# Supplementary material
Source: publisher figshare collection journal article supplement (https://gsajournals.figshare.com/articles/dataset/_/7414073)
Supplement: Supplementary file 1 [file 1]

## Sheet: Single bases and small indels
Table S2. Variants in the GWAS hit region.
Sheet 1: Single base and small indel variants where all cases have the same genotype and controls have different genotypes
As all cases have the same genotype, they are shown as a single line to simplify the table. Green shading shows the homozygous region; dark green shows the region where all cases and no controls are homozygous. Blue shading shows the extended region where 16/17 cases are homozygous. Orange and yellow shading show missense variants; grey shading shows a frameshift variant.
variant	pos	ref	alt2	gen	gonio	gene	SNP ID	effect
1	50646895	T	TGG	1/1	case	CYP26B1		intron_variant
1	50646895	T	TG,TGG	2/2	control	CYP26B1		intron_variant,intron_variant
1	50646895	T	TG,TGG	1/2	control	CYP26B1		intron_variant,intron_variant
1	50646895	T	TGG	0/1	control	CYP26B1		intron_variant
2	50689216	GT	G	0/1	case			intergenic_region
2	50689216	GT	G	1/1	case			intergenic_region
2	50689216	GT	G	1/1	control			intergenic_region
2	50689216	GT	G	1/1	control			intergenic_region
2	50689216	GT	G	1/1	control			intergenic_region
3	50829586	TCCC	T	1/1	case			intergenic_region
3	50829586	TCCCC	T,TC	1/2	control			intergenic_region,intergenic_region
3	50829586	TCCCC	T,TC	1/2	control			intergenic_region,intergenic_region
3	50829586	TCCC	T,TC	1/2	control			intergenic_region,intergenic_region
4	51058463	TA	T,T	1/1	case	DYSF		intron_variant,intron_variant
4	51058463	TA	T,T	0/1	control	DYSF		intron_variant,intron_variant
4	51058463	TAA	T,TA,T,TA	2/2	control	DYSF		intron_variant,intron_variant,intron_variant,intron_variant
4	51058463	TA	T,T	0/1	control	DYSF		intron_variant,intron_variant
5	51094998	TTTTA	T,T	1/1	case	DYSF		intron_variant,intron_variant
5	51094998	TTTTATTTATTTATTTA	T,TTTTATTTATTTA,T,TTTTATTTATTTA	1/2	control	DYSF		intron_variant,intron_variant,intron_variant,intron_variant
5	51094998	TTTTATTTA	T,TTTTA,T,TTTTA	1/2	control	DYSF		intron_variant,intron_variant,intron_variant,intron_variant
5	51094998	TTTTATTTATTTATTTA	T,TTTTATTTATTTA,T,TTTTATTTATTTA	1/2	control	DYSF		intron_variant,intron_variant,intron_variant,intron_variant
6	51314450	TA	T,T	1/1	case			downstream_gene_variant,intron_variant
6	51314450	TAA	T,TA,T,TA	2/2	control			downstream_gene_variant,downstream_gene_variant,intron_variant,intron_variant
6	51314450	TAA	T,TA,T,TA	2/2	control			downstream_gene_variant,downstream_gene_variant,intron_variant,intron_variant
6	51314450	TAA	T,TA,T,TA	0/2	control			downstream_gene_variant,downstream_gene_variant,intron_variant,intron_variant
7	51405368	C	CTATTTATT	1/1	case	PAIP2B		intron_variant
7	51405368	C	CTATTTATT,CTATTTATTTATT	1/2	control	PAIP2B		intron_variant,intron_variant
7	51405368	C	CTATTTATT	0/1	control	PAIP2B		intron_variant
7	51405368	C	CTATTTATT,CTATTTATTTATT	1/2	control	PAIP2B		intron_variant,intron_variant
8	51429527	AAGAGAGAGAG	A	1/1	case			intergenic_region
8	51429527	AAGAGAGAGAGAG	A,AAG	2/2	control			intergenic_region,intergenic_region
8	51429527	AAGAGAGAGAGAG	A,AAG	2/2	control			intergenic_region,intergenic_region
8	51429527	AAGAGAGAGAGAGAG	A,AAG,AAGAG	1/3	control			intergenic_region,intergenic_region,intergenic_region
9	51449595	C	CA	1/1	case			intergenic_region
9	51449595	C	CA	0/1	control			intergenic_region
9	51449595	C	CA	0/1	control			intergenic_region
9	51449595	C	CA	0/1	control			intergenic_region
11	51604115	TAA	T,T	1/1	case	RSBN1		intron_variant,intron_variant
11	51604115	TAA	T,T	0/1	control	RSBN1		intron_variant,intron_variant
11	51604115	TAA	T,T	0/1	control	RSBN1		intron_variant,intron_variant
11	51604115	TAA	T,T	0/1	control	RSBN1		intron_variant,intron_variant
12	51604118	A	C,C	1/1	case	RSBN1		intron_variant,intron_variant
12	51604118	A	C,C	0/1	control	RSBN1		intron_variant,intron_variant
12	51604118	A	C,C	0/1	control	RSBN1		intron_variant,intron_variant
12	51604118	A	C,C	0/1	control	RSBN1		intron_variant,intron_variant
13	51604119	TAAATAAATAA	T,T	1/1	case	RSBN1		intron_variant,intron_variant
13	51604119	TAAATAAATAA	T,T	0/1	control	RSBN1		intron_variant,intron_variant
13	51604119	TAAATAAATAA	T,T	0/1	control	RSBN1		intron_variant,intron_variant
13	51604119	TAAATAAATAA	T,T	0/1	control	RSBN1		intron_variant,intron_variant
14	51622675	C	A,A,A,A	1/1	case			upstream_gene_variant,upstream_gene_variant,downstream_gene_variant,intergenic_region
14	51622675	C	A,A,A,A	0/1	control			upstream_gene_variant,upstream_gene_variant,downstream_gene_variant,intergenic_region
14	51622675	C	A,A,A,A	0/1	control			upstream_gene_variant,upstream_gene_variant,downstream_gene_variant,intergenic_region
14	51622675	C	A,A,A,A	0/1	control			upstream_gene_variant,upstream_gene_variant,downstream_gene_variant,intergenic_region
15	51735429	G	C,C	1/1	case	HIPK1		intron_variant,intron_variant
15	51735429	G	C,C	0/1	control	HIPK1		intron_variant,intron_variant
15	51735429	G	C,C	0/1	control	HIPK1		intron_variant,intron_variant
15	51735429	G	C,C	0/1	control	HIPK1		intron_variant,intron_variant
16	51735967	T	C,C	1/1	case	HIPK1		intron_variant,intron_variant
16	51735967	T	C,C	0/1	control	HIPK1		intron_variant,intron_variant
16	51735967	T	C,C	0/1	control	HIPK1		intron_variant,intron_variant
16	51735967	T	C,C	0/1	control	HIPK1		intron_variant,intron_variant
17	51744521	C	T,T	1/1	case	HIPK1		intron_variant,intron_variant
17	51744521	C	T,T	0/1	control	HIPK1		intron_variant,intron_variant
17	51744521	C	T,T	0/1	control	HIPK1		intron_variant,intron_variant
17	51744521	C	T,T	0/1	control	HIPK1		intron_variant,intron_variant
18	51768097	ATTTAT	A,A	1/1	case	HIPK1		intron_variant,intron_variant
18	51768097	ATTTAT	A,A	0/1	control	HIPK1		intron_variant,intron_variant
18	51768097	ATTTAT	A,A	0/1	control	HIPK1		intron_variant,intron_variant
18	51768097	ATTTAT	A,A	0/1	control	HIPK1		intron_variant,intron_variant
19	51786109	C	T,T	1/1	case			downstream_gene_variant,intron_variant
19	51786109	C	T,T	0/1	control			downstream_gene_variant,intron_variant
19	51786109	C	T,T	0/1	control			downstream_gene_variant,intron_variant
19	51786109	C	T,T	0/1	control			downstream_gene_variant,intron_variant
20	51786924	G	A	1/1	case	OLFML3		missense_variant
20	51786924	G	A	0/1	control	OLFML3		missense_variant
20	51786924	G	A	0/1	control	OLFML3		missense_variant
20	51786924	G	A	0/1	control	OLFML3		missense_variant
21	51788453	A	T,T	1/1	case			downstream_gene_variant,intergenic_region
21	51788453	A	T,T	0/1	control			downstream_gene_variant,intergenic_region
21	51788453	A	T,T	0/1	control			downstream_gene_variant,intergenic_region
21	51788453	A	T,T	0/1	control			downstream_gene_variant,intergenic_region
22	51793545	A	C	1/1	case			intergenic_region
22	51793545	A	C	0/1	control			intergenic_region
22	51793545	A	C	0/1	control			intergenic_region
22	51793545	A	C	0/1	control			intergenic_region
23	51794581	C	T	1/1	case			intergenic_region
23	51794581	C	T	0/1	control			intergenic_region
23	51794581	C	T	0/1	control			intergenic_region
23	51794581	C	T	0/1	control			intergenic_region
24	51795269	C	T	1/1	case			intergenic_region
24	51795269	C	T	0/1	control			intergenic_region
24	51795269	C	T	0/1	control			intergenic_region
24	51795269	C	T	0/1	control			intergenic_region
25	51795378	C	T	1/1	case			intergenic_region
25	51795378	C	T	0/1	control			intergenic_region
25	51795378	C	T	0/1	control			intergenic_region
25	51795378	C	T	0/1	control			intergenic_region
26	51795384	A	G	1/1	case			intergenic_region
26	51795384	A	G	0/1	control			intergenic_region
26	51795384	A	G	0/1	control			intergenic_region
26	51795384	A	G	0/1	control			intergenic_region
27	51795588	T	C	1/1	case			intergenic_region
27	51795588	T	C	0/1	control			intergenic_region
27	51795588	T	C	0/1	control			intergenic_region
27	51795588	T	C	0/1	control			intergenic_region
28	51795606	T	C	1/1	case			intergenic_region
28	51795606	T	C	0/1	control			intergenic_region
28	51795606	T	C	0/1	control			intergenic_region
28	51795606	T	C	0/1	control			intergenic_region
29	51795726	G	C	1/1	case			intergenic_region
29	51795726	G	C	0/1	control			intergenic_region
29	51795726	G	C	0/1	control			intergenic_region
29	51795726	G	C	0/1	control			intergenic_region
30	51795731	A	G	1/1	case			intergenic_region
30	51795731	A	G	0/1	control			intergenic_region
30	51795731	A	G	0/1	control			intergenic_region
30	51795731	A	G	0/1	control			intergenic_region
31	51796880	A	AT	1/1	case			intergenic_region
31	51796880	A	AT	0/1	control			intergenic_region
31	51796880	A	AT	0/1	control			intergenic_region
31	51796880	A	AT	0/1	control			intergenic_region
32	51797749	A	G	1/1	case			intergenic_region
32	51797749	A	G	0/1	control			intergenic_region
32	51797749	A	G	0/1	control			intergenic_region
32	51797749	A	G	0/1	control			intergenic_region
33	51798045	T	C	1/1	case			intergenic_region
33	51798045	T	C	0/1	control			intergenic_region
33	51798045	T	C	0/1	control			intergenic_region
33	51798045	T	C	0/1	control			intergenic_region
34	51798750	C	T	1/1	case			intergenic_region
34	51798750	C	T	0/1	control			intergenic_region
34	51798750	C	T	0/1	control			intergenic_region
34	51798750	C	T	0/1	control			intergenic_region
35	51800030	A	AT	1/1	case			intergenic_region
35	51800030	A	AT	0/1	control			intergenic_region
35	51800030	A	AT	0/1	control			intergenic_region
35	51800030	A	AT,ATT	0/1	control			intergenic_region,intergenic_region
36	51800902	C	T	1/1	case			intergenic_region
36	51800902	C	T	0/1	control			intergenic_region
36	51800902	C	T	0/1	control			intergenic_region
36	51800902	C	T	0/1	control			intergenic_region
36	51800902	C	T	0/1	control			intergenic_region
37	51801152	G	GCGCCCCCCTCCCTGGTACC	1/1	case			intergenic_region
37	51801152	G	GCGCCCCCCTCCCTGGTACC	0/1	control			intergenic_region
37	51801152	G	GCGCCCCCCTCCCTGGTACC	0/1	control			intergenic_region
37	51801152	G	GCGCCCCCCTCCCTGGTACC	0/1	control			intergenic_region
38	51801285	C	T	1/1	case			intergenic_region
38	51801285	C	T	0/1	control			intergenic_region
38	51801285	C	T	0/1	control			intergenic_region
38	51801285	C	T	0/1	control			intergenic_region
39	51802207	T	C	1/1	case			intergenic_region
39	51802207	T	C	0/1	control			intergenic_region
39	51802207	T	C	0/1	control			intergenic_region
39	51802207	T	C	0/1	control			intergenic_region
40	51802342	T	C	1/1	case			intergenic_region
40	51802342	T	C	0/1	control			intergenic_region
40	51802342	T	C	0/1	control			intergenic_region
40	51802342	T	C	0/1	control			intergenic_region
41	51802373	T	A	1/1	case			intergenic_region
41	51802373	T	A	0/1	control			intergenic_region
41	51802373	T	A	0/1	control			intergenic_region
41	51802373	T	A	0/1	control			intergenic_region
42	51808772	T	C	1/1	case			intergenic_region
42	51808772	T	C	0/1	control			intergenic_region
42	51808772	T	C	0/1	control			intergenic_region
42	51808772	T	C	0/1	control			intergenic_region
43	51811122	G	T	1/1	case			intergenic_region
43	51811122	G	T	0/1	control			intergenic_region
43	51811122	G	T	0/1	control			intergenic_region
43	51811122	G	T	0/1	control			intergenic_region
44	51812462	A	G	1/1	case			intergenic_region
44	51812462	A	G	0/1	control			intergenic_region
44	51812462	A	G	0/1	control			intergenic_region
44	51812462	A	G	0/1	control			intergenic_region
45	51816281	AT	A	1/1	case			intergenic_region
45	51816281	AT	A	0/1	control			intergenic_region
45	51816281	AT	A	0/1	control			intergenic_region
45	51816281	AT	A	0/1	control			intergenic_region
46	51816606	C	T	1/1	case			intergenic_region
46	51816606	C	T	0/1	control			intergenic_region
46	51816606	C	T	0/1	control			intergenic_region
46	51816606	C	T	0/1	control			intergenic_region
47	51816655	A	G	1/1	case			intergenic_region
47	51816655	A	G	0/1	control			intergenic_region
47	51816655	A	G	0/1	control			intergenic_region
47	51816655	A	G	0/1	control			intergenic_region
48	51834155	T	C	1/1	case			intergenic_region
48	51834155	T	C	0/1	control			intergenic_region
48	51834155	T	C	0/1	control			intergenic_region
48	51834155	T	C	0/1	control			intergenic_region
49	51841446	C	T	1/1	case			intergenic_region
49	51841446	C	T	0/1	control			intergenic_region
49	51841446	C	T	0/1	control			intergenic_region
49	51841446	C	T	0/1	control			intergenic_region
50	51842269	C	G	1/1	case			intergenic_region
50	51842269	C	G	0/1	control			intergenic_region
50	51842269	C	G	0/1	control			intergenic_region
50	51842269	C	G	0/1	control			intergenic_region
50	51842269	C	G	0/1	control			intergenic_region
51	51842581	G	A	1/1	case			intergenic_region
51	51842581	G	A	0/1	control			intergenic_region
51	51842581	G	A	0/1	control			intergenic_region
51	51842581	G	A	0/1	control			intergenic_region
52	51842649	T	C	1/1	case			intergenic_region
52	51842649	T	C	0/1	control			intergenic_region
52	51842649	T	C	0/1	control			intergenic_region
52	51842649	T	C	0/1	control			intergenic_region
52	51842649	T	C	0/1	control			intergenic_region
53	51843099	C	A,CCA	1/1	case			intergenic_region,intergenic_region
53	51843099	C	A,CCA	0/1	control			intergenic_region,intergenic_region
53	51843099	C	A,CCA	0/1	control			intergenic_region,intergenic_region
53	51843099	C	A,CCA	0/1	control			intergenic_region,intergenic_region
53	51843099	C	A,CCA	0/1	control			intergenic_region,intergenic_region
54	51843327	A	G	1/1	case			intergenic_region
54	51843327	A	G	0/1	control			intergenic_region
54	51843327	A	G	0/1	control			intergenic_region
54	51843327	A	G	0/1	control			intergenic_region
54	51843327	A	G	0/1	control			intergenic_region
55	51843328	G	A	1/1	case			intergenic_region
55	51843328	G	A	0/1	control			intergenic_region
55	51843328	G	A	0/1	control			intergenic_region
55	51843328	G	A	0/1	control			intergenic_region
55	51843328	G	A	0/1	control			intergenic_region
56	51843349	T	TGAG	1/1	case			intergenic_region
56	51843349	T	TGAG	0/1	control			intergenic_region
56	51843349	T	TGAG	0/1	control			intergenic_region
56	51843349	T	TGAG	0/1	control			intergenic_region
56	51843349	T	TGAG	0/1	control			intergenic_region
57	51843569	C	T	1/1	case			intergenic_region
57	51843569	C	T	0/1	control			intergenic_region
57	51843569	C	T	0/1	control			intergenic_region
57	51843569	C	T	0/1	control			intergenic_region
58	51844025	A	G	1/1	case			intergenic_region
58	51844025	A	G	0/1	control			intergenic_region
58	51844025	A	G	0/1	control			intergenic_region
58	51844025	A	G	0/1	control			intergenic_region
59	51844190	G	T	1/1	case			intergenic_region
59	51844190	G	T,GTTTTTTTTTTTTT	1/2	control			intergenic_region,intergenic_region
59	51844190	G	T,GTTTTTTTTTTTTTT	1/2	control			intergenic_region,intergenic_region
59	51844190	G	T,GTTTTTTTTTTTTT	1/2	control			intergenic_region,intergenic_region
60	51847705	C	A	1/1	case			intergenic_region
60	51847705	C	A	0/1	control			intergenic_region
60	51847705	C	A	0/1	control			intergenic_region
60	51847705	C	A	0/1	control			intergenic_region
61	51848192	TA	T	1/1	case			intergenic_region
61	51848192	TA	T	0/1	control			intergenic_region
61	51848192	TA	T	0/1	control			intergenic_region
61	51848192	TA	T	0/1	control			intergenic_region
62	51852097	G	A	1/1	case			intergenic_region
62	51852097	G	A	0/1	control			intergenic_region
62	51852097	G	A	0/1	control			intergenic_region
62	51852097	G	A	0/1	control			intergenic_region
63	51854948	C	T	1/1	case			intergenic_region
63	51854948	C	T	0/1	control			intergenic_region
63	51854948	C	T	0/1	control			intergenic_region
63	51854948	C	T	0/1	control			intergenic_region
64	51859212	T	A	1/1	case			intergenic_region
64	51859212	T	A,G	1/2	control			intergenic_region,intergenic_region
64	51859212	T	A,G	1/2	control			intergenic_region,intergenic_region
64	51859212	T	A	0/1	control			intergenic_region
65	51866919	G	A,A	1/1	case	SYT6		downstream_gene_variant,intron_variant
65	51866919	G	A,A	0/1	control	SYT6		downstream_gene_variant,intron_variant
65	51866919	G	A,A	0/1	control	SYT6		downstream_gene_variant,intron_variant
65	51866919	G	A,A	0/1	control	SYT6		downstream_gene_variant,intron_variant
66	51868374	C	A,A	1/1	case	SYT6		downstream_gene_variant,intron_variant
66	51868374	C	A,A	0/1	control	SYT6		downstream_gene_variant,intron_variant
66	51868374	C	A,A	0/1	control	SYT6		downstream_gene_variant,intron_variant
66	51868374	C	A,A	0/1	control	SYT6		downstream_gene_variant,intron_variant
67	51868508	T	G,G	1/1	case	SYT6		downstream_gene_variant,intron_variant
67	51868508	T	G,G	0/1	control	SYT6		downstream_gene_variant,intron_variant
67	51868508	T	G,G	0/1	control	SYT6		downstream_gene_variant,intron_variant
67	51868508	T	G,G	0/1	control	SYT6		downstream_gene_variant,intron_variant
68	51868974	T	G,G	1/1	case	SYT6		downstream_gene_variant,intron_variant
68	51868974	T	G,G	0/1	control	SYT6		downstream_gene_variant,intron_variant
68	51868974	T	G,G	0/1	control	SYT6		downstream_gene_variant,intron_variant
68	51868974	T	G,G	0/1	control	SYT6		downstream_gene_variant,intron_variant
69	51869069	G	T,T	1/1	case	SYT6		downstream_gene_variant,intron_variant
69	51869069	G	T,T	0/1	control	SYT6		downstream_gene_variant,intron_variant
69	51869069	G	T,T	0/1	control	SYT6		downstream_gene_variant,intron_variant
69	51869069	G	T,T	0/1	control	SYT6		downstream_gene_variant,intron_variant
70	51871279	G	A,A	1/1	case	SYT6		intron_variant,intron_variant
70	51871279	G	A,A	0/1	control	SYT6		intron_variant,intron_variant
70	51871279	G	A,A	0/1	control	SYT6		intron_variant,intron_variant
70	51871279	G	A,A	0/1	control	SYT6		intron_variant,intron_variant
71	51874711	C	G,G	1/1	case	SYT6		intron_variant,intron_variant
71	51874711	C	G,G	0/1	control	SYT6		intron_variant,intron_variant
71	51874711	C	G,G	0/1	control	SYT6		intron_variant,intron_variant
71	51874711	C	G,G	0/1	control	SYT6		intron_variant,intron_variant
72	51910678	C	T,T	1/1	case	SYT6		synonymous_variant,synonymous_variant
72	51910678	C	T,T	0/1	control	SYT6		synonymous_variant,synonymous_variant
72	51910678	C	T,T	0/1	control	SYT6		synonymous_variant,synonymous_variant
72	51910678	C	T,T	0/1	control	SYT6		synonymous_variant,synonymous_variant
73	51911925	T	C,C	1/1	case	SYT6		intron_variant,intron_variant
73	51911925	T	C,C	0/1	control	SYT6		intron_variant,intron_variant
73	51911925	T	C,C	0/1	control	SYT6		intron_variant,intron_variant
73	51911925	T	C,C	0/1	control	SYT6		intron_variant,intron_variant
74	51914864	C	T,T	1/1	case	SYT6		intron_variant,intron_variant
74	51914864	C	T,T	0/1	control	SYT6		intron_variant,intron_variant
74	51914864	C	T,T	0/1	control	SYT6		intron_variant,intron_variant
74	51914864	C	T,T	0/1	control	SYT6		intron_variant,intron_variant
75	51916160	G	A,A	1/1	case	SYT6		intron_variant,intron_variant
75	51916160	G	A,A	0/1	control	SYT6		intron_variant,intron_variant
75	51916160	G	A,A	0/1	control	SYT6		intron_variant,intron_variant
75	51916160	G	A,A	0/1	control	SYT6		intron_variant,intron_variant
76	51932026	C	CCACA,CCACACA	2/2	case			intergenic_region,intergenic_region
76	51932026	C	CCACACA	1/1	case			intergenic_region
76	51932026	C	CCACA,CCACACA	1/2	control			intergenic_region,intergenic_region
76	51932026	C	CCACACA	1/1	control			intergenic_region
76	51932026	C	CCACACA	1/1	control			intergenic_region
77	51943427	G	C	1/1	case			intergenic_region
77	51943427	G	C	0/1	case			intergenic_region
77	51943427	G	C	0/1	control			intergenic_region
77	51943427	G	C	0/1	control			intergenic_region
77	51943427	G	C	0/1	control			intergenic_region
78	51958212	C	T	1/1	case			intergenic_region
78	51958212	C	T	0/1	control			intergenic_region
78	51958212	C	T	0/1	control			intergenic_region
78	51958212	C	T	0/1	control			intergenic_region
79	51993349	CAA	C	0/1	case			intergenic_region
79	51993349	CAA	C	1/1	case			intergenic_region
79	51993349	CAA	C	1/1	control			intergenic_region
79	51993349	CAA	AAA,C	1/2	control			intergenic_region,intergenic_region
79	51993349	CAA	C	1/1	control			intergenic_region
80	52012364	C	A	1/1	case			intergenic_region
80	52012364	C	A	0/1	control			intergenic_region
80	52012364	C	A	0/1	control			intergenic_region
80	52012364	C	A	0/1	control			intergenic_region
81	52012405	G	A	1/1	case			intergenic_region
81	52012405	G	A	0/1	control			intergenic_region
81	52012405	G	A	0/1	control			intergenic_region
81	52012405	G	A	0/1	control			intergenic_region
82	52012749	T	A	1/1	case			intergenic_region
82	52012749	T	A	0/1	control			intergenic_region
82	52012749	T	A	0/1	control			intergenic_region
82	52012749	T	A	0/1	control			intergenic_region
83	52012985	G	A	1/1	case			intergenic_region
83	52012985	G	A	0/1	control			intergenic_region
83	52012985	G	A	0/1	control			intergenic_region
83	52012985	G	A	0/1	control			intergenic_region
84	52020293	G	C	1/1	case			intergenic_region
84	52020293	G	C	0/1	control			intergenic_region
84	52020293	G	C	0/1	control			intergenic_region
84	52020293	G	C	0/1	control			intergenic_region
85	52035294	G	A	1/1	case			intergenic_region
85	52035294	G	A	0/1	control			intergenic_region
85	52035294	G	A	0/1	control			intergenic_region
85	52035294	G	A	0/1	control			intergenic_region
86	52035837	G	A	1/1	case			intergenic_region
86	52035837	G	A	0/1	control			intergenic_region
86	52035837	G	A	0/1	control			intergenic_region
86	52035837	G	A	0/1	control			intergenic_region
87	52035892	C	T	1/1	case			intergenic_region
87	52035892	C	T	0/1	control			intergenic_region
87	52035892	C	T	0/1	control			intergenic_region
87	52035892	C	T	0/1	control			intergenic_region
88	52036077	T	TC	1/1	case			intergenic_region
88	52036077	T	TC	0/1	control			intergenic_region
88	52036077	T	TC	0/1	control			intergenic_region
88	52036077	T	TC	0/1	control			intergenic_region
89	52041392	A	AAGAAGGAGAAGGAGAAGG	1/1	case			intergenic_region
89	52041392	AAGAAGG	A,AAGAAGGAGAAGGAGAAGGAGAAGG	1/2	control			intergenic_region,intergenic_region
89	52041392	AAGAAGG	A,AAGAAGGAGAAGGAGAAGGAGAAGG	1/2	control			intergenic_region,intergenic_region
89	52041392	AAGAAGG	A,AAGAAGGAGAAGGAGAAGGAGAAGG	1/2	control			intergenic_region,intergenic_region
90	52041748	G	A	1/1	case			intergenic_region
90	52041748	G	A	0/1	control			intergenic_region
90	52041748	G	A	0/1	control			intergenic_region
90	52041748	G	A	0/1	control			intergenic_region
91	52053161	G	A,A	1/1	case			downstream_gene_variant,intergenic_region
91	52053161	G	A,A	0/1	control			downstream_gene_variant,intergenic_region
91	52053161	G	A,A	0/1	control			downstream_gene_variant,intergenic_region
91	52053161	G	A,A	0/1	control			downstream_gene_variant,intergenic_region
92	52070902	T	G	1/1	case			intergenic_region
92	52070902	T	G	0/1	control			intergenic_region
92	52070902	T	G	0/1	control			intergenic_region
92	52070902	T	G	0/1	control			intergenic_region
93	52074066	G	T	1/1	case			intergenic_region
93	52074066	G	T	0/1	control			intergenic_region
93	52074066	G	T	0/1	control			intergenic_region
93	52074066	G	T	0/1	control			intergenic_region
94	52091049	G	A	1/1	case			intergenic_region
94	52091049	G	A	0/1	control			intergenic_region
94	52091049	G	A	0/1	control			intergenic_region
94	52091049	G	A	0/1	control			intergenic_region
95	52123477	G	GAGAGA,GAAGAGAAGAGAGAGAAGAGAGAGA	2/2	case	TRIM33		intron_variant,intron_variant
95	52123477	G	GAGAGA,GAAGAGAAGAGAGAGAAGAGAGAGA	0/2	control	TRIM33		intron_variant,intron_variant
95	52123477	G	GAGAGA,GAGAGAAGAGAGAGA	0/3	control	TRIM33		intron_variant,intron_variant
95	52123477	G	GAGAGA,GAAGAGAGAGAAGAGAGAGA	0/2	control	TRIM33		intron_variant,intron_variant
96	52218175	A	AGGAAGAG	1/1	case	TRIM33		intron_variant
96	52218175	A	AGGAAGAG,AGAGAAGAGAAGGAAGAG	0/2	control	TRIM33		intron_variant,intron_variant
96	52218175	A	AGGAAGAG,AGAGAAGAGAAGGAAGAG	0/1	control	TRIM33		intron_variant,intron_variant
96	52218175	A	AGGAAGAG	0/1	control	TRIM33		intron_variant
97	52241235	TATAA	T	1/1	case			intergenic_region
97	52241235	TATAA	T,TAAAATAA	1/2	control			intergenic_region,intergenic_region
97	52241235	TATAA	T,TAAAATAA	1/2	control			intergenic_region,intergenic_region
97	52241235	TATAA	T	0/1	control			intergenic_region
98	52246698	C	T	1/1	case			intergenic_region
98	52246698	C	T	0/1	control			intergenic_region
98	52246698	C	T	0/1	control			intergenic_region
98	52246698	C	T	0/1	control			intergenic_region
99	52292860	T	C,C,C,C	1/1	case			upstream_gene_variant,downstream_gene_variant,downstream_gene_variant,intergenic_region
99	52292860	T	C,C,C,C	0/1	control			upstream_gene_variant,downstream_gene_variant,downstream_gene_variant,intergenic_region
99	52292860	T	C,C,C,C	0/1	control			upstream_gene_variant,downstream_gene_variant,downstream_gene_variant,intergenic_region
99	52292860	T	C,C,C,C	0/1	control			upstream_gene_variant,downstream_gene_variant,downstream_gene_variant,intergenic_region
100	52293293	T	TAGCTC,TAGCTC,TAGCTC,TAGCTC	1/1	case			upstream_gene_variant,downstream_gene_variant,downstream_gene_variant,intergenic_region
100	52293293	T	TAGCTC,TAGCTC,TAGCTC,TAGCTC	0/1	control			upstream_gene_variant,downstream_gene_variant,downstream_gene_variant,intergenic_region
100	52293293	T	TAGCTC,TAGCTC,TAGCTC,TAGCTC	0/1	control			upstream_gene_variant,downstream_gene_variant,downstream_gene_variant,intergenic_region
100	52293293	T	TAGCTC,TAGCTC,TAGCTC,TAGCTC	0/1	control			upstream_gene_variant,downstream_gene_variant,downstream_gene_variant,intergenic_region
101	52300285	C	T,T	1/1	case	DENN2C		intron_variant,intron_variant
101	52300285	C	T,T	0/1	control	DENN2C		intron_variant,intron_variant
101	52300285	C	T,T	0/1	control	DENN2C		intron_variant,intron_variant
101	52300285	C	T,T	0/1	control	DENN2C		intron_variant,intron_variant
102	52303226	T	C,C	1/1	case	DENN2C		intron_variant,intron_variant
102	52303226	T	C,C	0/1	control	DENN2C		intron_variant,intron_variant
102	52303226	T	C,C	0/1	control	DENN2C		intron_variant,intron_variant
102	52303226	T	C,C	0/1	control	DENN2C		intron_variant,intron_variant
103	52303338	A	G,G	1/1	case	DENN2C		intron_variant,intron_variant
103	52303338	A	G,G	0/1	control	DENN2C		intron_variant,intron_variant
103	52303338	A	G,G	0/1	control	DENN2C		intron_variant,intron_variant
103	52303338	A	G,G	0/1	control	DENN2C		intron_variant,intron_variant
104	52304879	A	AAGAAAG,AAGAAAG	1/1	case	DENN2C		intron_variant,intron_variant
104	52304879	A	AAGAAAG,AAGAAAG	0/1	control	DENN2C		intron_variant,intron_variant
104	52304879	A	AAGAAAG,AAGAAAG	0/1	control	DENN2C		intron_variant,intron_variant
104	52304879	A	AAGAAAG,AAGAAAG	0/1	control	DENN2C		intron_variant,intron_variant
105	52306035	C	T,T	1/1	case	DENN2C		intron_variant,intron_variant
105	52306035	C	T,T	0/1	control	DENN2C		intron_variant,intron_variant
105	52306035	C	T,T	0/1	control	DENN2C		intron_variant,intron_variant
105	52306035	C	T,T	0/1	control	DENN2C		intron_variant,intron_variant
106	52308483	TA	T,T	1/1	case	DENN2C		intron_variant,intron_variant
106	52308483	TA	T,T	0/1	control	DENN2C		intron_variant,intron_variant
106	52308483	TA	T,T	0/1	control	DENN2C		intron_variant,intron_variant
106	52308483	TA	T,T	0/1	control	DENN2C		intron_variant,intron_variant
107	52319341	G	A,A	1/1	case	DENN2C		intron_variant,intron_variant
107	52319341	G	A,A	0/1	control	DENN2C		intron_variant,intron_variant
107	52319341	G	A,A	0/1	control	DENN2C		intron_variant,intron_variant
107	52319341	G	A,A	0/1	control	DENN2C		intron_variant,intron_variant
108	52339162	C	T	1/1	case			intergenic_region
108	52339162	C	T	0/1	control			intergenic_region
108	52339162	C	T	0/1	control			intergenic_region
108	52339162	C	T	0/1	control			intergenic_region
109	52345884	CCT	C	1/1	case			intergenic_region
109	52345884	CCT	CTCT,C	1/2	control			intergenic_region,intergenic_region
109	52345884	CCT	CTCT,C	1/2	control			intergenic_region,intergenic_region
109	52345884	CCT	CTCT,C	1/2	control			intergenic_region,intergenic_region
110	52345900	CTG	C	1/1	case			intergenic_region
110	52345900	CTG	C	0/1	control			intergenic_region
110	52345900	CTG	C	0/1	control			intergenic_region
110	52345900	CTG	C	0/1	control			intergenic_region
111	52354818	TA	T	1/1	case			intergenic_region
111	52354818	TA	T	0/1	control			intergenic_region
111	52354818	TA	T	0/1	control			intergenic_region
111	52354818	TA	T	0/1	control			intergenic_region
112	52363576	G	A	1/1	case	CDK2AP1		missense_variant
112	52363576	G	A	0/1	control	CDK2AP1		missense_variant
112	52363576	G	A	0/1	control	CDK2AP1		missense_variant
112	52363576	G	A	0/1	control	CDK2AP1		missense_variant
113	52432084	C	CT	1/1	case	CSDE1		intron_variant
113	52432084	C	CT	0/1	control	CSDE1		intron_variant
113	52432084	C	CT	0/1	control	CSDE1		intron_variant
113	52432084	C	CT,CTT	0/1	control	CSDE1		intron_variant,intron_variant
114	52477803	C	CTTAA,CTTAA	1/1	case			upstream_gene_variant,intergenic_region
114	52477803	C	CTTAA,CTTAA	0/1	control			upstream_gene_variant,intergenic_region
114	52477803	C	CTTAA,CTTAA	0/1	control			upstream_gene_variant,intergenic_region
114	52477803	C	CTTAA,CTTAA	0/1	control			upstream_gene_variant,intergenic_region
115	52477849	A	T,T	1/1	case			upstream_gene_variant,intergenic_region
115	52477849	A	T,T	0/1	control			upstream_gene_variant,intergenic_region
115	52477849	A	T,T	0/1	control			upstream_gene_variant,intergenic_region
115	52477849	A	T,T	0/1	control			upstream_gene_variant,intergenic_region
116	52478671	T	C,C	1/1	case			upstream_gene_variant,intergenic_region
116	52478671	T	C,C	0/1	control			upstream_gene_variant,intergenic_region
116	52478671	T	C,C	0/1	control			upstream_gene_variant,intergenic_region
116	52478671	T	C,C	0/1	control			upstream_gene_variant,intergenic_region
117	52479914	T	C,C	1/1	case			upstream_gene_variant,intergenic_region
117	52479914	T	C,C	0/1	control			upstream_gene_variant,intergenic_region
117	52479914	T	C,C	0/1	control			upstream_gene_variant,intergenic_region
117	52479914	T	C,C	0/1	control			upstream_gene_variant,intergenic_region
118	52480657	T	C,C	1/1	case			upstream_gene_variant,intergenic_region
118	52480657	T	C,C	0/1	control			upstream_gene_variant,intergenic_region
118	52480657	T	C,C	0/1	control			upstream_gene_variant,intergenic_region
118	52480657	T	C,C	0/1	control			upstream_gene_variant,intergenic_region
119	52481455	A	C	1/1	case			intergenic_region
119	52481455	A	C	0/1	control			intergenic_region
119	52481455	A	C	0/1	control			intergenic_region
119	52481455	A	C	0/1	control			intergenic_region
120	52481485	T	A	1/1	case			intergenic_region
120	52481485	T	A	0/1	control			intergenic_region
120	52481485	T	A	0/1	control			intergenic_region
120	52481485	T	A	0/1	control			intergenic_region
121	52481549	G	GA	1/1	case			intergenic_region
121	52481549	G	GA	0/1	control			intergenic_region
121	52481549	G	GA	0/1	control			intergenic_region
121	52481549	G	GA	0/1	control			intergenic_region
122	52482391	A	T	1/1	case			intergenic_region
122	52482391	A	T	0/1	control			intergenic_region
122	52482391	A	T	0/1	control			intergenic_region
122	52482391	A	T	0/1	control			intergenic_region
123	52482465	GC	G	1/1	case			intergenic_region
123	52482465	GC	G	0/1	control			intergenic_region
123	52482465	GC	G	0/1	control			intergenic_region
123	52482465	GC	G	0/1	control			intergenic_region
124	52482749	A	G	1/1	case			intergenic_region
124	52482749	A	G	0/1	control			intergenic_region
124	52482749	A	G	0/1	control			intergenic_region
124	52482749	A	G	0/1	control			intergenic_region
125	52482764	A	G	1/1	case			intergenic_region
125	52482764	A	G	0/1	control			intergenic_region
125	52482764	A	G	0/1	control			intergenic_region
125	52482764	A	G	0/1	control			intergenic_region
126	52482867	A	G	1/1	case			intergenic_region
126	52482867	A	G	0/1	control			intergenic_region
126	52482867	A	G	0/1	control			intergenic_region
126	52482867	A	G	0/1	control			intergenic_region
127	52483285	T	TA	1/1	case			intergenic_region
127	52483285	T	TA	0/1	control			intergenic_region
127	52483285	T	TA	0/1	control			intergenic_region
127	52483285	T	TA	0/1	control			intergenic_region
128	52483867	A	G	1/1	case			intergenic_region
128	52483867	A	G	0/1	control			intergenic_region
128	52483867	A	G	0/1	control			intergenic_region
128	52483867	A	G	0/1	control			intergenic_region
129	52486341	G	A	1/1	case			intergenic_region
129	52486341	G	A	0/1	control			intergenic_region
129	52486341	G	A	0/1	control			intergenic_region
129	52486341	G	A	0/1	control			intergenic_region
130	52487228	T	G	1/1	case			intergenic_region
130	52487228	T	G	0/1	control			intergenic_region
130	52487228	T	G	0/1	control			intergenic_region
130	52487228	T	G	0/1	control			intergenic_region
131	52487232	C	T	1/1	case			intergenic_region
131	52487232	C	T	0/1	control			intergenic_region
131	52487232	C	T	0/1	control			intergenic_region
131	52487232	C	T	0/1	control			intergenic_region
132	52489392	T	C	1/1	case			intergenic_region
132	52489392	T	C	0/1	control			intergenic_region
132	52489392	T	C	0/1	control			intergenic_region
132	52489392	T	C	0/1	control			intergenic_region
133	52491688	A	G	1/1	case			intergenic_region
133	52491688	A	G	0/1	control			intergenic_region
133	52491688	A	G	0/1	control			intergenic_region
133	52491688	A	G	0/1	control			intergenic_region
134	52491837	T	G	1/1	case			intergenic_region
134	52491837	T	G	0/1	control			intergenic_region
134	52491837	T	G	0/1	control			intergenic_region
134	52491837	T	G	0/1	control			intergenic_region
135	52492084	C	G	1/1	case			intergenic_region
135	52492084	C	G	0/1	control			intergenic_region
135	52492084	C	G	0/1	control			intergenic_region
135	52492084	C	G	0/1	control			intergenic_region
136	52499846	G	A	1/1	case			intergenic_region
136	52499846	G	A	0/1	control			intergenic_region
136	52499846	G	A	0/1	control			intergenic_region
136	52499846	G	A	0/1	control			intergenic_region
137	52501984	G	GGT	1/1	case			intergenic_region
137	52501984	G	GGT	0/1	control			intergenic_region
137	52501984	G	GGT	0/1	control			intergenic_region
137	52501984	G	GGT	0/1	control			intergenic_region
138	52503338	G	T	1/1	case			intergenic_region
138	52503338	G	T	0/1	control			intergenic_region
138	52503338	G	T	0/1	control			intergenic_region
138	52503338	G	T	0/1	control			intergenic_region
139	52506611	C	T	1/1	case			intergenic_region
139	52506611	C	T	0/1	control			intergenic_region
139	52506611	C	T	0/1	control			intergenic_region
139	52506611	C	T	0/1	control			intergenic_region
140	52507761	A	G	1/1	case			intergenic_region
140	52507761	A	G	0/1	control			intergenic_region
140	52507761	A	G	0/1	control			intergenic_region
140	52507761	A	G	0/1	control			intergenic_region
141	52507769	A	G	1/1	case			intergenic_region
141	52507769	A	G	0/1	control			intergenic_region
141	52507769	A	G	0/1	control			intergenic_region
141	52507769	A	G	0/1	control			intergenic_region
142	52510158	G	T	1/1	case			intergenic_region
142	52510158	G	T	0/1	control			intergenic_region
142	52510158	G	T	0/1	control			intergenic_region
142	52510158	G	T	0/1	control			intergenic_region
143	52510171	G	A	1/1	case			intergenic_region
143	52510171	G	A	0/1	control			intergenic_region
143	52510171	G	A	0/1	control			intergenic_region
143	52510171	G	A	0/1	control			intergenic_region
144	52510280	G	A	1/1	case			intergenic_region
144	52510280	G	A	0/1	control			intergenic_region
144	52510280	G	A	0/1	control			intergenic_region
144	52510280	G	A	0/1	control			intergenic_region
145	52513972	A	G	1/1	case			intergenic_region
145	52513972	A	G	0/1	control			intergenic_region
145	52513972	A	G	0/1	control			intergenic_region
145	52513972	A	G	0/1	control			intergenic_region
146	52515589	C	T	1/1	case			intergenic_region
146	52515589	C	T	0/1	control			intergenic_region
146	52515589	C	T	0/1	control			intergenic_region
146	52515589	C	T	0/1	control			intergenic_region
147	52516777	G	A	1/1	case			intergenic_region
147	52516777	G	A	0/1	control			intergenic_region
147	52516777	G	A	0/1	control			intergenic_region
147	52516777	G	A	0/1	control			intergenic_region
148	52518661	A	T	1/1	case			intergenic_region
148	52518661	A	T	0/1	control			intergenic_region
148	52518661	A	T	0/1	control			intergenic_region
148	52518661	A	T	0/1	control			intergenic_region
149	52520038	T	A	1/1	case			intergenic_region
149	52520038	T	A	0/1	control			intergenic_region
149	52520038	T	A	0/1	control			intergenic_region
149	52520038	T	A	0/1	control			intergenic_region
150	52520351	C	T	1/1	case			intergenic_region
150	52520351	C	T	0/1	control			intergenic_region
150	52520351	C	T	0/1	control			intergenic_region
150	52520351	C	T	0/1	control			intergenic_region
151	52520965	G	A	1/1	case			intergenic_region
151	52520965	G	A	0/1	control			intergenic_region
151	52520965	G	A	0/1	control			intergenic_region
151	52520965	G	A	0/1	control			intergenic_region
152	52520972	A	G	1/1	case			intergenic_region
152	52520972	A	G	0/1	control			intergenic_region
152	52520972	A	G	0/1	control			intergenic_region
152	52520972	A	G	0/1	control			intergenic_region
153	52520988	A	G	1/1	case			intergenic_region
153	52520988	A	G	0/1	control			intergenic_region
153	52520988	A	G	0/1	control			intergenic_region
153	52520988	A	G	0/1	control			intergenic_region
154	52521006	A	G	1/1	case			intergenic_region
154	52521006	A	G	0/1	control			intergenic_region
154	52521006	A	G	0/1	control			intergenic_region
154	52521006	A	G	0/1	control			intergenic_region
155	52521025	G	C	1/1	case			intergenic_region
155	52521025	G	C	0/1	control			intergenic_region
155	52521025	G	C	0/1	control			intergenic_region
155	52521025	G	C	0/1	control			intergenic_region
156	52521027	T	G	1/1	case			intergenic_region
156	52521027	T	G	0/1	control			intergenic_region
156	52521027	T	G	0/1	control			intergenic_region
156	52521027	T	G	0/1	control			intergenic_region
157	52521060	C	G	1/1	case			intergenic_region
157	52521060	C	G	0/1	control			intergenic_region
157	52521060	C	G	0/1	control			intergenic_region
157	52521060	C	G	0/1	control			intergenic_region
158	52522437	A	G,G	1/1	case			upstream_gene_variant,intergenic_region
158	52522437	A	G,G	0/1	control			upstream_gene_variant,intergenic_region
158	52522437	A	G,G	0/1	control			upstream_gene_variant,intergenic_region
158	52522437	A	G,G	0/1	control			upstream_gene_variant,intergenic_region
159	52522935	A	G,G	1/1	case			upstream_gene_variant,intergenic_region
159	52522935	A	G,G	0/1	control			upstream_gene_variant,intergenic_region
159	52522935	A	G,G	0/1	control			upstream_gene_variant,intergenic_region
159	52522935	A	G,G	0/1	control			upstream_gene_variant,intergenic_region
160	52523304	T	TA,TAA,TA,TAA	1/1	case			upstream_gene_variant,upstream_gene_variant,intergenic_region,intergenic_region
160	52523304	T	TA,TA	1/1	case			upstream_gene_variant,intergenic_region
160	52523304	TA	T,TAA,T,TAA	0/2	control			upstream_gene_variant,upstream_gene_variant,intergenic_region,intergenic_region
160	52523304	T	TA,TAA,TA,TAA	0/1	control			upstream_gene_variant,upstream_gene_variant,intergenic_region,intergenic_region
160	52523304	T	TA,TAA,TA,TAA	0/1	control			upstream_gene_variant,upstream_gene_variant,intergenic_region,intergenic_region
161	52523687	C	T,T	1/1	case			upstream_gene_variant,intergenic_region
161	52523687	C	T,T	0/1	control			upstream_gene_variant,intergenic_region
161	52523687	C	T,T	0/1	control			upstream_gene_variant,intergenic_region
161	52523687	C	T,T	0/1	control			upstream_gene_variant,intergenic_region
162	52524785	G	C,C	1/1	case			upstream_gene_variant,intergenic_region
162	52524785	G	C,C	0/1	control			upstream_gene_variant,intergenic_region
162	52524785	G	C,C	0/1	control			upstream_gene_variant,intergenic_region
162	52524785	G	C,C	0/1	control			upstream_gene_variant,intergenic_region
163	52525009	G	A,A	1/1	case			upstream_gene_variant,intergenic_region
163	52525009	G	A,A	0/1	control			upstream_gene_variant,intergenic_region
163	52525009	G	A,A	0/1	control			upstream_gene_variant,intergenic_region
163	52525009	G	A,A	0/1	control			upstream_gene_variant,intergenic_region
164	52525352	G	A,A	1/1	case			upstream_gene_variant,intergenic_region
164	52525352	G	A,A	0/1	control			upstream_gene_variant,intergenic_region
164	52525352	G	A,A	0/1	control			upstream_gene_variant,intergenic_region
164	52525352	G	A,A	0/1	control			upstream_gene_variant,intergenic_region
165	52527295	A	T	1/1	case	ENSCAFG00000009671		intron_variant
165	52527295	A	T	0/1	control	ENSCAFG00000009671		intron_variant
165	52527295	A	T	0/1	control	ENSCAFG00000009671		intron_variant
165	52527295	A	T	0/1	control	ENSCAFG00000009671		intron_variant
166	52531358	A	C	1/1	case	ENSCAFG00000009671		intron_variant
166	52531358	A	C	0/1	control	ENSCAFG00000009671		intron_variant
166	52531358	A	C	0/1	control	ENSCAFG00000009671		intron_variant
166	52531358	A	C	0/1	control	ENSCAFG00000009671		intron_variant
167	52532990	GA	G	0/0	case	ENSCAFG00000009671		frameshift_variant
167	52532990	GA	G	0/1	control	ENSCAFG00000009671		frameshift_variant
167	52532990	GA	G	0/1	control	ENSCAFG00000009671		frameshift_variant
167	52532990	GA	G	0/1	control	ENSCAFG00000009671		frameshift_variant
168	52534199	C	T	1/1	case	ENSCAFG00000009671		intron_variant
168	52534199	C	T	0/1	control	ENSCAFG00000009671		intron_variant
168	52534199	C	T	0/1	control	ENSCAFG00000009671		intron_variant
168	52534199	C	T	0/1	control	ENSCAFG00000009671		intron_variant
169	52534412	G	GT	1/1	case	ENSCAFG00000009671		intron_variant
169	52534412	G	GT	0/1	control	ENSCAFG00000009671		intron_variant
169	52534412	G	GT	0/1	control	ENSCAFG00000009671		intron_variant
169	52534412	G	GT	0/1	control	ENSCAFG00000009671		intron_variant
170	52537293	TTTTA	T,T,T,T,T	1/1	case			upstream_gene_variant,upstream_gene_variant,upstream_gene_variant,downstream_gene_variant,intergenic_region
170	52537293	TTTTA	T,TTTTATTTA,T,TTTTATTTA,T,TTTTATTTA,T,TTTTATTTA,T,TTTTATTTA	1/2	control			upstream_gene_variant,upstream_gene_variant,upstream_gene_variant,upstream_gene_variant,upstream_gene_variant,upstream_gene_variant,downstream_gene_variant,downstream_gene_variant,intergenic_region,intergenic_region
170	52537293	TTTTA	T,TTTTATTTA,T,TTTTATTTA,T,TTTTATTTA,T,TTTTATTTA,T,TTTTATTTA	1/2	control			upstream_gene_variant,upstream_gene_variant,upstream_gene_variant,upstream_gene_variant,upstream_gene_variant,upstream_gene_variant,downstream_gene_variant,downstream_gene_variant,intergenic_region,intergenic_region
170	52537293	TTTTA	T,TTTTATTTA,T,TTTTATTTA,T,TTTTATTTA,T,TTTTATTTA,T,TTTTATTTA	1/2	control			upstream_gene_variant,upstream_gene_variant,upstream_gene_variant,upstream_gene_variant,upstream_gene_variant,upstream_gene_variant,downstream_gene_variant,downstream_gene_variant,intergenic_region,intergenic_region
171	52538623	T	C,C,C,C,C	1/1	case			upstream_gene_variant,upstream_gene_variant,upstream_gene_variant,downstream_gene_variant,intergenic_region
171	52538623	T	C,C,C,C,C	0/1	control			upstream_gene_variant,upstream_gene_variant,upstream_gene_variant,downstream_gene_variant,intergenic_region
171	52538623	T	C,C,C,C,C	0/1	control			upstream_gene_variant,upstream_gene_variant,upstream_gene_variant,downstream_gene_variant,intergenic_region
171	52538623	T	C,C,C,C,C	0/1	control			upstream_gene_variant,upstream_gene_variant,upstream_gene_variant,downstream_gene_variant,intergenic_region
172	52539817	T	TC,TC,TC,TC	1/1	case	SYCP1		downstream_gene_variant,intron_variant,intron_variant,intron_variant
172	52539817	T	TC,TC,TC,TC	0/1	control	SYCP1		downstream_gene_variant,intron_variant,intron_variant,intron_variant
172	52539817	T	TC,TC,TC,TC	0/1	control	SYCP1		downstream_gene_variant,intron_variant,intron_variant,intron_variant
172	52539817	T	TC,TC,TC,TC	0/1	control	SYCP1		downstream_gene_variant,intron_variant,intron_variant,intron_variant
173	52539851	G	T,T,T,T	1/1	case	SYCP1		downstream_gene_variant,intron_variant,intron_variant,intron_variant
173	52539851	G	T,T,T,T	0/1	control	SYCP1		downstream_gene_variant,intron_variant,intron_variant,intron_variant
173	52539851	G	T,T,T,T	0/1	control	SYCP1		downstream_gene_variant,intron_variant,intron_variant,intron_variant
173	52539851	G	T,T,T,T	0/1	control	SYCP1		downstream_gene_variant,intron_variant,intron_variant,intron_variant
174	52540127	A	G,G,G,G	1/1	case	SYCP1		downstream_gene_variant,intron_variant,intron_variant,intron_variant
174	52540127	A	G,G,G,G	0/1	control	SYCP1		downstream_gene_variant,intron_variant,intron_variant,intron_variant
174	52540127	A	G,G,G,G	0/1	control	SYCP1		downstream_gene_variant,intron_variant,intron_variant,intron_variant
174	52540127	A	G,G,G,G	0/1	control	SYCP1		downstream_gene_variant,intron_variant,intron_variant,intron_variant
175	52541454	T	C,C,C	1/1	case	SYCP1		intron_variant,intron_variant,intron_variant
175	52541454	T	C,C,C	0/1	control	SYCP1		intron_variant,intron_variant,intron_variant
175	52541454	T	C,C,C	0/1	control	SYCP1		intron_variant,intron_variant,intron_variant
175	52541454	T	C,C,C	0/1	control	SYCP1		intron_variant,intron_variant,intron_variant
176	52541971	C	T,T,T	1/1	case	SYCP1		intron_variant,intron_variant,intron_variant
176	52541971	C	T,T,T	0/1	control	SYCP1		intron_variant,intron_variant,intron_variant
176	52541971	C	T,T,T	0/1	control	SYCP1		intron_variant,intron_variant,intron_variant
176	52541971	C	T,T,T	0/1	control	SYCP1		intron_variant,intron_variant,intron_variant
177	52542634	T	TTTTA,TTTTA,TTTTA	1/1	case	SYCP1		intron_variant,intron_variant,intron_variant
177	52542634	TTTTATTTA	T,TTTTATTTATTTA,T,TTTTATTTATTTA,T,TTTTATTTATTTA	1/2	control	SYCP1		intron_variant,intron_variant,intron_variant,intron_variant,intron_variant,intron_variant
177	52542634	TTTTATTTA	T,TTTTATTTATTTA,T,TTTTATTTATTTA,T,TTTTATTTATTTA	1/2	control	SYCP1		intron_variant,intron_variant,intron_variant,intron_variant,intron_variant,intron_variant
177	52542634	T	TTTTA,TTTTA,TTTTA	0/1	control	SYCP1		intron_variant,intron_variant,intron_variant
178	52547817	C	T,T,T	1/1	case	SYCP1		intron_variant,intron_variant,intron_variant
178	52547817	C	T,T,T	0/1	control	SYCP1		intron_variant,intron_variant,intron_variant
178	52547817	C	T,T,T	0/1	control	SYCP1		intron_variant,intron_variant,intron_variant
178	52547817	C	T,T,T	0/1	control	SYCP1		intron_variant,intron_variant,intron_variant
179	52549250	C	T,T,T	1/1	case	SYCP1		intron_variant,intron_variant,intron_variant
179	52549250	C	T,T,T	0/1	control	SYCP1		intron_variant,intron_variant,intron_variant
179	52549250	C	T,T,T	0/1	control	SYCP1		intron_variant,intron_variant,intron_variant
179	52549250	C	T,T,T	0/1	control	SYCP1		intron_variant,intron_variant,intron_variant
180	52549599	C	T,T,T	1/1	case	SYCP1		intron_variant,intron_variant,intron_variant
180	52549599	C	T,T,T	0/1	control	SYCP1		intron_variant,intron_variant,intron_variant
180	52549599	C	T,T,T	0/1	control	SYCP1		intron_variant,intron_variant,intron_variant
180	52549599	C	T,T,T	0/1	control	SYCP1		intron_variant,intron_variant,intron_variant
181	52550051	G	GT,GT,GT	1/1	case	SYCP1		intron_variant,intron_variant,intron_variant
181	52550051	G	GT,GT,GT	0/1	control	SYCP1		intron_variant,intron_variant,intron_variant
181	52550051	G	GT,GT,GT	0/1	control	SYCP1		intron_variant,intron_variant,intron_variant
181	52550051	G	GT,GT,GT	0/1	control	SYCP1		intron_variant,intron_variant,intron_variant
182	52552246	A	T,T,T	1/1	case	SYCP1		intron_variant,intron_variant,intron_variant
182	52552246	A	T,T,T	0/1	control	SYCP1		intron_variant,intron_variant,intron_variant
182	52552246	A	T,T,T	0/1	control	SYCP1		intron_variant,intron_variant,intron_variant
182	52552246	A	T,T,T	0/1	control	SYCP1		intron_variant,intron_variant,intron_variant
183	52552319	TA	T,T,T	1/1	case	SYCP1		intron_variant,intron_variant,intron_variant
183	52552319	TA	T,T,T	0/1	control	SYCP1		intron_variant,intron_variant,intron_variant
183	52552319	TA	T,T,T	0/1	control	SYCP1		intron_variant,intron_variant,intron_variant
183	52552319	TA	T,T,T	0/1	control	SYCP1		intron_variant,intron_variant,intron_variant
184	52553047	G	A,A,A	1/1	case	SYCP1		intron_variant,intron_variant,intron_variant
184	52553047	G	A,A,A	0/1	control	SYCP1		intron_variant,intron_variant,intron_variant
184	52553047	G	A,A,A	0/1	control	SYCP1		intron_variant,intron_variant,intron_variant
184	52553047	G	A,A,A	0/1	control	SYCP1		intron_variant,intron_variant,intron_variant
185	52553084	C	T,T,T	1/1	case	SYCP1		intron_variant,intron_variant,intron_variant
185	52553084	C	T,T,T	0/1	control	SYCP1		intron_variant,intron_variant,intron_variant
185	52553084	C	T,T,T	0/1	control	SYCP1		intron_variant,intron_variant,intron_variant
185	52553084	C	T,T,T	0/1	control	SYCP1		intron_variant,intron_variant,intron_variant
186	52553387	A	T,T,T	1/1	case	SYCP1		intron_variant,intron_variant,intron_variant
186	52553387	A	T,T,T	0/1	control	SYCP1		intron_variant,intron_variant,intron_variant
186	52553387	A	T,T,T	0/1	control	SYCP1		intron_variant,intron_variant,intron_variant
186	52553387	A	T,T,T	0/1	control	SYCP1		intron_variant,intron_variant,intron_variant
187	52553392	ATATTT	A,A,A	1/1	case	SYCP1		intron_variant,intron_variant,intron_variant
187	52553392	ATATTT	A,A,A	0/1	control	SYCP1		intron_variant,intron_variant,intron_variant
187	52553392	ATATTT	A,A,A	0/1	control	SYCP1		intron_variant,intron_variant,intron_variant
187	52553392	ATATTT	A,A,A	0/1	control	SYCP1		intron_variant,intron_variant,intron_variant
188	52555526	C	A,A,A	1/1	case	SYCP1		intron_variant,intron_variant,intron_variant
188	52555526	C	A,A,A	0/1	control	SYCP1		intron_variant,intron_variant,intron_variant
188	52555526	C	A,A,A	0/1	control	SYCP1		intron_variant,intron_variant,intron_variant
188	52555526	C	A,A,A	0/1	control	SYCP1		intron_variant,intron_variant,intron_variant
189	52555607	T	A,A,A	1/1	case	SYCP1		intron_variant,intron_variant,intron_variant
189	52555607	T	A,A,A	0/1	control	SYCP1		intron_variant,intron_variant,intron_variant
189	52555607	T	A,A,A	0/1	control	SYCP1		intron_variant,intron_variant,intron_variant
189	52555607	T	A,A,A	0/1	control	SYCP1		intron_variant,intron_variant,intron_variant
190	52556495	T	C,C,C	1/1	case	SYCP1		intron_variant,intron_variant,intron_variant
190	52556495	T	C,C,C	0/1	control	SYCP1		intron_variant,intron_variant,intron_variant
190	52556495	T	C,C,C	0/1	control	SYCP1		intron_variant,intron_variant,intron_variant
190	52556495	T	C,C,C	0/1	control	SYCP1		intron_variant,intron_variant,intron_variant
191	52556992	ATTTG	A,A,A	1/1	case	SYCP1		intron_variant,intron_variant,intron_variant
191	52556992	ATTTG	A,A,A	0/1	control	SYCP1		intron_variant,intron_variant,intron_variant
191	52556992	ATTTG	A,A,A	0/1	control	SYCP1		intron_variant,intron_variant,intron_variant
191	52556992	ATTTG	A,A,A	0/1	control	SYCP1		intron_variant,intron_variant,intron_variant
192	52557761	AT	A,A,A	1/1	case	SYCP1		intron_variant,intron_variant,intron_variant
192	52557761	AT	A,A,A	0/1	control	SYCP1		intron_variant,intron_variant,intron_variant
192	52557761	AT	A,A,A	0/1	control	SYCP1		intron_variant,intron_variant,intron_variant
192	52557761	ATT	A,AT,A,AT,A,AT	0/2	control	SYCP1		intron_variant,intron_variant,intron_variant,intron_variant,intron_variant,intron_variant
193	52557847	AG	A,A,A	1/1	case	SYCP1		intron_variant,intron_variant,intron_variant
193	52557847	AG	A,A,A	0/1	control	SYCP1		intron_variant,intron_variant,intron_variant
193	52557847	AG	A,A,A	0/1	control	SYCP1		intron_variant,intron_variant,intron_variant
193	52557847	AG	A,A,A	0/1	control	SYCP1		intron_variant,intron_variant,intron_variant
194	52557850	A	C,C,C	1/1	case	SYCP1		intron_variant,intron_variant,intron_variant
194	52557850	A	C,C,C	0/1	control	SYCP1		intron_variant,intron_variant,intron_variant
194	52557850	A	C,C,C	0/1	control	SYCP1		intron_variant,intron_variant,intron_variant
194	52557850	AC	CC,A,CC,A,CC,A	1/2	control	SYCP1		intron_variant,intron_variant,intron_variant,intron_variant,intron_variant,intron_variant
195	52557853	G	GA,GA,GA	1/1	case	SYCP1		intron_variant,intron_variant,intron_variant
195	52557853	G	GA,GA,GA	0/1	control	SYCP1		intron_variant,intron_variant,intron_variant
195	52557853	G	GA,GA,GA	0/1	control	SYCP1		intron_variant,intron_variant,intron_variant
195	52557853	GCA	GACA,G,GACA,G,GACA,G	1/2	control	SYCP1		intron_variant,intron_variant,intron_variant,intron_variant,intron_variant,intron_variant
196	52557867	C	A,A,A	1/1	case	SYCP1		intron_variant,intron_variant,intron_variant
196	52557867	C	A,A,A	0/1	control	SYCP1		intron_variant,intron_variant,intron_variant
196	52557867	C	A,A,A	0/1	control	SYCP1		intron_variant,intron_variant,intron_variant
196	52557867	C	A,A,A	0/1	control	SYCP1		intron_variant,intron_variant,intron_variant
197	52558010	G	T,T,T	1/1	case	SYCP1		intron_variant,intron_variant,intron_variant
197	52558010	G	T,T,T	0/1	control	SYCP1		intron_variant,intron_variant,intron_variant
197	52558010	G	T,T,T	0/1	control	SYCP1		intron_variant,intron_variant,intron_variant
197	52558010	G	T,T,T	0/1	control	SYCP1		intron_variant,intron_variant,intron_variant
198	52558145	G	T,T,T	1/1	case	SYCP1		intron_variant,intron_variant,intron_variant
198	52558145	G	T,T,T	0/1	control	SYCP1		intron_variant,intron_variant,intron_variant
198	52558145	G	T,T,T	0/1	control	SYCP1		intron_variant,intron_variant,intron_variant
198	52558145	G	T,T,T	0/1	control	SYCP1		intron_variant,intron_variant,intron_variant
199	52558172	G	GC,GC,GC	1/1	case	SYCP1		intron_variant,intron_variant,intron_variant
199	52558172	G	GC,GC,GC	0/1	control	SYCP1		intron_variant,intron_variant,intron_variant
199	52558172	G	GC,GC,GC	0/1	control	SYCP1		intron_variant,intron_variant,intron_variant
199	52558172	G	GC,GC,GC	0/1	control	SYCP1		intron_variant,intron_variant,intron_variant
200	52558433	A	AC,AC,AC	1/1	case	SYCP1		intron_variant,intron_variant,intron_variant
200	52558433	A	AC,AC,AC	0/1	control	SYCP1		intron_variant,intron_variant,intron_variant
200	52558433	A	AC,AC,AC	0/1	control	SYCP1		intron_variant,intron_variant,intron_variant
200	52558433	A	AC,AC,AC	0/1	control	SYCP1		intron_variant,intron_variant,intron_variant
201	52558677	A	G,G,G	1/1	case	SYCP1		intron_variant,intron_variant,intron_variant
201	52558677	A	G,G,G	0/1	control	SYCP1		intron_variant,intron_variant,intron_variant
201	52558677	A	G,G,G	0/1	control	SYCP1		intron_variant,intron_variant,intron_variant
201	52558677	A	G,G,G	0/1	control	SYCP1		intron_variant,intron_variant,intron_variant
202	52558687	T	A,A,A	1/1	case	SYCP1		intron_variant,intron_variant,intron_variant
202	52558687	T	A,A,A	0/1	control	SYCP1		intron_variant,intron_variant,intron_variant
202	52558687	T	A,A,A	0/1	control	SYCP1		intron_variant,intron_variant,intron_variant
202	52558687	T	A,A,A	0/1	control	SYCP1		intron_variant,intron_variant,intron_variant
203	52558688	A	T,T,T	1/1	case	SYCP1		intron_variant,intron_variant,intron_variant
203	52558688	A	T,T,T	0/1	control	SYCP1		intron_variant,intron_variant,intron_variant
203	52558688	A	T,T,T	0/1	control	SYCP1		intron_variant,intron_variant,intron_variant
203	52558688	A	T,T,T	0/1	control	SYCP1		intron_variant,intron_variant,intron_variant
204	52558892	A	C,C,C	1/1	case	SYCP1		intron_variant,intron_variant,intron_variant
204	52558892	A	C,C,C	0/1	control	SYCP1		intron_variant,intron_variant,intron_variant
204	52558892	A	C,C,C	0/1	control	SYCP1		intron_variant,intron_variant,intron_variant
204	52558892	A	C,C,C	0/1	control	SYCP1		intron_variant,intron_variant,intron_variant
205	52559792	A	ATG,ATG,ATG	1/1	case	SYCP1		intron_variant,intron_variant,intron_variant
205	52559792	A	ATG,ATG,ATG	0/1	control	SYCP1		intron_variant,intron_variant,intron_variant
205	52559792	A	ATG,ATG,ATG	0/1	control	SYCP1		intron_variant,intron_variant,intron_variant
205	52559792	A	ATG,ATG,ATG	0/1	control	SYCP1		intron_variant,intron_variant,intron_variant
206	52559816	GGTGTGT	G,G,G	1/1	case	SYCP1		intron_variant,intron_variant,intron_variant
206	52559816	GGTGTGT	G,G,G	0/1	control	SYCP1		intron_variant,intron_variant,intron_variant
206	52559816	GGTGTGT	G,G,G	0/1	control	SYCP1		intron_variant,intron_variant,intron_variant
206	52559816	GGTGTGT	G,GGT,G,GGT,G,GGT	1/2	control	SYCP1		intron_variant,intron_variant,intron_variant,intron_variant,intron_variant,intron_variant
207	52560287	C	T,T,T	1/1	case	SYCP1		intron_variant,intron_variant,intron_variant
207	52560287	C	T,T,T	0/1	control	SYCP1		intron_variant,intron_variant,intron_variant
207	52560287	C	T,T,T	0/1	control	SYCP1		intron_variant,intron_variant,intron_variant
207	52560287	C	T,T,T	0/1	control	SYCP1		intron_variant,intron_variant,intron_variant
208	52560545	G	A,A,A	1/1	case	SYCP1		intron_variant,intron_variant,intron_variant
208	52560545	G	A,A,A	0/1	control	SYCP1		intron_variant,intron_variant,intron_variant
208	52560545	G	A,A,A	0/1	control	SYCP1		intron_variant,intron_variant,intron_variant
208	52560545	G	A,A,A	0/1	control	SYCP1		intron_variant,intron_variant,intron_variant
209	52561370	A	G,G,G	1/1	case	SYCP1		intron_variant,intron_variant,intron_variant
209	52561370	A	G,G,G	0/1	control	SYCP1		intron_variant,intron_variant,intron_variant
209	52561370	A	G,G,G	0/1	control	SYCP1		intron_variant,intron_variant,intron_variant
209	52561370	A	G,G,G	0/1	control	SYCP1		intron_variant,intron_variant,intron_variant
210	52561899	G	A,A,A	1/1	case	SYCP1		intron_variant,intron_variant,intron_variant
210	52561899	G	A,A,A	0/1	control	SYCP1		intron_variant,intron_variant,intron_variant
210	52561899	G	A,A,A	0/1	control	SYCP1		intron_variant,intron_variant,intron_variant
210	52561899	G	A,A,A	0/1	control	SYCP1		intron_variant,intron_variant,intron_variant
211	52562622	T	C,C,C	1/1	case	SYCP1		intron_variant,intron_variant,intron_variant
211	52562622	T	C,C,C	0/1	control	SYCP1		intron_variant,intron_variant,intron_variant
211	52562622	T	C,C,C	0/1	control	SYCP1		intron_variant,intron_variant,intron_variant
211	52562622	T	C,C,C	0/1	control	SYCP1		intron_variant,intron_variant,intron_variant
212	52563915	C	CT,CT,CT	1/1	case	SYCP1		intron_variant,intron_variant,intron_variant
212	52563915	C	CT,CT,CT	0/1	control	SYCP1		intron_variant,intron_variant,intron_variant
212	52563915	C	CT,CT,CT	0/1	control	SYCP1		intron_variant,intron_variant,intron_variant
212	52563915	C	CT,CT,CT	0/1	control	SYCP1		intron_variant,intron_variant,intron_variant
213	52564424	A	T,T,T	1/1	case	SYCP1		intron_variant,intron_variant,intron_variant
213	52564424	A	T,T,T	0/1	control	SYCP1		intron_variant,intron_variant,intron_variant
213	52564424	A	T,T,T	0/1	control	SYCP1		intron_variant,intron_variant,intron_variant
213	52564424	A	T,T,T	0/1	control	SYCP1		intron_variant,intron_variant,intron_variant
214	52564623	A	T,T,T	1/1	case	SYCP1		intron_variant,intron_variant,intron_variant
214	52564623	A	T,T,T	0/1	control	SYCP1		intron_variant,intron_variant,intron_variant
214	52564623	A	T,T,T	0/1	control	SYCP1		intron_variant,intron_variant,intron_variant
214	52564623	A	T,T,T	0/1	control	SYCP1		intron_variant,intron_variant,intron_variant
215	52564865	G	A,A,A	1/1	case	SYCP1		synonymous_variant,synonymous_variant,synonymous_variant
215	52564865	G	A,A,A	0/1	control	SYCP1		synonymous_variant,synonymous_variant,synonymous_variant
215	52564865	G	A,A,A	0/1	control	SYCP1		synonymous_variant,synonymous_variant,synonymous_variant
215	52564865	G	A,A,A	0/1	control	SYCP1		synonymous_variant,synonymous_variant,synonymous_variant
216	52565972	G	A,A,A	1/1	case	SYCP1		intron_variant,intron_variant,intron_variant
216	52565972	G	A,A,A	0/1	control	SYCP1		intron_variant,intron_variant,intron_variant
216	52565972	G	A,A,A	0/1	control	SYCP1		intron_variant,intron_variant,intron_variant
216	52565972	G	A,A,A	0/1	control	SYCP1		intron_variant,intron_variant,intron_variant
217	52566118	TTTAAAATTTGTTACTTCA	T,T,T	1/1	case	SYCP1		intron_variant,intron_variant,intron_variant
217	52566118	TTTAAAATTTGTTACTTCA	T,T,T	0/1	control	SYCP1		intron_variant,intron_variant,intron_variant
217	52566118	TTTAAAATTTGTTACTTCA	T,T,T	0/1	control	SYCP1		intron_variant,intron_variant,intron_variant
217	52566118	TTTAAAATTTGTTACTTCA	T,T,T	0/1	control	SYCP1		intron_variant,intron_variant,intron_variant
218	52566143	TA	T,T,T	1/1	case	SYCP1		intron_variant,intron_variant,intron_variant
218	52566143	TA	T,T,T	0/1	control	SYCP1		intron_variant,intron_variant,intron_variant
218	52566143	TA	T,T,T	0/1	control	SYCP1		intron_variant,intron_variant,intron_variant
218	52566143	TA	T,T,T	0/1	control	SYCP1		intron_variant,intron_variant,intron_variant
219	52566359	G	A,A,A	1/1	case	SYCP1		intron_variant,intron_variant,intron_variant
219	52566359	G	A,A,A	0/1	control	SYCP1		intron_variant,intron_variant,intron_variant
219	52566359	G	A,A,A	0/1	control	SYCP1		intron_variant,intron_variant,intron_variant
219	52566359	G	A,A,A	0/1	control	SYCP1		intron_variant,intron_variant,intron_variant
220	52567201	G	A,A,A	1/1	case	SYCP1		intron_variant,intron_variant,intron_variant
220	52567201	G	A,A,A	0/1	control	SYCP1		intron_variant,intron_variant,intron_variant
220	52567201	G	A,A,A	0/1	control	SYCP1		intron_variant,intron_variant,intron_variant
220	52567201	G	A,A,A	0/1	control	SYCP1		intron_variant,intron_variant,intron_variant
221	52567743	G	A,A,A	1/1	case	SYCP1		intron_variant,intron_variant,intron_variant
221	52567743	G	A,A,A	0/1	control	SYCP1		intron_variant,intron_variant,intron_variant
221	52567743	G	A,A,A	0/1	control	SYCP1		intron_variant,intron_variant,intron_variant
221	52567743	G	A,A,A	0/1	control	SYCP1		intron_variant,intron_variant,intron_variant
222	52568499	GTTTTT	G,G,G	1/1	case	SYCP1		intron_variant,intron_variant,intron_variant
222	52568499	GTTTTT	G,G,G	0/1	control	SYCP1		intron_variant,intron_variant,intron_variant
222	52568499	GTTTTT	G,G,G	0/1	control	SYCP1		intron_variant,intron_variant,intron_variant
222	52568499	GTTTTT	G,G,G	0/1	control	SYCP1		intron_variant,intron_variant,intron_variant
223	52568556	C	G,G,G	1/1	case	SYCP1		intron_variant,intron_variant,intron_variant
223	52568556	C	G,G,G	0/1	control	SYCP1		intron_variant,intron_variant,intron_variant
223	52568556	C	G,G,G	0/1	control	SYCP1		intron_variant,intron_variant,intron_variant
223	52568556	C	G,G,G	0/1	control	SYCP1		intron_variant,intron_variant,intron_variant
224	52568558	A	G,G,G	1/1	case	SYCP1		intron_variant,intron_variant,intron_variant
224	52568558	A	G,G,G	0/1	control	SYCP1		intron_variant,intron_variant,intron_variant
224	52568558	A	G,G,G	0/1	control	SYCP1		intron_variant,intron_variant,intron_variant
224	52568558	A	G,G,G	0/1	control	SYCP1		intron_variant,intron_variant,intron_variant
225	52569491	TC	T,T,T	1/1	case	SYCP1		intron_variant,intron_variant,intron_variant
225	52569491	TC	T,T,T	0/1	control	SYCP1		intron_variant,intron_variant,intron_variant
225	52569491	TC	T,T,T	0/1	control	SYCP1		intron_variant,intron_variant,intron_variant
225	52569491	TC	T,T,T	0/1	control	SYCP1		intron_variant,intron_variant,intron_variant
226	52570082	A	G,G,G	1/1	case	SYCP1		intron_variant,intron_variant,intron_variant
226	52570082	A	G,G,G	0/1	control	SYCP1		intron_variant,intron_variant,intron_variant
226	52570082	A	G,G,G	0/1	control	SYCP1		intron_variant,intron_variant,intron_variant
226	52570082	A	G,G,G	0/1	control	SYCP1		intron_variant,intron_variant,intron_variant
227	52570725	C	T,T,T	1/1	case	SYCP1		intron_variant,intron_variant,intron_variant
227	52570725	C	T,T,T	0/1	control	SYCP1		intron_variant,intron_variant,intron_variant
227	52570725	C	T,T,T	0/1	control	SYCP1		intron_variant,intron_variant,intron_variant
227	52570725	C	T,T,T	0/1	control	SYCP1		intron_variant,intron_variant,intron_variant
228	52571668	C	T,T,T	1/1	case	SYCP1		intron_variant,intron_variant,intron_variant
228	52571668	C	T,T,T	0/1	control	SYCP1		intron_variant,intron_variant,intron_variant
228	52571668	C	T,T,T	0/1	control	SYCP1		intron_variant,intron_variant,intron_variant
228	52571668	C	T,T,T	0/1	control	SYCP1		intron_variant,intron_variant,intron_variant
229	52574061	T	A,A,A	1/1	case	SYCP1		intron_variant,intron_variant,intron_variant
229	52574061	T	A,A,A	0/1	case	SYCP1		intron_variant,intron_variant,intron_variant
229	52574061	T	A,A,A	0/1	control	SYCP1		intron_variant,intron_variant,intron_variant
229	52574061	T	A,A,A	0/1	control	SYCP1		intron_variant,intron_variant,intron_variant
229	52574061	T	A,A,A	0/1	control	SYCP1		intron_variant,intron_variant,intron_variant
230	52574063	T	A,A,A	1/1	case	SYCP1		intron_variant,intron_variant,intron_variant
230	52574063	T	A,A,A	0/1	case	SYCP1		intron_variant,intron_variant,intron_variant
230	52574063	T	A,A,A	0/1	control	SYCP1		intron_variant,intron_variant,intron_variant
230	52574063	T	A,A,A	0/1	control	SYCP1		intron_variant,intron_variant,intron_variant
230	52574063	T	A,A,A	0/1	control	SYCP1		intron_variant,intron_variant,intron_variant
231	52574065	T	A,A,A	1/1	case	SYCP1		intron_variant,intron_variant,intron_variant
231	52574065	T	A,A,A	0/1	case	SYCP1		intron_variant,intron_variant,intron_variant
231	52574065	T	A,A,A	0/1	control	SYCP1		intron_variant,intron_variant,intron_variant
231	52574065	T	A,A,A	0/1	control	SYCP1		intron_variant,intron_variant,intron_variant
231	52574065	T	A,A,A	0/1	control	SYCP1		intron_variant,intron_variant,intron_variant
232	52574403	AG	A,A,A	1/1	case	SYCP1		intron_variant,intron_variant,intron_variant
232	52574403	AG	A,A,A	0/1	control	SYCP1		intron_variant,intron_variant,intron_variant
232	52574403	AG	A,A,A	0/1	control	SYCP1		intron_variant,intron_variant,intron_variant
232	52574403	AG	A,A,A	0/1	control	SYCP1		intron_variant,intron_variant,intron_variant
233	52574521	T	C,C,C	1/1	case	SYCP1		intron_variant,intron_variant,intron_variant
233	52574521	T	C,C,C	0/1	control	SYCP1		intron_variant,intron_variant,intron_variant
233	52574521	T	C,C,C	0/1	control	SYCP1		intron_variant,intron_variant,intron_variant
233	52574521	T	C,C,C	0/1	control	SYCP1		intron_variant,intron_variant,intron_variant
234	52574527	AT	A,A,A	1/1	case	SYCP1		intron_variant,intron_variant,intron_variant
234	52574527	AT	A,A,A	0/1	control	SYCP1		intron_variant,intron_variant,intron_variant
234	52574527	AT	A,A,A	0/1	control	SYCP1		intron_variant,intron_variant,intron_variant
234	52574527	AT	A,A,A	0/1	control	SYCP1		intron_variant,intron_variant,intron_variant
235	52574529	GA	G,G,G	1/1	case	SYCP1		intron_variant,intron_variant,intron_variant
235	52574529	GA	G,G,G	0/1	control	SYCP1		intron_variant,intron_variant,intron_variant
235	52574529	GA	G,G,G	0/1	control	SYCP1		intron_variant,intron_variant,intron_variant
235	52574529	GA	G,G,G	0/1	control	SYCP1		intron_variant,intron_variant,intron_variant
236	52574728	C	T,T,T	1/1	case	SYCP1		intron_variant,intron_variant,intron_variant
236	52574728	C	T,T,T	0/1	control	SYCP1		intron_variant,intron_variant,intron_variant
236	52574728	C	T,T,T	0/1	control	SYCP1		intron_variant,intron_variant,intron_variant
236	52574728	C	T,T,T	0/1	control	SYCP1		intron_variant,intron_variant,intron_variant
237	52574982	C	CTTCATTTTAGAGTATTTCTTTTTTTTTATTTTTTTTATTTTTTTATTTTATTTTT,CTTCATTTTAGAGTATTTCTTTTTTTTTATTTTTTTTATTTTTTTATTTTATTTTT,CTTCATTTTAGAGTATTTCTTTTTTTTTATTTTTTTTATTTTTTTATTTTATTTTT	1/1	case	SYCP1		intron_variant,intron_variant,intron_variant
237	52574982	C	CTTCATTTTAGAGTATTTCTTTTTTTTTATTTTTTTTATTTTTTTATTTTATTTTT,CTTCATTTTAGAGTATTTCTTTTTTTTTATTTTTTTTATTTTTTTATTTTATTTTT,CTTCATTTTAGAGTATTTCTTTTTTTTTATTTTTTTTATTTTTTTATTTTATTTTT	0/1	control	SYCP1		intron_variant,intron_variant,intron_variant
237	52574982	C	CTTCATTTTAGAGTATTTCTTTTTTTTTATTTTTTTTATTTTTTTATTTTATTTTT,CTTCATTTTAGAGTATTTCTTTTTTTTTATTTTTTTTATTTTTTTATTTTATTTTT,CTTCATTTTAGAGTATTTCTTTTTTTTTATTTTTTTTATTTTTTTATTTTATTTTT	0/1	control	SYCP1		intron_variant,intron_variant,intron_variant
237	52574982	C	CTTCATTTTAGAGTATTTCTTTTTTTTTATTTTTTTTATTTTTTTATTTTATTTTT,CTTCATTTTAGAGTATTTCTTTTTTTTTATTTTTTTTATTTTTTTATTTTATTTTT,CTTCATTTTAGAGTATTTCTTTTTTTTTATTTTTTTTATTTTTTTATTTTATTTTT	0/1	control	SYCP1		intron_variant,intron_variant,intron_variant
238	52575266	C	A,A,A	1/1	case	SYCP1		intron_variant,intron_variant,intron_variant
238	52575266	C	A,A,A	0/1	control	SYCP1		intron_variant,intron_variant,intron_variant
238	52575266	C	A,A,A	0/1	control	SYCP1		intron_variant,intron_variant,intron_variant
238	52575266	C	A,A,A	0/1	control	SYCP1		intron_variant,intron_variant,intron_variant
239	52576528	C	T,T,T	1/1	case	SYCP1		intron_variant,intron_variant,intron_variant
239	52576528	C	T,T,T	0/1	control	SYCP1		intron_variant,intron_variant,intron_variant
239	52576528	C	T,T,T	0/1	control	SYCP1		intron_variant,intron_variant,intron_variant
239	52576528	C	T,T,T	0/1	control	SYCP1		intron_variant,intron_variant,intron_variant
240	52577849	G	A,A,A	1/1	case	SYCP1		intron_variant,intron_variant,intron_variant
240	52577849	G	A,A,A	0/1	control	SYCP1		intron_variant,intron_variant,intron_variant
240	52577849	G	A,A,A	0/1	control	SYCP1		intron_variant,intron_variant,intron_variant
240	52577849	G	A,A,A	0/1	control	SYCP1		intron_variant,intron_variant,intron_variant
241	52578091	G	A,A,A	1/1	case	SYCP1		intron_variant,intron_variant,intron_variant
241	52578091	G	A,A,A	0/1	control	SYCP1		intron_variant,intron_variant,intron_variant
241	52578091	G	A,A,A	0/1	control	SYCP1		intron_variant,intron_variant,intron_variant
241	52578091	G	A,A,A	0/1	control	SYCP1		intron_variant,intron_variant,intron_variant
242	52579278	CT	C,C,C	1/1	case	SYCP1		intron_variant,intron_variant,intron_variant
242	52579278	CT	C,C,C	0/1	control	SYCP1		intron_variant,intron_variant,intron_variant
242	52579278	CT	C,C,C	0/1	control	SYCP1		intron_variant,intron_variant,intron_variant
242	52579278	CT	C,C,C	0/1	control	SYCP1		intron_variant,intron_variant,intron_variant
243	52580391	C	A,A,A	1/1	case	SYCP1		intron_variant,intron_variant,intron_variant
243	52580391	C	A,A,A	0/1	control	SYCP1		intron_variant,intron_variant,intron_variant
243	52580391	C	A,A,A	0/1	control	SYCP1		intron_variant,intron_variant,intron_variant
243	52580391	C	A,A,A	0/1	control	SYCP1		intron_variant,intron_variant,intron_variant
244	52581453	C	T,T,T	1/1	case	SYCP1		intron_variant,intron_variant,intron_variant
244	52581453	C	T,T,T	0/1	control	SYCP1		intron_variant,intron_variant,intron_variant
244	52581453	C	T,T,T	0/1	control	SYCP1		intron_variant,intron_variant,intron_variant
244	52581453	C	T,T,T	0/1	control	SYCP1		intron_variant,intron_variant,intron_variant
245	52581883	CTT	C,C,C	1/1	case	SYCP1		intron_variant,intron_variant,intron_variant
245	52581883	CTT	C,C,C	0/1	control	SYCP1		intron_variant,intron_variant,intron_variant
245	52581883	CTT	C,C,C	0/1	control	SYCP1		intron_variant,intron_variant,intron_variant
245	52581883	CTT	C,C,C	0/1	control	SYCP1		intron_variant,intron_variant,intron_variant
246	52582494	C	T,T,T	1/1	case	SYCP1		intron_variant,intron_variant,intron_variant
246	52582494	C	T,T,T	0/1	control	SYCP1		intron_variant,intron_variant,intron_variant
246	52582494	C	T,T,T	0/1	control	SYCP1		intron_variant,intron_variant,intron_variant
246	52582494	C	T,T,T	0/1	control	SYCP1		intron_variant,intron_variant,intron_variant
247	52582499	T	A,A,A	1/1	case	SYCP1		intron_variant,intron_variant,intron_variant
247	52582499	T	A,A,A	0/1	control	SYCP1		intron_variant,intron_variant,intron_variant
247	52582499	T	A,A,A	0/1	control	SYCP1		intron_variant,intron_variant,intron_variant
247	52582499	T	A,A,A	0/1	control	SYCP1		intron_variant,intron_variant,intron_variant
248	52582731	T	TTCTG,TTCTG,TTCTG	1/1	case	SYCP1		intron_variant,intron_variant,intron_variant
248	52582731	T	TTCTG,TTCTG,TTCTG	0/1	control	SYCP1		intron_variant,intron_variant,intron_variant
248	52582731	T	TTCTG,TTCTG,TTCTG	0/1	control	SYCP1		intron_variant,intron_variant,intron_variant
248	52582731	T	TTCTG,TTCTG,TTCTG	0/1	control	SYCP1		intron_variant,intron_variant,intron_variant
249	52583618	T	A,A,A	1/1	case	SYCP1		intron_variant,intron_variant,intron_variant
249	52583618	T	A,A,A	0/1	control	SYCP1		intron_variant,intron_variant,intron_variant
249	52583618	T	A,A,A	0/1	control	SYCP1		intron_variant,intron_variant,intron_variant
249	52583618	T	A,A,A	0/1	control	SYCP1		intron_variant,intron_variant,intron_variant
250	52583620	C	T,T,T	1/1	case	SYCP1		intron_variant,intron_variant,intron_variant
250	52583620	C	T,T,T	0/1	control	SYCP1		intron_variant,intron_variant,intron_variant
250	52583620	C	T,T,T	0/1	control	SYCP1		intron_variant,intron_variant,intron_variant
250	52583620	C	T,T,T	0/1	control	SYCP1		intron_variant,intron_variant,intron_variant
251	52584325	G	GGA,GGA,GGA	1/1	case	SYCP1		intron_variant,intron_variant,intron_variant
251	52584325	G	GGA,GGA,GGA	0/1	control	SYCP1		intron_variant,intron_variant,intron_variant
251	52584325	G	GGA,GGA,GGA	0/1	control	SYCP1		intron_variant,intron_variant,intron_variant
251	52584325	G	GGA,GGA,GGA	0/1	control	SYCP1		intron_variant,intron_variant,intron_variant
252	52585383	G	A,A,A	1/1	case	SYCP1		intron_variant,intron_variant,intron_variant
252	52585383	G	A,A,A	0/1	control	SYCP1		intron_variant,intron_variant,intron_variant
252	52585383	G	A,A,A	0/1	control	SYCP1		intron_variant,intron_variant,intron_variant
252	52585383	G	A,A,A	0/1	control	SYCP1		intron_variant,intron_variant,intron_variant
253	52585915	T	C,C,C	1/1	case	SYCP1		intron_variant,intron_variant,intron_variant
253	52585915	T	C,C,C	0/1	control	SYCP1		intron_variant,intron_variant,intron_variant
253	52585915	T	C,C,C	0/1	control	SYCP1		intron_variant,intron_variant,intron_variant
253	52585915	T	C,C,C	0/1	control	SYCP1		intron_variant,intron_variant,intron_variant
254	52585951	T	G,G,G	1/1	case	SYCP1		intron_variant,intron_variant,intron_variant
254	52585951	T	G,G,G	0/1	control	SYCP1		intron_variant,intron_variant,intron_variant
254	52585951	T	G,G,G	0/1	control	SYCP1		intron_variant,intron_variant,intron_variant
254	52585951	T	G,G,G	0/1	control	SYCP1		intron_variant,intron_variant,intron_variant
255	52586682	G	A,A,A	1/1	case	SYCP1		intron_variant,intron_variant,intron_variant
255	52586682	G	A,A,A	0/1	control	SYCP1		intron_variant,intron_variant,intron_variant
255	52586682	G	A,A,A	0/1	control	SYCP1		intron_variant,intron_variant,intron_variant
255	52586682	G	A,A,A	0/1	control	SYCP1		intron_variant,intron_variant,intron_variant
256	52587541	C	T,T,T	1/1	case	SYCP1		intron_variant,intron_variant,intron_variant
256	52587541	C	T,T,T	0/1	control	SYCP1		intron_variant,intron_variant,intron_variant
256	52587541	C	T,T,T	0/1	control	SYCP1		intron_variant,intron_variant,intron_variant
256	52587541	C	T,T,T	0/1	control	SYCP1		intron_variant,intron_variant,intron_variant
257	52590248	T	TTAGGTGTAAAGTTGCAAATGGGATCAATCAACACCCTCCAGCAACTCTCAG,TTAGGTGTAAAGTTGCAAATGGGATCAATCAACACCCTCCAGCAACTCTCAG,TTAGGTGTAAAGTTGCAAATGGGATCAATCAACACCCTCCAGCAACTCTCAG	1/1	case	SYCP1		intron_variant,intron_variant,intron_variant
257	52590248	T	TTAGGTGTAAAGTTGCAAATGGGATCAATCAACACCCTCCAGCAACTCTCAG,TTAGGTGTAAAGTTGCAAATGGGATCAATCAACACCCTCCAGCAACTCTCAG,TTAGGTGTAAAGTTGCAAATGGGATCAATCAACACCCTCCAGCAACTCTCAG	0/1	control	SYCP1		intron_variant,intron_variant,intron_variant
257	52590248	T	TTAGGTGTAAAGTTGCAAATGGGATCAATCAACACCCTCCAGCAACTCTCAG,TTAGGTGTAAAGTTGCAAATGGGATCAATCAACACCCTCCAGCAACTCTCAG,TTAGGTGTAAAGTTGCAAATGGGATCAATCAACACCCTCCAGCAACTCTCAG	0/1	control	SYCP1		intron_variant,intron_variant,intron_variant
257	52590248	T	TTAGGTGTAAAGTTGCAAATGGGATCAATCAACACCCTCCAGCAACTCTCAG,TTAGGTGTAAAGTTGCAAATGGGATCAATCAACACCCTCCAGCAACTCTCAG,TTAGGTGTAAAGTTGCAAATGGGATCAATCAACACCCTCCAGCAACTCTCAG	0/1	control	SYCP1		intron_variant,intron_variant,intron_variant
258	52590528	C	T,T,T	1/1	case	SYCP1		intron_variant,intron_variant,intron_variant
258	52590528	C	T,T,T	0/1	case	SYCP1		intron_variant,intron_variant,intron_variant
258	52590528	C	T,T,T	0/1	control	SYCP1		intron_variant,intron_variant,intron_variant
258	52590528	C	T,T,T	0/1	control	SYCP1		intron_variant,intron_variant,intron_variant
258	52590528	C	T,T,T	0/1	control	SYCP1		intron_variant,intron_variant,intron_variant
259	52592404	C	G,G,G	1/1	case	SYCP1		intron_variant,intron_variant,intron_variant
259	52592404	C	G,G,G	0/1	control	SYCP1		intron_variant,intron_variant,intron_variant
259	52592404	C	G,G,G	0/1	control	SYCP1		intron_variant,intron_variant,intron_variant
259	52592404	C	G,G,G	0/1	control	SYCP1		intron_variant,intron_variant,intron_variant
260	52592524	T	C,C,C	1/1	case	SYCP1		intron_variant,intron_variant,intron_variant
260	52592524	T	C,C,C	0/1	control	SYCP1		intron_variant,intron_variant,intron_variant
260	52592524	T	C,C,C	0/1	control	SYCP1		intron_variant,intron_variant,intron_variant
260	52592524	T	C,C,C	0/1	control	SYCP1		intron_variant,intron_variant,intron_variant
261	52594875	A	C,C,C	1/1	case	SYCP1		intron_variant,intron_variant,intron_variant
261	52594875	A	C,C,C	0/1	control	SYCP1		intron_variant,intron_variant,intron_variant
261	52594875	A	C,C,C	0/1	control	SYCP1		intron_variant,intron_variant,intron_variant
261	52594875	A	C,C,C	0/1	control	SYCP1		intron_variant,intron_variant,intron_variant
262	52595295	TA	T,T,T	1/1	case	SYCP1		intron_variant,intron_variant,intron_variant
262	52595295	TA	T,T,T	0/1	control	SYCP1		intron_variant,intron_variant,intron_variant
262	52595295	TA	T,T,T	0/1	control	SYCP1		intron_variant,intron_variant,intron_variant
262	52595295	TA	T,T,T	0/1	control	SYCP1		intron_variant,intron_variant,intron_variant
263	52595633	G	A,A,A	1/1	case	SYCP1		intron_variant,intron_variant,intron_variant
263	52595633	G	A,A,A	0/1	control	SYCP1		intron_variant,intron_variant,intron_variant
263	52595633	G	A,A,A	0/1	control	SYCP1		intron_variant,intron_variant,intron_variant
263	52595633	G	A,A,A	0/1	control	SYCP1		intron_variant,intron_variant,intron_variant
264	52597111	T	TA,TAA,TA,TAA,TA,TAA	1/1	case	SYCP1		intron_variant,intron_variant,intron_variant,intron_variant,intron_variant,intron_variant
264	52597111	T	TA,TA,TA	1/1	case	SYCP1		intron_variant,intron_variant,intron_variant
264	52597111	T	TA,TA,TA	0/1	control	SYCP1		intron_variant,intron_variant,intron_variant
264	52597111	T	TA,TA,TA	0/1	control	SYCP1		intron_variant,intron_variant,intron_variant
264	52597111	T	TA,TAAAA,TA,TAAAA,TA,TAAAA	1/2	control	SYCP1		intron_variant,intron_variant,intron_variant,intron_variant,intron_variant,intron_variant
265	52598709	T	TTA,TTA,TTA	1/1	case	SYCP1		intron_variant,intron_variant,intron_variant
265	52598709	T	TTA,TTA,TTA	0/1	control	SYCP1		intron_variant,intron_variant,intron_variant
265	52598709	T	TTA,TTA,TTA	0/1	control	SYCP1		intron_variant,intron_variant,intron_variant
265	52598709	T	TTA,TTA,TTA	0/1	control	SYCP1		intron_variant,intron_variant,intron_variant
266	52598922	G	A,A,A	1/1	case	SYCP1		intron_variant,intron_variant,intron_variant
266	52598922	G	A,A,A	0/1	control	SYCP1		intron_variant,intron_variant,intron_variant
266	52598922	G	A,A,A	0/1	control	SYCP1		intron_variant,intron_variant,intron_variant
266	52598922	G	A,A,A	0/1	control	SYCP1		intron_variant,intron_variant,intron_variant
267	52599360	G	A,A,A	1/1	case	SYCP1		intron_variant,intron_variant,intron_variant
267	52599360	G	A,A,A	0/1	control	SYCP1		intron_variant,intron_variant,intron_variant
267	52599360	G	A,A,A	0/1	control	SYCP1		intron_variant,intron_variant,intron_variant
267	52599360	G	A,A,A	0/1	control	SYCP1		intron_variant,intron_variant,intron_variant
268	52601449	GA	G,G,G	1/1	case	SYCP1		intron_variant,intron_variant,intron_variant
268	52601449	GA	G,G,G	0/1	control	SYCP1		intron_variant,intron_variant,intron_variant
268	52601449	GA	G,G,G	0/1	control	SYCP1		intron_variant,intron_variant,intron_variant
268	52601449	GA	G,G,G	0/1	control	SYCP1		intron_variant,intron_variant,intron_variant
269	52602161	A	T,T,T	1/1	case	SYCP1		intron_variant,intron_variant,intron_variant
269	52602161	A	T,T,T	0/1	control	SYCP1		intron_variant,intron_variant,intron_variant
269	52602161	A	T,T,T	0/1	control	SYCP1		intron_variant,intron_variant,intron_variant
269	52602161	A	T,T,T	0/1	control	SYCP1		intron_variant,intron_variant,intron_variant
270	52602319	T	C,C,C	1/1	case	SYCP1		intron_variant,intron_variant,intron_variant
270	52602319	T	C,C,C	0/1	control	SYCP1		intron_variant,intron_variant,intron_variant
270	52602319	T	C,C,C	0/1	control	SYCP1		intron_variant,intron_variant,intron_variant
270	52602319	T	C,C,C	0/1	control	SYCP1		intron_variant,intron_variant,intron_variant
271	52603714	C	T,T,T	1/1	case	SYCP1		3_prime_UTR_variant,intron_variant,intron_variant
271	52603714	C	T,T,T	0/1	control	SYCP1		3_prime_UTR_variant,intron_variant,intron_variant
271	52603714	C	T,T,T	0/1	control	SYCP1		3_prime_UTR_variant,intron_variant,intron_variant
271	52603714	C	T,T,T	0/1	control	SYCP1		3_prime_UTR_variant,intron_variant,intron_variant
272	52603749	A	G,G,G	1/1	case	SYCP1		3_prime_UTR_variant,intron_variant,intron_variant
272	52603749	A	G,G,G	0/1	control	SYCP1		3_prime_UTR_variant,intron_variant,intron_variant
272	52603749	A	G,G,G	0/1	control	SYCP1		3_prime_UTR_variant,intron_variant,intron_variant
272	52603749	A	G,G,G	0/1	control	SYCP1		3_prime_UTR_variant,intron_variant,intron_variant
273	52604753	T	A,A,A	1/1	case	SYCP1		downstream_gene_variant,intron_variant,intron_variant
273	52604753	T	A,A,A	0/1	control	SYCP1		downstream_gene_variant,intron_variant,intron_variant
273	52604753	T	A,A,A	0/1	control	SYCP1		downstream_gene_variant,intron_variant,intron_variant
273	52604753	T	A,A,A	0/1	control	SYCP1		downstream_gene_variant,intron_variant,intron_variant
274	52605285	G	A,A,A	1/1	case	SYCP1		downstream_gene_variant,intron_variant,intron_variant
274	52605285	G	A,A,A	0/1	control	SYCP1		downstream_gene_variant,intron_variant,intron_variant
274	52605285	G	A,A,A	0/1	control	SYCP1		downstream_gene_variant,intron_variant,intron_variant
274	52605285	G	A,A,A	0/1	control	SYCP1		downstream_gene_variant,intron_variant,intron_variant
275	52605450	G	A,A,A	1/1	case	SYCP1		downstream_gene_variant,intron_variant,intron_variant
275	52605450	G	A,A,A	0/1	control	SYCP1		downstream_gene_variant,intron_variant,intron_variant
275	52605450	G	A,A,A	0/1	control	SYCP1		downstream_gene_variant,intron_variant,intron_variant
275	52605450	G	A,A,A	0/1	control	SYCP1		downstream_gene_variant,intron_variant,intron_variant
276	52607637	GAGAAAAAA	G,G,G	1/1	case	SYCP1		downstream_gene_variant,intron_variant,intron_variant
276	52607637	GAGAAAAAA	G,G,G	0/1	control	SYCP1		downstream_gene_variant,intron_variant,intron_variant
276	52607637	GAGAAAAAA	G,G,G	0/1	control	SYCP1		downstream_gene_variant,intron_variant,intron_variant
276	52607637	GAGAAAAAA	G,G,G	0/1	control	SYCP1		downstream_gene_variant,intron_variant,intron_variant
277	52608177	T	C,C,C	1/1	case	SYCP1		downstream_gene_variant,intron_variant,intron_variant
277	52608177	T	C,C,C	0/1	control	SYCP1		downstream_gene_variant,intron_variant,intron_variant
277	52608177	T	C,C,C	0/1	control	SYCP1		downstream_gene_variant,intron_variant,intron_variant
277	52608177	T	C,C,C	0/1	control	SYCP1		downstream_gene_variant,intron_variant,intron_variant
278	52608268	A	G,G,G	1/1	case	SYCP1		downstream_gene_variant,intron_variant,intron_variant
278	52608268	A	G,G,G	0/1	control	SYCP1		downstream_gene_variant,intron_variant,intron_variant
278	52608268	A	G,G,G	0/1	control	SYCP1		downstream_gene_variant,intron_variant,intron_variant
278	52608268	A	G,G,G	0/1	control	SYCP1		downstream_gene_variant,intron_variant,intron_variant
279	52608275	T	C,C,C	1/1	case	SYCP1		downstream_gene_variant,intron_variant,intron_variant
279	52608275	T	C,C,C	0/1	control	SYCP1		downstream_gene_variant,intron_variant,intron_variant
279	52608275	T	C,C,C	0/1	control	SYCP1		downstream_gene_variant,intron_variant,intron_variant
279	52608275	T	C,C,C	0/1	control	SYCP1		downstream_gene_variant,intron_variant,intron_variant
280	52608789	AAAAGAAAAGCAAAGCAAAGCAAAGC	A,A,A	1/1	case	SYCP1		downstream_gene_variant,intron_variant,intron_variant
280	52608789	AAAAGAAAAGCAAAGCAAAGCAAAGC	A,A,A	0/1	control	SYCP1		downstream_gene_variant,intron_variant,intron_variant
280	52608789	AAAAGAAAAGCAAAGCAAAGCAAAGC	A,A,A	0/1	control	SYCP1		downstream_gene_variant,intron_variant,intron_variant
280	52608789	AAAAGAAAAGCAAAGCAAAGCAAAGC	A,A,A	0/1	control	SYCP1		downstream_gene_variant,intron_variant,intron_variant
281	52609077	G	A,A	1/1	case	SYCP1		intron_variant,intron_variant
281	52609077	G	A,A	0/1	control	SYCP1		intron_variant,intron_variant
281	52609077	G	A,A	0/1	control	SYCP1		intron_variant,intron_variant
281	52609077	G	A,A	0/1	control	SYCP1		intron_variant,intron_variant
282	52610048	G	GATTTTATTT,GATTTTATTT	1/1	case	SYCP1		intron_variant,intron_variant
282	52610048	G	GATTTTATTT,GATTTTATTT	0/1	control	SYCP1		intron_variant,intron_variant
282	52610048	G	GATTTTATTT,GATTTTATTT	0/1	control	SYCP1		intron_variant,intron_variant
282	52610048	G	GATTTTATTT,GATTTTATTT	0/1	control	SYCP1		intron_variant,intron_variant
283	52610165	C	T,T	1/1	case	SYCP1		intron_variant,intron_variant
283	52610165	C	T,T	0/1	control	SYCP1		intron_variant,intron_variant
283	52610165	C	T,T	0/1	control	SYCP1		intron_variant,intron_variant
283	52610165	C	T,T	0/1	control	SYCP1		intron_variant,intron_variant
284	52611826	TG	T,T,T	1/1	case	SYCP1		upstream_gene_variant,intron_variant,intron_variant
284	52611826	TGG	T,TG,T,TG,T,TG	1/2	control	SYCP1		upstream_gene_variant,upstream_gene_variant,intron_variant,intron_variant,intron_variant,intron_variant
284	52611826	TGG	T,TG,T,TG,T,TG	1/2	control	SYCP1		upstream_gene_variant,upstream_gene_variant,intron_variant,intron_variant,intron_variant,intron_variant
284	52611826	TG	T,T,T	0/1	control	SYCP1		upstream_gene_variant,intron_variant,intron_variant
285	52612111	C	G,G,G	1/1	case	SYCP1		upstream_gene_variant,intron_variant,intron_variant
285	52612111	C	G,G,G	0/1	control	SYCP1		upstream_gene_variant,intron_variant,intron_variant
285	52612111	C	G,G,G	0/1	control	SYCP1		upstream_gene_variant,intron_variant,intron_variant
285	52612111	C	G,G,G	0/1	control	SYCP1		upstream_gene_variant,intron_variant,intron_variant
286	52612713	AAAT	A,A,A	1/1	case	SYCP1		upstream_gene_variant,intron_variant,intron_variant
286	52612713	AAAT	A,A,A	0/1	control	SYCP1		upstream_gene_variant,intron_variant,intron_variant
286	52612713	AAAT	A,A,A	0/1	control	SYCP1		upstream_gene_variant,intron_variant,intron_variant
286	52612713	AAAT	A,A,A	0/1	control	SYCP1		upstream_gene_variant,intron_variant,intron_variant
287	52613581	T	C,C,C	1/1	case	SYCP1		upstream_gene_variant,intron_variant,intron_variant
287	52613581	T	C,C,C	0/1	control	SYCP1		upstream_gene_variant,intron_variant,intron_variant
287	52613581	T	C,C,C	0/1	control	SYCP1		upstream_gene_variant,intron_variant,intron_variant
287	52613581	T	C,C,C	0/1	control	SYCP1		upstream_gene_variant,intron_variant,intron_variant
288	52614413	CAGGT	C,C,C	1/1	case	SYCP1		upstream_gene_variant,intron_variant,intron_variant
288	52614413	CAGGT	C,C,C	0/1	control	SYCP1		upstream_gene_variant,intron_variant,intron_variant
288	52614413	CAGGT	C,C,C	0/1	control	SYCP1		upstream_gene_variant,intron_variant,intron_variant
288	52614413	CAGGT	C,C,C	0/1	control	SYCP1		upstream_gene_variant,intron_variant,intron_variant
289	52614441	G	A,A,A	1/1	case	SYCP1		upstream_gene_variant,intron_variant,intron_variant
289	52614441	G	A,A,A	0/1	control	SYCP1		upstream_gene_variant,intron_variant,intron_variant
289	52614441	G	A,A,A	0/1	control	SYCP1		upstream_gene_variant,intron_variant,intron_variant
289	52614441	G	A,A,A	0/1	control	SYCP1		upstream_gene_variant,intron_variant,intron_variant
290	52615699	C	T,T,T	1/1	case	SYCP1		upstream_gene_variant,intron_variant,intron_variant
290	52615699	C	T,T,T	0/1	control	SYCP1		upstream_gene_variant,intron_variant,intron_variant
290	52615699	C	T,T,T	0/1	control	SYCP1		upstream_gene_variant,intron_variant,intron_variant
290	52615699	C	T,T,T	0/1	control	SYCP1		upstream_gene_variant,intron_variant,intron_variant
291	52616646	C	A,A,A	1/1	case	SYCP1		intron_variant,intron_variant,intron_variant
291	52616646	C	A,A,A	0/1	control	SYCP1		intron_variant,intron_variant,intron_variant
291	52616646	C	A,A,A	0/1	control	SYCP1		intron_variant,intron_variant,intron_variant
291	52616646	C	A,A,A	0/1	control	SYCP1		intron_variant,intron_variant,intron_variant
292	52616791	T	G,G,G	1/1	case	SYCP1		intron_variant,intron_variant,intron_variant
292	52616791	T	G,G,G	0/1	control	SYCP1		intron_variant,intron_variant,intron_variant
292	52616791	T	G,G,G	0/1	control	SYCP1		intron_variant,intron_variant,intron_variant
292	52616791	T	G,G,G	0/1	control	SYCP1		intron_variant,intron_variant,intron_variant
293	52617362	A	C,C,C	1/1	case	SYCP1		intron_variant,intron_variant,intron_variant
293	52617362	A	C,C,C	0/1	control	SYCP1		intron_variant,intron_variant,intron_variant
293	52617362	A	C,C,C	0/1	control	SYCP1		intron_variant,intron_variant,intron_variant
293	52617362	A	C,C,C	0/1	control	SYCP1		intron_variant,intron_variant,intron_variant
294	52622226	G	A,A,A	1/1	case	SYCP1		intron_variant,intron_variant,intron_variant
294	52622226	G	A,A,A	0/1	control	SYCP1		intron_variant,intron_variant,intron_variant
294	52622226	G	A,A,A	0/1	control	SYCP1		intron_variant,intron_variant,intron_variant
294	52622226	G	A,A,A	0/1	control	SYCP1		intron_variant,intron_variant,intron_variant
295	52622959	A	G,G,G,G	1/1	case	SYCP1		downstream_gene_variant,intron_variant,intron_variant,intron_variant
295	52622959	A	G,G,G,G	0/1	control	SYCP1		downstream_gene_variant,intron_variant,intron_variant,intron_variant
295	52622959	A	G,G,G,G	0/1	control	SYCP1		downstream_gene_variant,intron_variant,intron_variant,intron_variant
295	52622959	A	G,G,G,G	0/1	control	SYCP1		downstream_gene_variant,intron_variant,intron_variant,intron_variant
296	52623979	T	TA,TA,TA,TA	1/1	case	SYCP1		downstream_gene_variant,intron_variant,intron_variant,intron_variant
296	52623979	T	TA,TA,TA,TA	0/1	control	SYCP1		downstream_gene_variant,intron_variant,intron_variant,intron_variant
296	52623979	T	TA,TA,TA,TA	0/1	control	SYCP1		downstream_gene_variant,intron_variant,intron_variant,intron_variant
296	52623979	T	TA,TA,TA,TA	0/1	control	SYCP1		downstream_gene_variant,intron_variant,intron_variant,intron_variant
297	52625198	G	GAAACAAAC,GAAACAAAC,GAAACAAAC,GAAACAAAC	1/1	case	SYCP1		downstream_gene_variant,intron_variant,intron_variant,intron_variant
297	52625198	GAAAC	G,GAAACAAACAAAC,G,GAAACAAACAAAC,G,GAAACAAACAAAC,G,GAAACAAACAAAC	1/2	control	SYCP1		downstream_gene_variant,downstream_gene_variant,intron_variant,intron_variant,intron_variant,intron_variant,intron_variant,intron_variant
297	52625198	GAAAC	G,GAAACAAACAAAC,G,GAAACAAACAAAC,G,GAAACAAACAAAC,G,GAAACAAACAAAC	1/2	control	SYCP1		downstream_gene_variant,downstream_gene_variant,intron_variant,intron_variant,intron_variant,intron_variant,intron_variant,intron_variant
297	52625198	G	GAAAC,GAAACAAAC,GAAAC,GAAACAAAC,GAAAC,GAAACAAAC,GAAAC,GAAACAAAC	0/2	control	SYCP1		downstream_gene_variant,downstream_gene_variant,intron_variant,intron_variant,intron_variant,intron_variant,intron_variant,intron_variant
298	52627762	T	G,G,G,G	1/1	case	SYCP1		downstream_gene_variant,intron_variant,intron_variant,intron_variant
298	52627762	T	G,G,G,G	0/1	control	SYCP1		downstream_gene_variant,intron_variant,intron_variant,intron_variant
298	52627762	T	G,G,G,G	0/1	control	SYCP1		downstream_gene_variant,intron_variant,intron_variant,intron_variant
298	52627762	T	G,G,G,G	0/1	control	SYCP1		downstream_gene_variant,intron_variant,intron_variant,intron_variant
299	52627796	A	G,G,G,G	1/1	case	SYCP1		downstream_gene_variant,intron_variant,intron_variant,intron_variant
299	52627796	A	G,G,G,G	0/1	control	SYCP1		downstream_gene_variant,intron_variant,intron_variant,intron_variant
299	52627796	A	G,G,G,G	0/1	control	SYCP1		downstream_gene_variant,intron_variant,intron_variant,intron_variant
299	52627796	A	G,G,G,G	0/1	control	SYCP1		downstream_gene_variant,intron_variant,intron_variant,intron_variant
300	52628518	C	G,G,G,G	1/1	case	SYCP1		missense_variant,intron_variant,intron_variant,intron_variant
300	52628518	C	G,G,G,G	0/1	control	SYCP1		missense_variant,intron_variant,intron_variant,intron_variant
300	52628518	C	G,G,G,G	0/1	control	SYCP1		missense_variant,intron_variant,intron_variant,intron_variant
300	52628518	C	G,G,G,G	0/1	control	SYCP1		missense_variant,intron_variant,intron_variant,intron_variant
301	52629160	CAGAGAGAGAG	C,C,C,C	1/1	case	SYCP1		upstream_gene_variant,intron_variant,intron_variant,intron_variant
301	52629160	CAGAGAGAGAGAG	C,CAGAGAGAGAGAGAG,C,CAGAGAGAGAGAGAG,C,CAGAGAGAGAGAGAG,C,CAGAGAGAGAGAGAG	1/2	control	SYCP1		upstream_gene_variant,upstream_gene_variant,intron_variant,intron_variant,intron_variant,intron_variant,intron_variant,intron_variant
301	52629160	CAGAGAGAGAG	C,CAGAGAGAGAGAG,C,CAGAGAGAGAGAG,C,CAGAGAGAGAGAG,C,CAGAGAGAGAGAG	1/2	control	SYCP1		upstream_gene_variant,upstream_gene_variant,intron_variant,intron_variant,intron_variant,intron_variant,intron_variant,intron_variant
301	52629160	CAGAGAGAGAG	C,CAG,C,CAG,C,CAG,C,CAG	1/2	control	SYCP1		upstream_gene_variant,upstream_gene_variant,intron_variant,intron_variant,intron_variant,intron_variant,intron_variant,intron_variant
302	52629308	G	A,A,A,A	1/1	case	SYCP1		upstream_gene_variant,intron_variant,intron_variant,intron_variant
302	52629308	G	A,A,A,A	0/1	control	SYCP1		upstream_gene_variant,intron_variant,intron_variant,intron_variant
302	52629308	G	A,A,A,A	0/1	control	SYCP1		upstream_gene_variant,intron_variant,intron_variant,intron_variant
302	52629308	G	A,A,A,A	0/1	control	SYCP1		upstream_gene_variant,intron_variant,intron_variant,intron_variant
303	52630075	C	T,T,T,T	1/1	case	SYCP1		upstream_gene_variant,intron_variant,intron_variant,intron_variant
303	52630075	C	T,T,T,T	0/1	control	SYCP1		upstream_gene_variant,intron_variant,intron_variant,intron_variant
303	52630075	C	T,T,T,T	0/1	control	SYCP1		upstream_gene_variant,intron_variant,intron_variant,intron_variant
303	52630075	C	T,T,T,T	0/1	control	SYCP1		upstream_gene_variant,intron_variant,intron_variant,intron_variant
304	52630153	CTTAA	C,C,C,C	1/1	case	SYCP1		upstream_gene_variant,intron_variant,intron_variant,intron_variant
304	52630153	CTTAA	C,C,C,C	0/1	control	SYCP1		upstream_gene_variant,intron_variant,intron_variant,intron_variant
304	52630153	CTTAA	C,C,C,C	0/1	control	SYCP1		upstream_gene_variant,intron_variant,intron_variant,intron_variant
304	52630153	CTTAA	C,C,C,C	0/1	control	SYCP1		upstream_gene_variant,intron_variant,intron_variant,intron_variant
305	52631906	C	G,G,G,G	1/1	case	SYCP1		upstream_gene_variant,intron_variant,intron_variant,intron_variant
305	52631906	C	G,G,G,G	0/1	control	SYCP1		upstream_gene_variant,intron_variant,intron_variant,intron_variant
305	52631906	C	G,G,G,G	0/1	control	SYCP1		upstream_gene_variant,intron_variant,intron_variant,intron_variant
305	52631906	C	G,G,G,G	0/1	control	SYCP1		upstream_gene_variant,intron_variant,intron_variant,intron_variant
306	52632940	T	TTC,TTC,TTC,TTC	1/1	case	SYCP1		upstream_gene_variant,intron_variant,intron_variant,intron_variant
306	52632940	T	TTC,TTC,TTC,TTC	0/1	control	SYCP1		upstream_gene_variant,intron_variant,intron_variant,intron_variant
306	52632940	T	TTC,TTC,TTC,TTC	0/1	control	SYCP1		upstream_gene_variant,intron_variant,intron_variant,intron_variant
306	52632940	T	TTC,TTC,TTC,TTC	0/1	control	SYCP1		upstream_gene_variant,intron_variant,intron_variant,intron_variant
307	52634086	A	T,T,T,T	1/1	case	SYCP1		upstream_gene_variant,intron_variant,intron_variant,intron_variant
307	52634086	A	T,T,T,T	0/1	control	SYCP1		upstream_gene_variant,intron_variant,intron_variant,intron_variant
307	52634086	A	T,T,T,T	0/1	control	SYCP1		upstream_gene_variant,intron_variant,intron_variant,intron_variant
307	52634086	ATT	TTT,A,TTT,A,TTT,A,TTT,A	1/2	control	SYCP1		upstream_gene_variant,upstream_gene_variant,intron_variant,intron_variant,intron_variant,intron_variant,intron_variant,intron_variant
308	52634088	T	A,A,A,A	1/1	case	SYCP1		upstream_gene_variant,intron_variant,intron_variant,intron_variant
308	52634088	T	A,A,A,A	0/1	control	SYCP1		upstream_gene_variant,intron_variant,intron_variant,intron_variant
308	52634088	T	A,A,A,A	0/1	control	SYCP1		upstream_gene_variant,intron_variant,intron_variant,intron_variant
308	52634088	T	A,A,A,A	0/1	control	SYCP1		upstream_gene_variant,intron_variant,intron_variant,intron_variant
309	52634095	ATT	A,A,A,A	1/1	case	SYCP1		upstream_gene_variant,intron_variant,intron_variant,intron_variant
309	52634095	ATT	A,A,A,A	0/1	control	SYCP1		upstream_gene_variant,intron_variant,intron_variant,intron_variant
309	52634095	ATT	A,A,A,A	0/1	control	SYCP1		upstream_gene_variant,intron_variant,intron_variant,intron_variant
309	52634095	ATT	A,A,A,A	0/1	control	SYCP1		upstream_gene_variant,intron_variant,intron_variant,intron_variant
310	52634106	TA	T,T,T,T	1/1	case	SYCP1		upstream_gene_variant,intron_variant,intron_variant,intron_variant
310	52634106	TA	T,T,T,T	0/1	control	SYCP1		upstream_gene_variant,intron_variant,intron_variant,intron_variant
310	52634106	TA	T,T,T,T	0/1	control	SYCP1		upstream_gene_variant,intron_variant,intron_variant,intron_variant
310	52634106	TA	T,T,T,T	0/1	control	SYCP1		upstream_gene_variant,intron_variant,intron_variant,intron_variant
312	52634141	A	G,G,G,G	1/1	case	SYCP1		upstream_gene_variant,intron_variant,intron_variant,intron_variant
311	52634141	A	G,G,G,G	0/1	control	SYCP1		upstream_gene_variant,intron_variant,intron_variant,intron_variant
311	52634141	A	G,G,G,G	0/1	control	SYCP1		upstream_gene_variant,intron_variant,intron_variant,intron_variant
311	52634141	A	G,G,G,G	0/1	control	SYCP1		upstream_gene_variant,intron_variant,intron_variant,intron_variant
311	52634163	C	T,T,T,T	1/1	case	SYCP1		upstream_gene_variant,intron_variant,intron_variant,intron_variant
311	52634163	C	T,T,T,T	0/1	control	SYCP1		upstream_gene_variant,intron_variant,intron_variant,intron_variant
311	52634163	C	T,T,T,T	0/1	control	SYCP1		upstream_gene_variant,intron_variant,intron_variant,intron_variant
312	52634631	T	C,C,C,C	1/1	case	SYCP1		upstream_gene_variant,intron_variant,intron_variant,intron_variant
312	52634631	T	C,C,C,C	0/1	control	SYCP1		upstream_gene_variant,intron_variant,intron_variant,intron_variant
312	52634631	T	C,C,C,C	0/1	control	SYCP1		upstream_gene_variant,intron_variant,intron_variant,intron_variant
312	52634631	T	C,C,C,C	0/1	control	SYCP1		upstream_gene_variant,intron_variant,intron_variant,intron_variant
313	52635128	C	T,T,T,T	1/1	case	SYCP1		upstream_gene_variant,intron_variant,intron_variant,intron_variant
313	52635128	C	T,T,T,T	0/1	control	SYCP1		upstream_gene_variant,intron_variant,intron_variant,intron_variant
313	52635128	C	T,T,T,T	0/1	control	SYCP1		upstream_gene_variant,intron_variant,intron_variant,intron_variant
313	52635128	C	T,T,T,T	0/1	control	SYCP1		upstream_gene_variant,intron_variant,intron_variant,intron_variant
314	52635132	G	A,A,A,A	1/1	case	SYCP1		upstream_gene_variant,intron_variant,intron_variant,intron_variant
314	52635132	G	A,A,A,A	0/1	control	SYCP1		upstream_gene_variant,intron_variant,intron_variant,intron_variant
314	52635132	G	A,A,A,A	0/1	control	SYCP1		upstream_gene_variant,intron_variant,intron_variant,intron_variant
314	52635132	G	A,A,A,A	0/1	control	SYCP1		upstream_gene_variant,intron_variant,intron_variant,intron_variant
315	52635293	TC	T,T,T,T	1/1	case	SYCP1		upstream_gene_variant,intron_variant,intron_variant,intron_variant
315	52635293	TC	T,T,T,T	0/1	control	SYCP1		upstream_gene_variant,intron_variant,intron_variant,intron_variant
315	52635293	TC	T,T,T,T	0/1	control	SYCP1		upstream_gene_variant,intron_variant,intron_variant,intron_variant
315	52635293	TC	T,T,T,T	0/1	control	SYCP1		upstream_gene_variant,intron_variant,intron_variant,intron_variant
316	52636036	G	A,A,A,A	1/1	case	SYCP1		upstream_gene_variant,intron_variant,intron_variant,intron_variant
316	52636036	G	A,A,A,A	0/1	control	SYCP1		upstream_gene_variant,intron_variant,intron_variant,intron_variant
316	52636036	G	A,A,A,A	0/1	control	SYCP1		upstream_gene_variant,intron_variant,intron_variant,intron_variant
316	52636036	G	A,A,A,A	0/1	control	SYCP1		upstream_gene_variant,intron_variant,intron_variant,intron_variant
317	52636395	T	A,A,A,A	1/1	case	SYCP1		upstream_gene_variant,intron_variant,intron_variant,intron_variant
317	52636395	T	A,A,A,A	0/1	control	SYCP1		upstream_gene_variant,intron_variant,intron_variant,intron_variant
317	52636395	T	A,A,A,A	0/1	control	SYCP1		upstream_gene_variant,intron_variant,intron_variant,intron_variant
318	52636406	T	A,A,A,A	1/1	case	SYCP1		upstream_gene_variant,intron_variant,intron_variant,intron_variant
318	52636406	T	A,A,A,A	0/1	control	SYCP1		upstream_gene_variant,intron_variant,intron_variant,intron_variant
318	52636406	T	A,A,A,A	0/1	control	SYCP1		upstream_gene_variant,intron_variant,intron_variant,intron_variant
319	52636450	CAT	C,C,C,C	1/1	case	SYCP1		upstream_gene_variant,intron_variant,intron_variant,intron_variant
319	52636450	CAT	C,C,C,C	0/1	control	SYCP1		upstream_gene_variant,intron_variant,intron_variant,intron_variant
319	52636450	CAT	C,C,C,C	0/1	control	SYCP1		upstream_gene_variant,intron_variant,intron_variant,intron_variant
320	52636928	A	AT,AT,AT,AT	1/1	case	SYCP1		upstream_gene_variant,intron_variant,intron_variant,intron_variant
320	52636928	A	AT,AT,AT,AT	0/1	control	SYCP1		upstream_gene_variant,intron_variant,intron_variant,intron_variant
320	52636928	A	AT,AT,AT,AT	0/1	control	SYCP1		upstream_gene_variant,intron_variant,intron_variant,intron_variant
320	52636928	AT	A,ATT,A,ATT,A,ATT,A,ATT	1/2	control	SYCP1		upstream_gene_variant,upstream_gene_variant,intron_variant,intron_variant,intron_variant,intron_variant,intron_variant,intron_variant
321	52637505	C	T,T,T,T	1/1	case	SYCP1		upstream_gene_variant,intron_variant,intron_variant,intron_variant
321	52637505	C	T,T,T,T	0/1	control	SYCP1		upstream_gene_variant,intron_variant,intron_variant,intron_variant
321	52637505	C	T,T,T,T	0/1	control	SYCP1		upstream_gene_variant,intron_variant,intron_variant,intron_variant
321	52637505	C	T,T,T,T	0/1	control	SYCP1		upstream_gene_variant,intron_variant,intron_variant,intron_variant
322	52637754	A	T,T,T,T	1/1	case	SYCP1		upstream_gene_variant,intron_variant,intron_variant,intron_variant
322	52637754	A	T,T,T,T	0/1	control	SYCP1		upstream_gene_variant,intron_variant,intron_variant,intron_variant
322	52637754	A	T,T,T,T	0/1	control	SYCP1		upstream_gene_variant,intron_variant,intron_variant,intron_variant
322	52637754	A	T,T,T,T	0/1	control	SYCP1		upstream_gene_variant,intron_variant,intron_variant,intron_variant
323	52643756	A	G,G,G,G	1/1	case	SYCP1		intron_variant,intron_variant,intron_variant,intron_variant
323	52643756	A	G,G,G,G	0/1	control	SYCP1		intron_variant,intron_variant,intron_variant,intron_variant
323	52643756	A	G,G,G,G	0/1	control	SYCP1		intron_variant,intron_variant,intron_variant,intron_variant
323	52643756	A	G,G,G,G	0/1	control	SYCP1		intron_variant,intron_variant,intron_variant,intron_variant
324	52644626	C	T,T,T,T	1/1	case	SYCP1		intron_variant,intron_variant,intron_variant,intron_variant
324	52644626	C	T,T,T,T	0/1	control	SYCP1		intron_variant,intron_variant,intron_variant,intron_variant
324	52644626	C	T,T,T,T	0/1	control	SYCP1		intron_variant,intron_variant,intron_variant,intron_variant
324	52644626	C	T,T,T,T	0/1	control	SYCP1		intron_variant,intron_variant,intron_variant,intron_variant
325	52645214	A	C,C,C,C	1/1	case	SYCP1		intron_variant,intron_variant,intron_variant,intron_variant
325	52645214	A	C,C,C,C	0/1	control	SYCP1		intron_variant,intron_variant,intron_variant,intron_variant
325	52645214	A	C,C,C,C	0/1	control	SYCP1		intron_variant,intron_variant,intron_variant,intron_variant
325	52645214	A	C,C,C,C	0/1	control	SYCP1		intron_variant,intron_variant,intron_variant,intron_variant
326	52645226	T	G,G,G,G	1/1	case	SYCP1		intron_variant,intron_variant,intron_variant,intron_variant
326	52645226	T	G,G,G,G	0/1	control	SYCP1		intron_variant,intron_variant,intron_variant,intron_variant
326	52645226	T	G,G,G,G	0/1	control	SYCP1		intron_variant,intron_variant,intron_variant,intron_variant
326	52645226	T	G,G,G,G	0/1	control	SYCP1		intron_variant,intron_variant,intron_variant,intron_variant
327	52645227	G	T,T,T,T	1/1	case	SYCP1		intron_variant,intron_variant,intron_variant,intron_variant
327	52645227	G	T,T,T,T	0/1	control	SYCP1		intron_variant,intron_variant,intron_variant,intron_variant
327	52645227	G	T,T,T,T	0/1	control	SYCP1		intron_variant,intron_variant,intron_variant,intron_variant
327	52645227	G	T,T,T,T	0/1	control	SYCP1		intron_variant,intron_variant,intron_variant,intron_variant
328	52646581	G	A,A,A,A	1/1	case	SYCP1		intron_variant,intron_variant,intron_variant,intron_variant
328	52646581	G	A,A,A,A	0/1	control	SYCP1		intron_variant,intron_variant,intron_variant,intron_variant
328	52646581	G	A,A,A,A	0/1	control	SYCP1		intron_variant,intron_variant,intron_variant,intron_variant
328	52646581	G	A,A,A,A	0/1	control	SYCP1		intron_variant,intron_variant,intron_variant,intron_variant
329	52646733	GTA	G,G,G,G	1/1	case	SYCP1		intron_variant,intron_variant,intron_variant,intron_variant
329	52646733	GTA	G,G,G,G	0/1	control	SYCP1		intron_variant,intron_variant,intron_variant,intron_variant
329	52646733	GTA	G,G,G,G	0/1	control	SYCP1		intron_variant,intron_variant,intron_variant,intron_variant
329	52646733	GTA	G,G,G,G	0/1	control	SYCP1		intron_variant,intron_variant,intron_variant,intron_variant
330	52647469	A	G,G,G,G	1/1	case	SYCP1		intron_variant,intron_variant,intron_variant,intron_variant
330	52647469	A	G,G,G,G	0/1	control	SYCP1		intron_variant,intron_variant,intron_variant,intron_variant
330	52647469	A	G,G,G,G	0/1	control	SYCP1		intron_variant,intron_variant,intron_variant,intron_variant
330	52647469	A	G,G,G,G	0/1	control	SYCP1		intron_variant,intron_variant,intron_variant,intron_variant
331	52648247	A	G,G,G,G	1/1	case	SYCP1		3_prime_UTR_variant,downstream_gene_variant,downstream_gene_variant,intron_variant
331	52648247	A	G,G,G,G	0/1	control	SYCP1		3_prime_UTR_variant,downstream_gene_variant,downstream_gene_variant,intron_variant
331	52648247	A	G,G,G,G	0/1	control	SYCP1		3_prime_UTR_variant,downstream_gene_variant,downstream_gene_variant,intron_variant
331	52648247	A	G,G,G,G	0/1	control	SYCP1		3_prime_UTR_variant,downstream_gene_variant,downstream_gene_variant,intron_variant
332	52648576	C	T,T,T,T	1/1	case			downstream_gene_variant,downstream_gene_variant,downstream_gene_variant,intron_variant
332	52648576	C	T,T,T,T	0/1	control			downstream_gene_variant,downstream_gene_variant,downstream_gene_variant,intron_variant
332	52648576	C	T,T,T,T	0/1	control			downstream_gene_variant,downstream_gene_variant,downstream_gene_variant,intron_variant
332	52648576	C	T,T,T,T	0/1	control			downstream_gene_variant,downstream_gene_variant,downstream_gene_variant,intron_variant
333	52648644	T	A,A,A,A	1/1	case			downstream_gene_variant,downstream_gene_variant,downstream_gene_variant,intron_variant
333	52648644	T	A,A,A,A	0/1	control			downstream_gene_variant,downstream_gene_variant,downstream_gene_variant,intron_variant
333	52648644	T	A,A,A,A	0/1	control			downstream_gene_variant,downstream_gene_variant,downstream_gene_variant,intron_variant
333	52648644	T	A,A,A,A	0/1	control			downstream_gene_variant,downstream_gene_variant,downstream_gene_variant,intron_variant
334	52651668	T	A,A,A,A	1/1	case			downstream_gene_variant,downstream_gene_variant,downstream_gene_variant,intron_variant
334	52651668	T	A,A,A,A	0/1	control			downstream_gene_variant,downstream_gene_variant,downstream_gene_variant,intron_variant
334	52651668	T	A,A,A,A	0/1	control			downstream_gene_variant,downstream_gene_variant,downstream_gene_variant,intron_variant
334	52651668	T	A,A,A,A	0/1	control			downstream_gene_variant,downstream_gene_variant,downstream_gene_variant,intron_variant
335	52651875	T	G,G,G,G	1/1	case			downstream_gene_variant,downstream_gene_variant,downstream_gene_variant,intron_variant
335	52651875	T	G,G,G,G	0/1	control			downstream_gene_variant,downstream_gene_variant,downstream_gene_variant,intron_variant
335	52651875	T	G,G,G,G	0/1	control			downstream_gene_variant,downstream_gene_variant,downstream_gene_variant,intron_variant
335	52651875	T	G,G,G,G	0/1	control			downstream_gene_variant,downstream_gene_variant,downstream_gene_variant,intron_variant
336	52654500	T	A	1/1	case	TSHB		intron_variant
336	52654500	T	A	0/1	control	TSHB		intron_variant
336	52654500	T	A	0/1	control	TSHB		intron_variant
336	52654500	T	A	0/1	control	TSHB		intron_variant
337	52654807	C	T	1/1	case	TSHB		intron_variant
337	52654807	C	T	0/1	control	TSHB		intron_variant
337	52654807	C	T	0/1	control	TSHB		intron_variant
337	52654807	C	T	0/1	control	TSHB		intron_variant
338	52657569	G	A	1/1	case	TSHB		intron_variant
338	52657569	G	A	0/1	control	TSHB		intron_variant
338	52657569	G	A	0/1	control	TSHB		intron_variant
338	52657569	G	A	0/1	control	TSHB		intron_variant
339	52658565	T	A	1/1	case	TSHB		intron_variant
339	52658565	T	A	0/1	control	TSHB		intron_variant
339	52658565	T	A	0/1	control	TSHB		intron_variant
339	52658565	T	A	0/1	control	TSHB		intron_variant
340	52660312	C	A	1/1	case	TSHB		intron_variant
340	52660312	C	A	0/1	control	TSHB		intron_variant
340	52660312	C	A	0/1	control	TSHB		intron_variant
340	52660312	C	A	0/1	control	TSHB		intron_variant
341	52661112	G	C	1/1	case	TSHB		intron_variant
341	52661112	G	C	0/1	control	TSHB		intron_variant
341	52661112	G	C	0/1	control	TSHB		intron_variant
341	52661112	G	C	0/1	control	TSHB		intron_variant
342	52661590	C	T	1/1	case	TSHB		intron_variant
342	52661590	C	T	0/1	control	TSHB		intron_variant
342	52661590	C	T	0/1	control	TSHB		intron_variant
342	52661590	C	T	0/1	control	TSHB		intron_variant
343	52661665	A	G	1/1	case	TSHB		intron_variant
343	52661665	A	G	0/1	control	TSHB		intron_variant
343	52661665	A	G	0/1	control	TSHB		intron_variant
343	52661665	A	G	0/1	control	TSHB		intron_variant
344	52661978	T	C	1/1	case	TSHB		intron_variant
344	52661978	T	C	0/1	control	TSHB		intron_variant
344	52661978	T	C	0/1	control	TSHB		intron_variant
344	52661978	T	C	0/1	control	TSHB		intron_variant
345	52662612	A	T	1/1	case	TSHB		intron_variant
345	52662612	A	T	0/1	control	TSHB		intron_variant
345	52662612	A	T	0/1	control	TSHB		intron_variant
345	52662612	A	T	0/1	control	TSHB		intron_variant
346	52663754	G	A	1/1	case	TSHB		intron_variant
346	52663754	G	A	0/1	control	TSHB		intron_variant
346	52663754	G	A	0/1	control	TSHB		intron_variant
346	52663754	G	A	0/1	control	TSHB		intron_variant
347	52663758	GATTT	G	1/1	case	TSHB		intron_variant
347	52663758	GATTT	G	0/1	control	TSHB		intron_variant
347	52663758	GATTT	G	0/1	control	TSHB		intron_variant
347	52663758	GATTT	G	0/1	control	TSHB		intron_variant
348	52664106	C	A	1/1	case	TSHB		intron_variant
348	52664106	C	A	0/1	control	TSHB		intron_variant
348	52664106	C	A	0/1	control	TSHB		intron_variant
348	52664106	C	A	0/1	control	TSHB		intron_variant
349	52665209	G	C	1/1	case	TSHB		intron_variant
349	52665209	G	C	0/1	control	TSHB		intron_variant
349	52665209	G	C	0/1	control	TSHB		intron_variant
349	52665209	G	C	0/1	control	TSHB		intron_variant
350	52665360	T	A	1/1	case	TSHB		intron_variant
350	52665360	T	A	0/1	control	TSHB		intron_variant
350	52665360	T	A	0/1	control	TSHB		intron_variant
350	52665360	T	A	0/1	control	TSHB		intron_variant
351	52665696	T	A	1/1	case	TSHB		intron_variant
351	52665696	T	A	0/1	control	TSHB		intron_variant
351	52665696	T	A	0/1	control	TSHB		intron_variant
351	52665696	T	A	0/1	control	TSHB		intron_variant
352	52666365	AT	A	1/1	case	TSHB		intron_variant
352	52666365	AT	A	0/1	control	TSHB		intron_variant
352	52666365	AT	A	0/1	control	TSHB		intron_variant
352	52666365	AT	A	0/1	control	TSHB		intron_variant
353	52667162	C	T	1/1	case	TSHB		intron_variant
353	52667162	C	T	0/1	control	TSHB		intron_variant
353	52667162	C	T	0/1	control	TSHB		intron_variant
353	52667162	C	T	0/1	control	TSHB		intron_variant
354	52669065	G	C	1/1	case	TSHB		intron_variant
354	52669065	G	C	0/1	control	TSHB		intron_variant
354	52669065	G	C	0/1	control	TSHB		intron_variant
354	52669065	G	C	0/1	control	TSHB		intron_variant
355	52670554	G	A	1/1	case	TSHB		intron_variant
355	52670554	G	A	0/1	control	TSHB		intron_variant
355	52670554	G	A	0/1	control	TSHB		intron_variant
355	52670554	G	A	0/1	control	TSHB		intron_variant
356	52670860	T	C	1/1	case	TSHB		intron_variant
356	52670860	T	C	0/1	control	TSHB		intron_variant
356	52670860	T	C	0/1	control	TSHB		intron_variant
356	52670860	T	C	0/1	control	TSHB		intron_variant
357	52671966	C	T	1/1	case	TSHB		intron_variant
357	52671966	C	T	0/1	control	TSHB		intron_variant
357	52671966	C	T	0/1	control	TSHB		intron_variant
357	52671966	C	T	0/1	control	TSHB		intron_variant
358	52672027	G	A	1/1	case	TSHB		intron_variant
358	52672027	G	A	0/1	control	TSHB		intron_variant
358	52672027	G	A	0/1	control	TSHB		intron_variant
358	52672027	G	A	0/1	control	TSHB		intron_variant
359	52672746	C	A	1/1	case	TSHB		intron_variant
359	52672746	C	A	0/1	control	TSHB		intron_variant
359	52672746	C	A	0/1	control	TSHB		intron_variant
359	52672746	C	A	0/1	control	TSHB		intron_variant
360	52673994	G	A	1/1	case	TSHB		intron_variant
360	52673994	G	A	0/1	control	TSHB		intron_variant
360	52673994	G	A	0/1	control	TSHB		intron_variant
360	52673994	G	A	0/1	control	TSHB		intron_variant
361	52675323	A	G	1/1	case	TSHB		intron_variant
361	52675323	A	G	0/1	control	TSHB		intron_variant
361	52675323	A	G	0/1	control	TSHB		intron_variant
361	52675323	A	G	0/1	control	TSHB		intron_variant
362	52675811	A	T	1/1	case	TSHB		intron_variant
362	52675811	A	T	0/1	control	TSHB		intron_variant
362	52675811	A	T	0/1	control	TSHB		intron_variant
362	52675811	A	T	0/1	control	TSHB		intron_variant
363	52676546	G	A	1/1	case	TSHB		intron_variant
363	52676546	G	A	0/1	control	TSHB		intron_variant
363	52676546	G	A	0/1	control	TSHB		intron_variant
363	52676546	G	A	0/1	control	TSHB		intron_variant
364	52677004	C	T	1/1	case	TSHB		intron_variant
364	52677004	C	T	0/1	control	TSHB		intron_variant
364	52677004	C	T	0/1	control	TSHB		intron_variant
364	52677004	C	T	0/1	control	TSHB		intron_variant
365	52677697	T	C	1/1	case	TSHB		intron_variant
365	52677697	T	C	0/1	control	TSHB		intron_variant
365	52677697	T	C	0/1	control	TSHB		intron_variant
365	52677697	T	C	0/1	control	TSHB		intron_variant
366	52679663	ATTT	A	1/1	case	TSHB		intron_variant
366	52679663	ATTT	A,AT	1/2	control	TSHB		intron_variant,intron_variant
366	52679663	ATTT	A,AT	1/2	control	TSHB		intron_variant,intron_variant
366	52679663	ATTT	A	0/1	control	TSHB		intron_variant
367	52683663	TAGAC	T	1/1	case	TSHB		intron_variant
367	52683663	TAGAC	T	0/1	control	TSHB		intron_variant
367	52683663	TAGAC	T	0/1	control	TSHB		intron_variant
367	52683663	TAGAC	T	0/1	control	TSHB		intron_variant
368	52683707	C	T	1/1	case	TSHB		intron_variant
368	52683707	C	T	0/1	control	TSHB		intron_variant
368	52683707	C	T	0/1	control	TSHB		intron_variant
368	52683707	C	T	0/1	control	TSHB		intron_variant
369	52683938	A	ATT	1/1	case	TSHB		intron_variant
369	52683938	A	ATT	0/1	control	TSHB		intron_variant
369	52683938	A	ATT	0/1	control	TSHB		intron_variant
369	52683938	A	ATT	0/1	control	TSHB		intron_variant
370	52683941	A	C	1/1	case	TSHB		intron_variant
370	52683941	A	C	0/1	control	TSHB		intron_variant
370	52683941	A	C	0/1	control	TSHB		intron_variant
370	52683941	A	C	0/1	control	TSHB		intron_variant
371	52683945	C	T	1/1	case	TSHB		intron_variant
371	52683945	C	T	0/1	control	TSHB		intron_variant
371	52683945	C	T	0/1	control	TSHB		intron_variant
371	52683945	C	T	0/1	control	TSHB		intron_variant
372	52684155	C	T	1/1	case	TSHB		intron_variant
372	52684155	C	T	0/1	control	TSHB		intron_variant
372	52684155	C	T	0/1	control	TSHB		intron_variant
372	52684155	C	T	0/1	control	TSHB		intron_variant
373	52684994	G	GTATCA	1/1	case	TSHB		intron_variant
373	52684994	G	GTATCA	0/1	control	TSHB		intron_variant
373	52684994	G	GTATCA	0/1	control	TSHB		intron_variant
373	52684994	G	GTATCA	0/1	control	TSHB		intron_variant
374	52686138	C	T,T	1/1	case			downstream_gene_variant,intergenic_region
374	52686138	C	T,T	0/1	control			downstream_gene_variant,intergenic_region
374	52686138	C	T,T	0/1	control			downstream_gene_variant,intergenic_region
374	52686138	C	T,T	0/1	control			downstream_gene_variant,intergenic_region
375	52686852	C	T,T	1/1	case			downstream_gene_variant,intergenic_region
375	52686852	C	T,T	0/1	control			downstream_gene_variant,intergenic_region
375	52686852	C	T,T	0/1	control			downstream_gene_variant,intergenic_region
375	52686852	C	T,T	0/1	control			downstream_gene_variant,intergenic_region
376	52694842	T	G,G	1/1	case			downstream_gene_variant,intergenic_region
376	52694842	T	G,G	0/1	control			downstream_gene_variant,intergenic_region
376	52694842	T	G,G	0/1	control			downstream_gene_variant,intergenic_region
376	52694842	T	G,G	0/1	control			downstream_gene_variant,intergenic_region
377	52698334	G	A	1/1	case	TSPAN2		intron_variant
377	52698334	G	A	0/1	control	TSPAN2		intron_variant
377	52698334	G	A	0/1	control	TSPAN2		intron_variant
377	52698334	G	A	0/1	control	TSPAN2		intron_variant
378	52700177	C	CTCACT,CACTTAGCTCACTCACT	2/2	case	TSPAN2		intron_variant,intron_variant
378	52700177	C	CTCACT,CACTTAGCTCACTCACT	0/2	control	TSPAN2		intron_variant,intron_variant
378	52700177	C	CTCACT,CACTTAGCTCACTCACT	0/2	control	TSPAN2		intron_variant,intron_variant
378	52700177	C	CTCACT,CACTTAGCTCACTCACT	0/2	control	TSPAN2		intron_variant,intron_variant
379	52700400	C	T	1/1	case	TSPAN2		intron_variant
379	52700400	C	T	0/1	control	TSPAN2		intron_variant
379	52700400	C	T	0/1	control	TSPAN2		intron_variant
379	52700400	C	T	0/1	control	TSPAN2		intron_variant
380	52700674	C	A	1/1	case	TSPAN2		intron_variant
380	52700674	C	A	0/1	control	TSPAN2		intron_variant
380	52700674	C	A	0/1	control	TSPAN2		intron_variant
380	52700674	C	A	0/1	control	TSPAN2		intron_variant
381	52703842	T	C	1/1	case	TSPAN2		intron_variant
381	52703842	T	C	0/1	control	TSPAN2		intron_variant
381	52703842	T	C	0/1	control	TSPAN2		intron_variant
381	52703842	T	C	0/1	control	TSPAN2		intron_variant
382	52703914	C	CT	1/1	case	TSPAN2		intron_variant
382	52703914	C	CT	0/1	control	TSPAN2		intron_variant
382	52703914	C	CT	0/1	control	TSPAN2		intron_variant
382	52703914	C	CT	0/1	control	TSPAN2		intron_variant
383	52704952	C	T	1/1	case	TSPAN2		intron_variant
383	52704952	C	T	0/1	control	TSPAN2		intron_variant
383	52704952	C	T	0/1	control	TSPAN2		intron_variant
383	52704952	C	T	0/1	control	TSPAN2		intron_variant
384	52705062	G	T	1/1	case	TSPAN2		intron_variant
384	52705062	G	T	0/1	control	TSPAN2		intron_variant
384	52705062	G	T	0/1	control	TSPAN2		intron_variant
384	52705062	G	T	0/1	control	TSPAN2		intron_variant
385	52705152	C	T	1/1	case	TSPAN2		intron_variant
385	52705152	C	T	0/1	control	TSPAN2		intron_variant
385	52705152	C	T	0/1	control	TSPAN2		intron_variant
385	52705152	C	T	0/1	control	TSPAN2		intron_variant
386	52705361	C	T	1/1	case	TSPAN2		intron_variant
386	52705361	C	T	0/1	control	TSPAN2		intron_variant
386	52705361	C	T	0/1	control	TSPAN2		intron_variant
386	52705361	C	T	0/1	control	TSPAN2		intron_variant
387	52705420	TA	T	1/1	case	TSPAN2		intron_variant
387	52705420	TA	T	0/1	control	TSPAN2		intron_variant
387	52705420	TA	T	0/1	control	TSPAN2		intron_variant
387	52705420	TA	T	0/1	control	TSPAN2		intron_variant
388	52705467	C	T	1/1	case	TSPAN2		intron_variant
388	52705467	C	T	0/1	control	TSPAN2		intron_variant
388	52705467	C	T	0/1	control	TSPAN2		intron_variant
388	52705467	C	T	0/1	control	TSPAN2		intron_variant
389	52705637	A	C	1/1	case	TSPAN2		intron_variant
389	52705637	A	C	0/1	control	TSPAN2		intron_variant
389	52705637	A	C	0/1	control	TSPAN2		intron_variant
389	52705637	A	C	0/1	control	TSPAN2		intron_variant
390	52706756	T	C	1/1	case	TSPAN2		intron_variant
390	52706756	T	C	0/1	control	TSPAN2		intron_variant
390	52706756	T	C	0/1	control	TSPAN2		intron_variant
390	52706756	T	C	0/1	control	TSPAN2		intron_variant
391	52706785	C	T	1/1	case	TSPAN2		intron_variant
391	52706785	C	T	0/1	control	TSPAN2		intron_variant
391	52706785	C	T	0/1	control	TSPAN2		intron_variant
391	52706785	C	T	0/1	control	TSPAN2		intron_variant
392	52706808	G	A	1/1	case	TSPAN2		intron_variant
392	52706808	G	A	0/1	control	TSPAN2		intron_variant
392	52706808	G	A	0/1	control	TSPAN2		intron_variant
392	52706808	G	A	0/1	control	TSPAN2		intron_variant
393	52706939	G	A	1/1	case	TSPAN2		intron_variant
393	52706939	G	A	0/1	control	TSPAN2		intron_variant
393	52706939	G	A	0/1	control	TSPAN2		intron_variant
393	52706939	G	A	0/1	control	TSPAN2		intron_variant
394	52706993	C	T	1/1	case	TSPAN2		intron_variant
394	52706993	C	T	0/1	control	TSPAN2		intron_variant
394	52706993	C	T	0/1	control	TSPAN2		intron_variant
394	52706993	C	T	0/1	control	TSPAN2		intron_variant
395	52709400	T	C	1/1	case	TSPAN2		intron_variant
395	52709400	T	C	0/1	control	TSPAN2		intron_variant
395	52709400	T	C	0/1	control	TSPAN2		intron_variant
395	52709400	T	C	0/1	control	TSPAN2		intron_variant
396	52725585	T	C	1/1	case	TSPAN2		intron_variant
396	52725585	T	C	0/1	control	TSPAN2		intron_variant
396	52725585	T	C	0/1	control	TSPAN2		intron_variant
396	52725585	T	C	0/1	control	TSPAN2		intron_variant
397	52726186	G	A	1/1	case	TSPAN2		intron_variant
397	52726186	G	A	0/1	control	TSPAN2		intron_variant
397	52726186	G	A	0/1	control	TSPAN2		intron_variant
397	52726186	G	A	0/1	control	TSPAN2		intron_variant
398	52728003	T	A	1/1	case	TSPAN2		intron_variant
398	52728003	T	A	0/1	control	TSPAN2		intron_variant
398	52728003	T	A	0/1	control	TSPAN2		intron_variant
398	52728003	T	A	0/1	control	TSPAN2		intron_variant
399	52729408	G	A	1/1	case	TSPAN2		intron_variant
399	52729408	G	A	0/1	control	TSPAN2		intron_variant
399	52729408	G	A	0/1	control	TSPAN2		intron_variant
399	52729408	G	A	0/1	control	TSPAN2		intron_variant
400	52736605	G	A	1/1	case	TSPAN2		intron_variant
400	52736605	G	A	0/1	control	TSPAN2		intron_variant
400	52736605	G	A	0/1	control	TSPAN2		intron_variant
400	52736605	G	A	0/1	control	TSPAN2		intron_variant
401	52746077	C	CA,CA	1/1	case			upstream_gene_variant,intergenic_region
401	52746077	C	CA,CA	0/1	control			upstream_gene_variant,intergenic_region
401	52746077	C	CA,CA	0/1	control			upstream_gene_variant,intergenic_region
401	52746077	C	CA,CA	0/1	control			upstream_gene_variant,intergenic_region
402	52768948	T	TGCCC	1/1	case			intergenic_region
402	52768948	T	TGCCC	0/1	control			intergenic_region
402	52768948	T	TGCCC	0/1	control			intergenic_region
402	52768948	T	TGCCC	0/1	control			intergenic_region
403	52769345	TCC	T	1/1	case			intergenic_region
403	52769345	TCC	T	0/1	control			intergenic_region
403	52769345	TCC	T	0/1	control			intergenic_region
403	52769345	TCC	T	0/1	control			intergenic_region
404	52770947	C	T	1/1	case			intergenic_region
404	52770947	C	T	0/1	control			intergenic_region
404	52770947	C	T	0/1	control			intergenic_region
404	52770947	C	T	0/1	control			intergenic_region
405	52771444	G	A	1/1	case			intergenic_region
405	52771444	G	A	0/1	control			intergenic_region
405	52771444	G	A	0/1	control			intergenic_region
405	52771444	G	A	0/1	control			intergenic_region
406	52771455	C	G	1/1	case			intergenic_region
406	52771455	C	G	0/1	control			intergenic_region
406	52771455	C	G	0/1	control			intergenic_region
406	52771455	C	G	0/1	control			intergenic_region
407	52771571	A	T	1/1	case			intergenic_region
407	52771571	A	T	0/1	control			intergenic_region
407	52771571	A	T	0/1	control			intergenic_region
407	52771571	A	T	0/1	control			intergenic_region
408	52771985	A	G	1/1	case			intergenic_region
408	52771985	A	G	0/1	control			intergenic_region
408	52771985	A	G	0/1	control			intergenic_region
408	52771985	A	G	0/1	control			intergenic_region
409	52771998	C	T	1/1	case			intergenic_region
409	52771998	C	T	0/1	control			intergenic_region
409	52771998	C	T	0/1	control			intergenic_region
409	52771998	C	T	0/1	control			intergenic_region
410	52772041	A	G	1/1	case			intergenic_region
410	52772041	A	G	0/1	control			intergenic_region
410	52772041	A	G	0/1	control			intergenic_region
410	52772041	A	G	0/1	control			intergenic_region
411	52772205	C	CT	1/1	case			intergenic_region
411	52772205	C	CT	0/1	control			intergenic_region
411	52772205	C	CT	0/1	control			intergenic_region
411	52772205	C	CT	0/1	control			intergenic_region
412	52772507	A	C	1/1	case			intergenic_region
412	52772507	A	C	0/1	control			intergenic_region
412	52772507	A	C	0/1	control			intergenic_region
412	52772507	A	C	0/1	control			intergenic_region
413	52772525	T	TC	1/1	case			intergenic_region
413	52772525	T	TC	0/1	control			intergenic_region
413	52772525	T	TC	0/1	control			intergenic_region
413	52772525	T	TC	0/1	control			intergenic_region
414	52772600	T	C	1/1	case			intergenic_region
414	52772600	T	C	0/1	control			intergenic_region
414	52772600	T	C	0/1	control			intergenic_region
414	52772600	T	C	0/1	control			intergenic_region
415	52772601	G	A	1/1	case			intergenic_region
415	52772601	G	A	0/1	control			intergenic_region
415	52772601	G	A	0/1	control			intergenic_region
415	52772601	G	A	0/1	control			intergenic_region
416	52772661	C	T	1/1	case			intergenic_region
416	52772661	C	T	0/1	control			intergenic_region
416	52772661	C	T	0/1	control			intergenic_region
416	52772661	C	T	0/1	control			intergenic_region
417	52772717	A	G	1/1	case			intergenic_region
417	52772717	A	G	0/1	control			intergenic_region
417	52772717	A	G	0/1	control			intergenic_region
417	52772717	A	G	0/1	control			intergenic_region
418	52772763	A	G	1/1	case			intergenic_region
418	52772763	A	G	0/1	control			intergenic_region
418	52772763	A	G	0/1	control			intergenic_region
418	52772763	A	G	0/1	control			intergenic_region
419	52772788	A	G	1/1	case			intergenic_region
419	52772788	A	G	0/1	control			intergenic_region
419	52772788	A	G	0/1	control			intergenic_region
419	52772788	A	G	0/1	control			intergenic_region
420	52772810	GAGGACAGA	G	1/1	case			intergenic_region
420	52772810	GAGGACAGA	G	0/1	control			intergenic_region
420	52772810	GAGGACAGA	G	0/1	control			intergenic_region
420	52772810	GAGGACAGA	G	0/1	control			intergenic_region
421	52772866	C	T	1/1	case			intergenic_region
421	52772866	C	T	0/1	control			intergenic_region
421	52772866	C	T	0/1	control			intergenic_region
421	52772866	C	T	0/1	control			intergenic_region
422	52772885	A	C	1/1	case			intergenic_region
422	52772885	A	C	0/1	control			intergenic_region
422	52772885	A	C	0/1	control			intergenic_region
422	52772885	A	C	0/1	control			intergenic_region
423	52772888	C	T	1/1	case			intergenic_region
423	52772888	C	T	0/1	control			intergenic_region
423	52772888	C	T	0/1	control			intergenic_region
423	52772888	C	T	0/1	control			intergenic_region
424	52772957	A	G	1/1	case			intergenic_region
424	52772957	A	G	0/1	control			intergenic_region
424	52772957	A	G	0/1	control			intergenic_region
424	52772957	A	G	0/1	control			intergenic_region
425	52772979	A	G	1/1	case			intergenic_region
425	52772979	A	G	0/1	control			intergenic_region
425	52772979	A	G	0/1	control			intergenic_region
425	52772979	A	G	0/1	control			intergenic_region
426	52773011	G	A	1/1	case			intergenic_region
426	52773011	G	A	0/1	control			intergenic_region
426	52773011	G	A	0/1	control			intergenic_region
426	52773011	G	A	0/1	control			intergenic_region
427	52776304	T	C	1/1	case			intergenic_region
427	52776304	T	C	0/1	control			intergenic_region
427	52776304	T	C	0/1	control			intergenic_region
427	52776304	T	C	0/1	control			intergenic_region
428	52776554	T	A,TA	1/1	case			intergenic_region,intergenic_region
428	52776554	T	A,TA	0/1	control			intergenic_region,intergenic_region
428	52776554	T	A,TA	0/1	control			intergenic_region,intergenic_region
428	52776554	T	A,TA	0/1	control			intergenic_region,intergenic_region
429	52776931	G	C	1/1	case			intergenic_region
429	52776931	G	C	0/1	control			intergenic_region
429	52776931	G	C	0/1	control			intergenic_region
429	52776931	G	C	0/1	control			intergenic_region
450	52776986	G	A	1/1	case			intergenic_region
450	52776986	G	A	0/1	control			intergenic_region
450	52776986	G	A	0/1	control			intergenic_region
450	52776986	G	A	0/1	control			intergenic_region
451	52777156	T	C	1/1	case			intergenic_region
451	52777156	T	C	0/1	control			intergenic_region
451	52777156	T	C	0/1	control			intergenic_region
451	52777156	T	C	0/1	control			intergenic_region
452	52777238	A	G	1/1	case			intergenic_region
452	52777238	A	G	0/1	control			intergenic_region
452	52777238	A	G	0/1	control			intergenic_region
452	52777238	A	G	0/1	control			intergenic_region
453	52778066	T	C	1/1	case			intergenic_region
453	52778066	T	C	0/1	control			intergenic_region
453	52778066	T	C	0/1	control			intergenic_region
453	52778066	T	C	0/1	control			intergenic_region
454	52778704	C	T	1/1	case			intergenic_region
454	52778704	C	T	0/1	control			intergenic_region
454	52778704	C	T	0/1	control			intergenic_region
454	52778704	C	T	0/1	control			intergenic_region
454	52778704	C	T	0/1	control			intergenic_region
455	52779410	C	T	1/1	case			intergenic_region
455	52779410	C	T	0/1	control			intergenic_region
455	52779410	C	T	0/1	control			intergenic_region
455	52779410	C	T	0/1	control			intergenic_region
456	52780137	T	G	1/1	case			intergenic_region
456	52780137	T	G	0/1	control			intergenic_region
456	52780137	T	G	0/1	control			intergenic_region
456	52780137	T	G	0/1	control			intergenic_region
457	52780139	TTCTCTC	T	1/1	case			intergenic_region
457	52780139	TTCTCTC	T	0/1	control			intergenic_region
457	52780139	TTCTCTC	T	0/1	control			intergenic_region
457	52780139	TTCTCTC	T	0/1	control			intergenic_region
458	52780145	C	CAGAGAG	1/1	case			intergenic_region
458	52780145	C	CAGAGAG	0/1	control			intergenic_region
458	52780145	C	CAGAGAG	0/1	control			intergenic_region
458	52780145	C	CAGAGAG	0/1	control			intergenic_region
459	52781003	G	A	1/1	case			intergenic_region
459	52781003	G	A	0/1	control			intergenic_region
459	52781003	G	A	0/1	control			intergenic_region
459	52781003	G	A	0/1	control			intergenic_region
460	52781269	T	G	1/1	case			intergenic_region
460	52781269	T	G	0/1	control			intergenic_region
460	52781269	T	G	0/1	control			intergenic_region
460	52781269	T	G	0/1	control			intergenic_region
461	52781283	A	G	1/1	case			intergenic_region
461	52781283	A	G	0/1	control			intergenic_region
461	52781283	A	G	0/1	control			intergenic_region
461	52781283	A	G	0/1	control			intergenic_region
462	52783993	T	G	1/1	case			intergenic_region
462	52783993	T	G	0/1	control			intergenic_region
462	52783993	T	G	0/1	control			intergenic_region
462	52783993	T	G	0/1	control			intergenic_region
463	52823437	C	T	1/1	case			intergenic_region
463	52823437	C	T	0/1	control			intergenic_region
463	52823437	C	T	0/1	control			intergenic_region
463	52823437	C	T	0/1	control			intergenic_region
464	52823489	TAAAA	T	1/1	case			intergenic_region
464	52823489	TAAAA	T	0/1	control			intergenic_region
464	52823489	TAAAA	T	0/1	control			intergenic_region
464	52823489	TAAAA	T,TAAA	0/1	control			intergenic_region,intergenic_region
465	52823494	A	T	1/1	case			intergenic_region
465	52823494	A	T	0/1	control			intergenic_region
465	52823494	A	T	0/1	control			intergenic_region
465	52823494	A	T	0/1	control			intergenic_region
466	52823503	A	T	1/1	case			intergenic_region
466	52823503	A	T	0/1	control			intergenic_region
466	52823503	A	T	0/1	control			intergenic_region
466	52823503	A	T	0/1	control			intergenic_region
467	52823781	C	T	1/1	case			intergenic_region
467	52823781	C	T	0/1	control			intergenic_region
467	52823781	C	T	0/1	control			intergenic_region
467	52823781	C	T	0/1	control			intergenic_region
468	52823787	C	T	1/1	case			intergenic_region
468	52823787	C	T	0/1	control			intergenic_region
468	52823787	C	T	0/1	control			intergenic_region
468	52823787	C	T	0/1	control			intergenic_region
469	52823899	G	A	1/1	case			intergenic_region
469	52823899	G	A	0/1	control			intergenic_region
469	52823899	G	A	0/1	control			intergenic_region
469	52823899	G	A	0/1	control			intergenic_region
470	52824254	G	A	1/1	case			intergenic_region
470	52824254	G	A	0/1	control			intergenic_region
470	52824254	G	A	0/1	control			intergenic_region
470	52824254	G	A	0/1	control			intergenic_region
471	52824376	G	A	1/1	case			intergenic_region
471	52824376	G	A	0/1	control			intergenic_region
471	52824376	G	A	0/1	control			intergenic_region
471	52824376	G	A	0/1	control			intergenic_region
472	52825717	GGACTT	G	1/1	case			intergenic_region
472	52825717	GGACTT	G	0/1	control			intergenic_region
472	52825717	GGACTT	G	0/1	control			intergenic_region
472	52825717	GGACTT	G	0/1	control			intergenic_region
473	52825787	G	A	1/1	case			intergenic_region
473	52825787	G	A	0/1	control			intergenic_region
473	52825787	G	A	0/1	control			intergenic_region
473	52825787	G	A	0/1	control			intergenic_region
474	52826591	T	C	1/1	case			intergenic_region
474	52826591	T	C	0/1	control			intergenic_region
474	52826591	T	C	0/1	control			intergenic_region
474	52826591	T	C	0/1	control			intergenic_region
475	52826592	A	G	1/1	case			intergenic_region
475	52826592	A	G	0/1	control			intergenic_region
475	52826592	A	G	0/1	control			intergenic_region
475	52826592	A	G	0/1	control			intergenic_region
476	52826741	G	T	1/1	case			intergenic_region
476	52826741	G	T	0/1	control			intergenic_region
476	52826741	G	T	0/1	control			intergenic_region
476	52826741	G	T	0/1	control			intergenic_region
477	52826945	T	C	1/1	case			intergenic_region
477	52826945	T	C	0/1	control			intergenic_region
477	52826945	T	C	0/1	control			intergenic_region
477	52826945	T	C	0/1	control			intergenic_region
478	52827072	GATATATATATAT	G	1/1	case			intergenic_region
478	52827072	GATATATATATAT	G	0/1	control			intergenic_region
478	52827072	GATATATATATAT	G	0/1	control			intergenic_region
478	52827072	GATATATATATAT	G	0/1	control			intergenic_region
479	52827086	T	G	1/1	case			intergenic_region
479	52827086	T	G	0/1	control			intergenic_region
479	52827086	T	G	0/1	control			intergenic_region
479	52827086	T	G	0/1	control			intergenic_region
480	52827088	ATAT	A	1/1	case			intergenic_region
480	52827088	ATAT	A	0/1	control			intergenic_region
480	52827088	ATAT	A	0/1	control			intergenic_region
480	52827088	ATAT	A	0/1	control			intergenic_region
481	52827092	GCT	G	1/1	case			intergenic_region
481	52827092	GCT	G	0/1	control			intergenic_region
481	52827092	GCT	G	0/1	control			intergenic_region
481	52827092	GCT	G	0/1	control			intergenic_region
482	52827142	T	C	1/1	case			intergenic_region
482	52827142	T	C	0/1	control			intergenic_region
482	52827142	T	C	0/1	control			intergenic_region
482	52827142	T	C	0/1	control			intergenic_region
483	52827703	A	C	1/1	case			intergenic_region
483	52827703	A	C	0/1	control			intergenic_region
483	52827703	A	C	0/1	control			intergenic_region
483	52827703	A	C	0/1	control			intergenic_region
484	52827743	G	A	1/1	case			intergenic_region
484	52827743	G	A	0/1	control			intergenic_region
484	52827743	G	A	0/1	control			intergenic_region
484	52827743	G	A	0/1	control			intergenic_region
485	52827759	A	G	1/1	case			intergenic_region
485	52827759	A	G	0/1	control			intergenic_region
485	52827759	A	G	0/1	control			intergenic_region
485	52827759	A	G	0/1	control			intergenic_region
486	52829974	A	AAGAAAGAAAGAAAGAAAGAAAGAAAGAAAGAAAG	1/1	case			intergenic_region
486	52829974	A	AAGAAAGAAAGAAAGAAAGAAAGAAAG,AAGAAAGAAAGAAAGAAAGAAAGAAAGAAAGAAAG	1/2	control			intergenic_region,intergenic_region
486	52829974	A	AAGAAAGAAAGAAAGAAAGAAAGAAAG,AAGAAAGAAAGAAAGAAAGAAAGAAAGAAAGAAAG	1/2	control			intergenic_region,intergenic_region
486	52829974	A	AAGAAAGAAAGAAAGAAAGAAAGAAAGAAAG,AAGAAAGAAAGAAAGAAAGAAAGAAAGAAAGAAAG	1/2	control			intergenic_region,intergenic_region
487	52834972	T	TG	1/1	case			intergenic_region
487	52834972	T	TG	0/1	control			intergenic_region
487	52834972	T	TG	0/1	control			intergenic_region
487	52834972	T	TG	0/1	control			intergenic_region
488	52834974	G	GCAGGTGGCGCCTCA	1/1	case			intergenic_region
488	52834974	G	GCAGGTGGCGCCTCA	0/1	control			intergenic_region
488	52834974	G	GCAGGTGGCGCCTCA	0/1	control			intergenic_region
488	52834974	G	GCAGGTGGCGCCTCA	0/1	control			intergenic_region
489	52837243	C	T	1/1	case			intergenic_region
489	52837243	C	T	0/1	control			intergenic_region
489	52837243	C	T	0/1	control			intergenic_region
489	52837243	C	T	0/1	control			intergenic_region
490	52860228	C	T	1/1	case			intergenic_region
490	52860228	C	T	0/1	control			intergenic_region
490	52860228	C	T	0/1	control			intergenic_region
490	52860228	C	T	0/1	control			intergenic_region
491	52868497	T	A	1/1	case			intergenic_region
491	52868497	T	A	0/1	control			intergenic_region
491	52868497	T	A	0/1	control			intergenic_region
491	52868497	T	A	0/1	control			intergenic_region
492	52876427	TG	T	1/1	case			intergenic_region
492	52876427	TGGG	T	0/1	control			intergenic_region
492	52876427	TGGG	T,TGG	1/2	control			intergenic_region,intergenic_region
492	52876427	TGGG	T,TG	1/2	control			intergenic_region,intergenic_region
493	52882754	T	G	1/1	case			intergenic_region
493	52882754	T	G	0/1	control			intergenic_region
493	52882754	T	G	0/1	control			intergenic_region
493	52882754	T	G	0/1	control			intergenic_region
494	52890055	C	T	1/1	case			intergenic_region
494	52890055	C	T	0/1	control			intergenic_region
494	52890055	C	T	0/1	control			intergenic_region
494	52890055	C	T	0/1	control			intergenic_region
495	52896117	T	C,C	1/1	case			downstream_gene_variant,intergenic_region
495	52896117	T	C,C	0/1	control			downstream_gene_variant,intergenic_region
495	52896117	T	C,C	0/1	control			downstream_gene_variant,intergenic_region
495	52896117	T	C,C	0/1	control			downstream_gene_variant,intergenic_region
496	52896442	T	C,C	1/1	case			downstream_gene_variant,intergenic_region
496	52896442	T	C,C	0/1	control			downstream_gene_variant,intergenic_region
496	52896442	T	C,C	0/1	control			downstream_gene_variant,intergenic_region
496	52896442	T	C,C	0/1	control			downstream_gene_variant,intergenic_region
497	52896519	C	CT,CT	1/1	case			downstream_gene_variant,intergenic_region
497	52896519	C	CT,CT	0/1	control			downstream_gene_variant,intergenic_region
497	52896519	C	CT,CT	0/1	control			downstream_gene_variant,intergenic_region
497	52896519	C	CT,CT	0/1	control			downstream_gene_variant,intergenic_region
498	52896625	G	A,A	1/1	case			downstream_gene_variant,intergenic_region
498	52896625	G	A,A	0/1	control			downstream_gene_variant,intergenic_region
498	52896625	G	A,A	0/1	control			downstream_gene_variant,intergenic_region
498	52896625	G	A,A	0/1	control			downstream_gene_variant,intergenic_region
499	52900275	G	A,A	1/1	case			downstream_gene_variant,intergenic_region
499	52900275	G	A,A	0/1	control			downstream_gene_variant,intergenic_region
499	52900275	G	A,A	0/1	control			downstream_gene_variant,intergenic_region
499	52900275	G	A,A	0/1	control			downstream_gene_variant,intergenic_region
500	52914707	C	CG	1/1	case			intergenic_region
500	52914707	C	CG	0/1	control			intergenic_region
500	52914707	C	CG	0/1	control			intergenic_region
500	52914707	C	CG	0/1	control			intergenic_region
501	52915174	A	G	1/1	case			intergenic_region
501	52915174	A	G	0/1	control			intergenic_region
501	52915174	A	G	0/1	control			intergenic_region
501	52915174	A	G	0/1	control			intergenic_region
502	52915510	T	A	1/1	case			intergenic_region
502	52915510	T	A	0/1	control			intergenic_region
502	52915510	T	A	0/1	control			intergenic_region
502	52915510	T	A	0/1	control			intergenic_region
503	52917326	C	T	1/1	case			intergenic_region
503	52917326	C	T	0/1	control			intergenic_region
503	52917326	C	T	0/1	control			intergenic_region
503	52917326	C	T	0/1	control			intergenic_region
504	52917361	A	G	1/1	case			intergenic_region
504	52917361	A	G	0/1	control			intergenic_region
504	52917361	A	G	0/1	control			intergenic_region
504	52917361	A	G	0/1	control			intergenic_region
505	52917368	T	C	1/1	case			intergenic_region
505	52917368	T	C	0/1	control			intergenic_region
505	52917368	T	C	0/1	control			intergenic_region
505	52917368	T	C	0/1	control			intergenic_region
506	52917946	GA	G	1/1	case			intergenic_region
506	52917946	GA	G	0/1	control			intergenic_region
506	52917946	GA	G	0/1	control			intergenic_region
506	52917946	GA	G	0/1	control			intergenic_region
507	52918994	ACAC	A	1/1	case			intergenic_region
507	52918994	ACAC	A	0/1	control			intergenic_region
507	52918994	ACAC	A	0/1	control			intergenic_region
507	52918994	ACAC	A	0/1	control			intergenic_region
508	52925032	C	T	1/1	case			intergenic_region
508	52925032	C	T	0/1	control			intergenic_region
508	52925032	C	T	0/1	control			intergenic_region
508	52925032	C	T	0/1	control			intergenic_region
509	52925075	A	G	1/1	case			intergenic_region
509	52925075	A	G	0/1	control			intergenic_region
509	52925075	A	G	0/1	control			intergenic_region
509	52925075	A	G	0/1	control			intergenic_region
510	52925889	G	A	1/1	case			intergenic_region
510	52925889	G	A	0/1	control			intergenic_region
510	52925889	G	A	0/1	control			intergenic_region
510	52925889	G	A	0/1	control			intergenic_region
511	52926215	GA	G	1/1	case			intergenic_region
511	52926215	GA	G	0/1	control			intergenic_region
511	52926215	GA	G	0/1	control			intergenic_region
511	52926215	GA	G	0/1	control			intergenic_region
512	52932979	G	A	1/1	case			intergenic_region
512	52932979	G	A	0/1	control			intergenic_region
512	52932979	G	A	0/1	control			intergenic_region
512	52932979	G	A	0/1	control			intergenic_region
513	52936188	C	A	1/1	case			intergenic_region
513	52936188	C	A	0/1	control			intergenic_region
513	52936188	C	A	0/1	control			intergenic_region
513	52936188	C	A	0/1	control			intergenic_region
514	52972163	G	T	1/1	case			intergenic_region
514	52972163	G	T	0/1	control			intergenic_region
514	52972163	G	T	0/1	control			intergenic_region
514	52972163	G	T	0/1	control			intergenic_region
515	52972550	GAGAC	G	1/1	case			intergenic_region
515	52972550	GAGAC	G	0/1	control			intergenic_region
515	52972550	GAGAC	G	0/1	control			intergenic_region
515	52972550	GAGAC	G	0/1	control			intergenic_region
516	52973295	A	C	1/1	case			intergenic_region
516	52973295	A	C	0/1	control			intergenic_region
[truncated: 222 more rows]

## Sheet: Structural variants
Table S2. Variants in the GWAS hit region.
Sheet 2: Structural variants
Green shading shows the homozygous region. Blue shading shows the extended region where 16/17 cases are homozygous.
chromosome	start	end	length	sv_type		genes	verify_start	verify_end
17	51318750	51515065	196315	INV	All	ZNF638,ENSCAFG00000038020,ENSCAFG00000029533,ENSCAFG00000035682,PAIP2B,NAGK,ENSCAFG00000034193	TRUE	TRUE
17	52032471	52033049	578	DEL	3 control, 1 goniodysgenesis, 1 glaucoma	ENSCAFG00000034516-ENSCAFG00000021040	TRUE	TRUE
17	52519694	52522792	3098	DUP	All	ENSCAFG00000009671,SIKE1-ENSCAFG00000009671	TRUE	TRUE
17	52682003	52682871	868	DEL	3 control, 2 goniodysgenesis, 3 glaucoma	TSHB	TRUE	TRUE
17	52689153	52690665	1512	DEL	All	TSPAN2,TSHB,TSHB-TSPAN2	TRUE	TRUE
17	52825406	52827836	2430	DEL	All	ENSCAFG00000035446	TRUE	TRUE
17	52825424	52827911	2487	DUP	All	ENSCAFG00000035446	TRUE	TRUE
