# Supplementary material
Source: publisher figshare collection journal article supplement (https://gsajournals.figshare.com/articles/dataset/_/7414073)
Supplement: Supplementary file 2 [file 1]

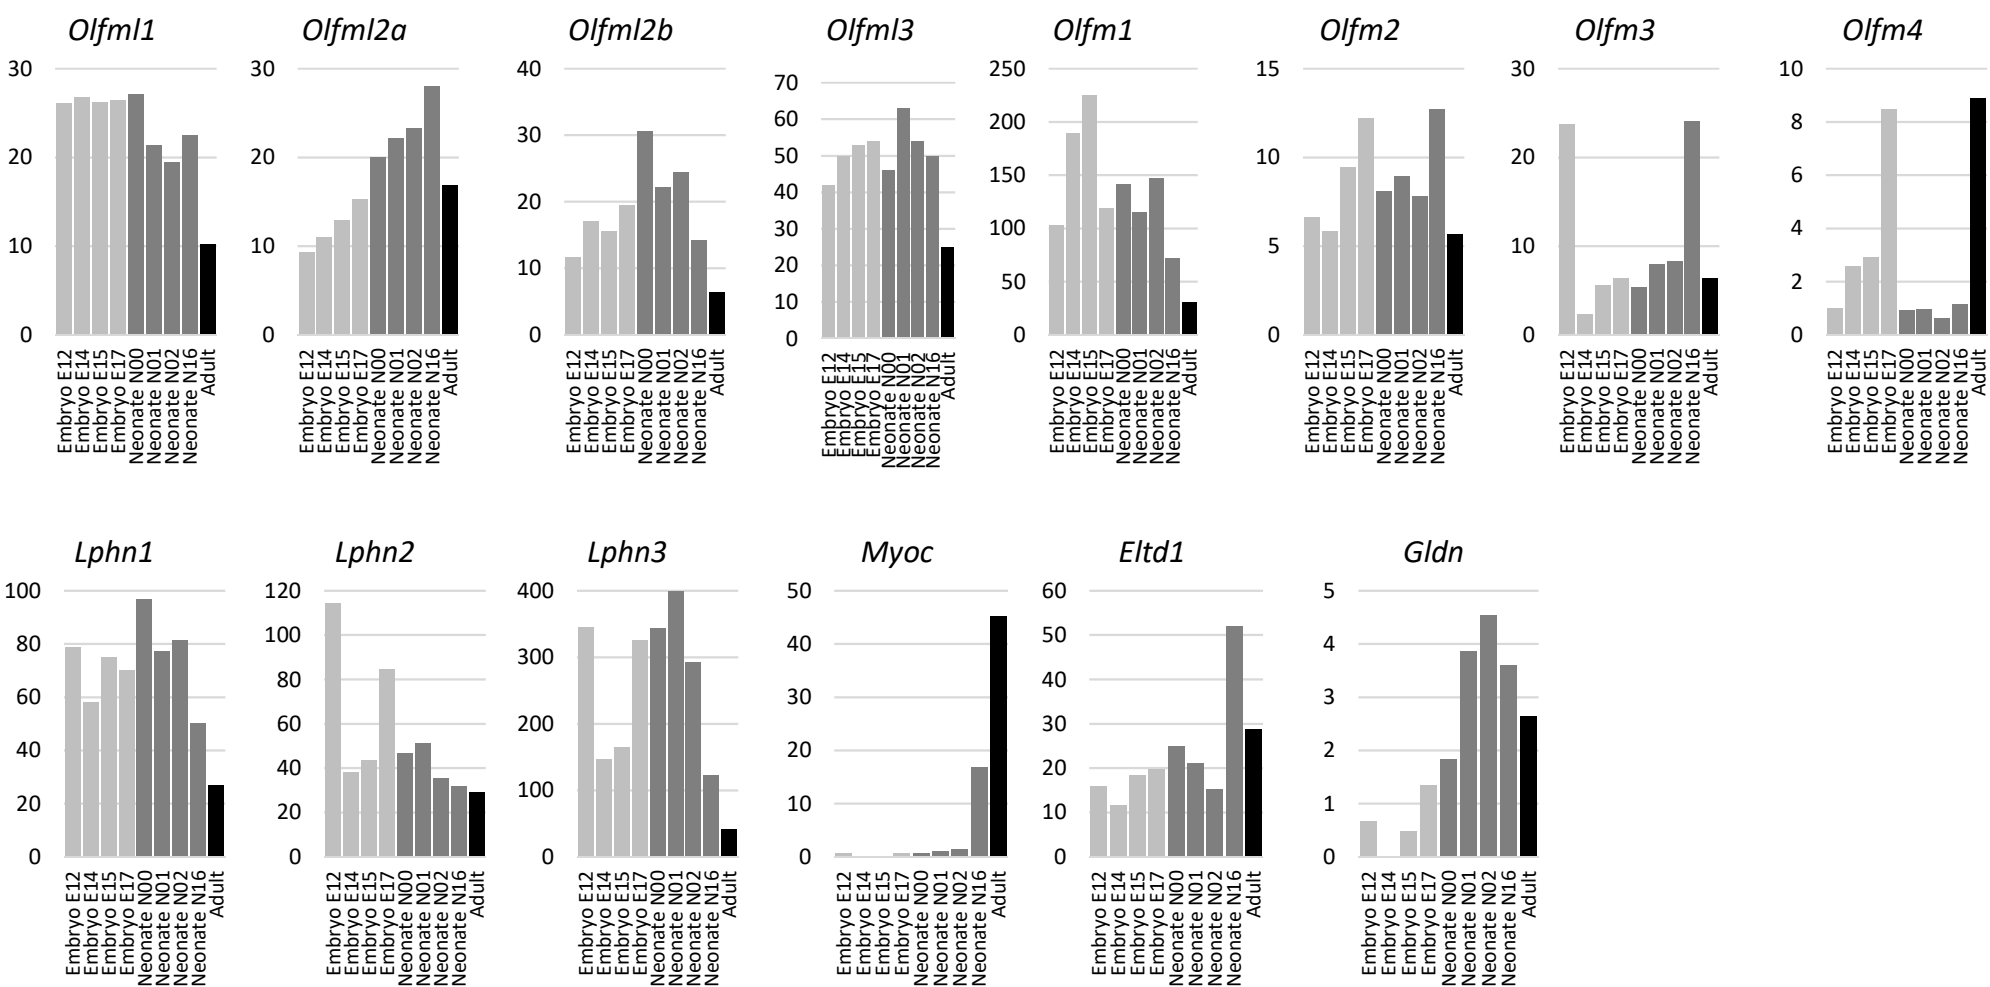

**Figure S4.** Expression of olfactomedin family genes in the developing mouse eye. Expression levels derived from data from the FANTOM5 project (<http://fantom.gsc.riken.jp/zenbu>); accession numbers of the samples are given in **Supplemental Table S1**. Y axis shows RLE normalised expression levels based on CAGE analysis. X axis shows the age. Light grey – embryonic; dark grey – neonatal; black – adult.
