# Supplementary material
Source: publisher figshare collection journal article supplement (https://gsajournals.figshare.com/articles/dataset/_/7414073)
Supplement: Supplementary file 3 [file 1]

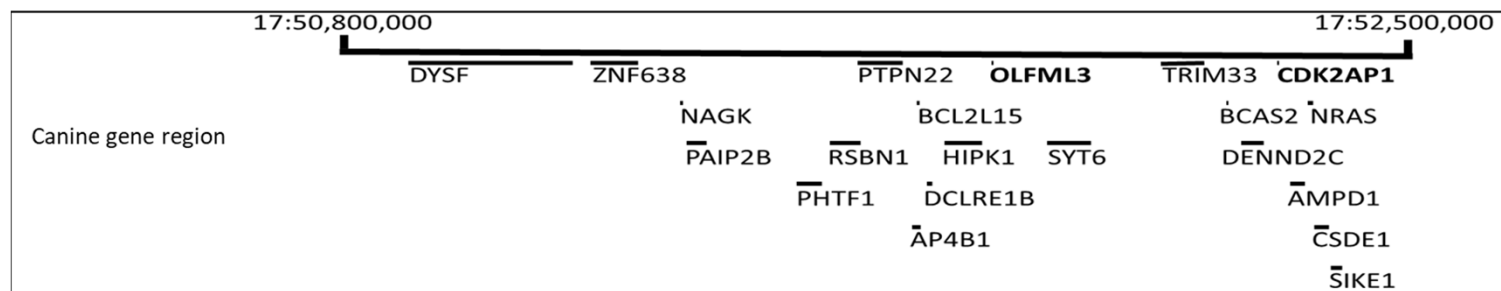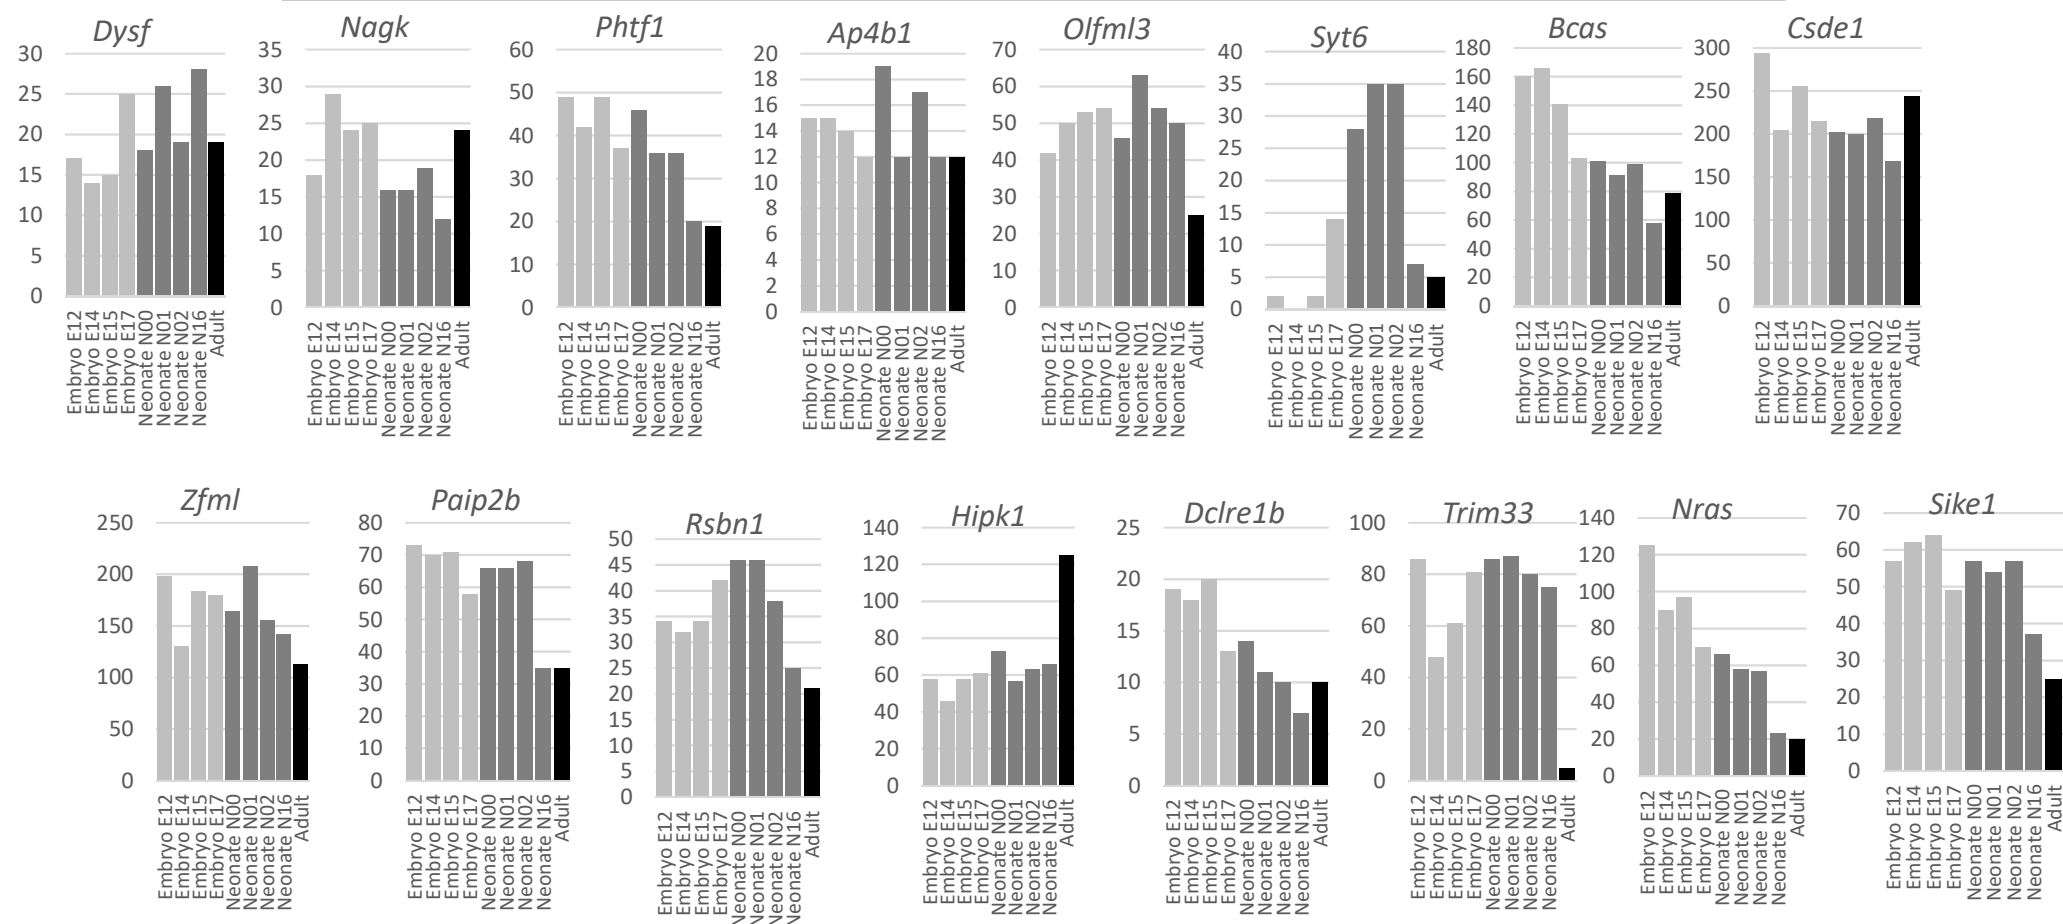

Negligible expression: *Bcl2l15*, *Ptpn22*, *Dennd2c*, *Ampd1*. Mouse *Cdk2ap1* is not in the syntenic region in mouse.

**Figure S1.** Expression of genes from the candidate region in the developing mouse eye.

Expression of genes in the candidate region in the developing mouse eye. Upper box shows the canine genes in the region. Lower panels show expression of the genes in the developing mouse eyeball. Y axis shows RLE normalised expression levels. Data taken from FANTOM5 (see **Supplemental Table S1**). Light grey – embryonic; dark grey – neonatal; black – adult.
