# Supplementary material
Source: publisher figshare collection journal article supplement (https://gsajournals.figshare.com/articles/dataset/_/7414073)
Supplement: Supplementary file 4 [file 1]

A

Mouse *Olfm13*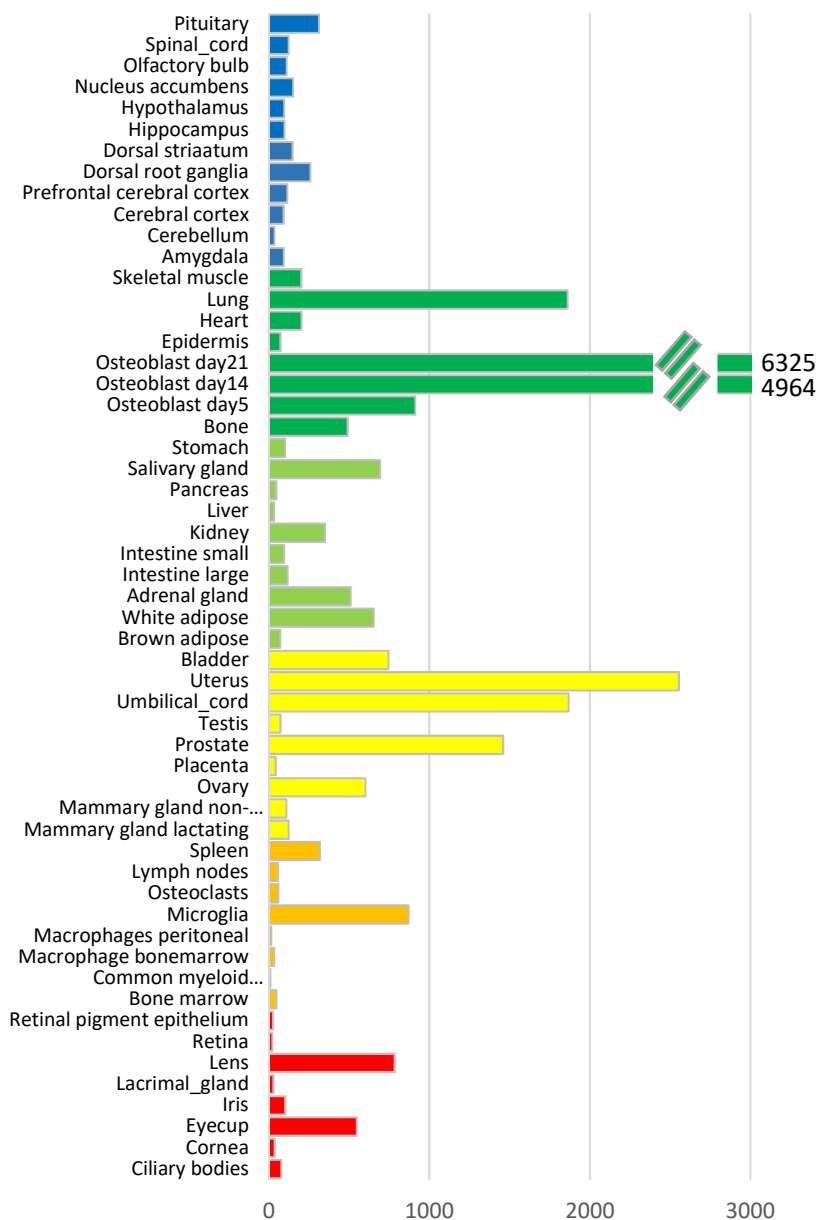

B

Mouse *Olfm13* in immune cells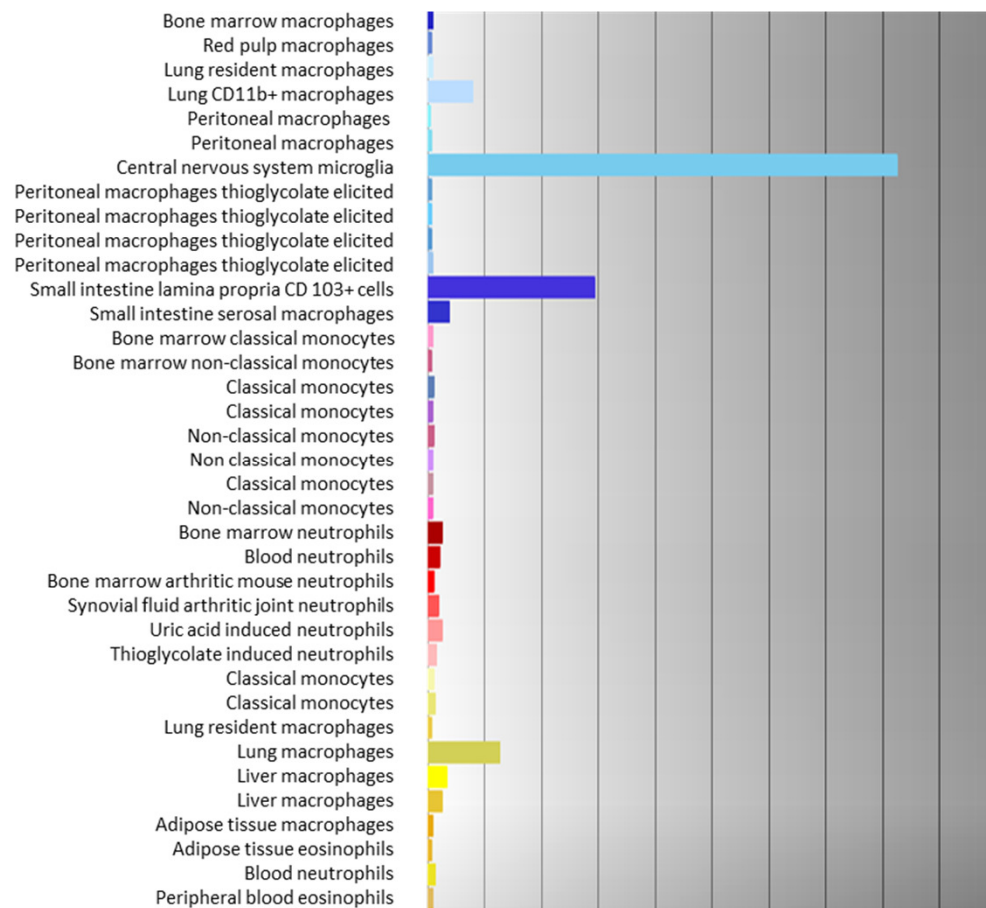

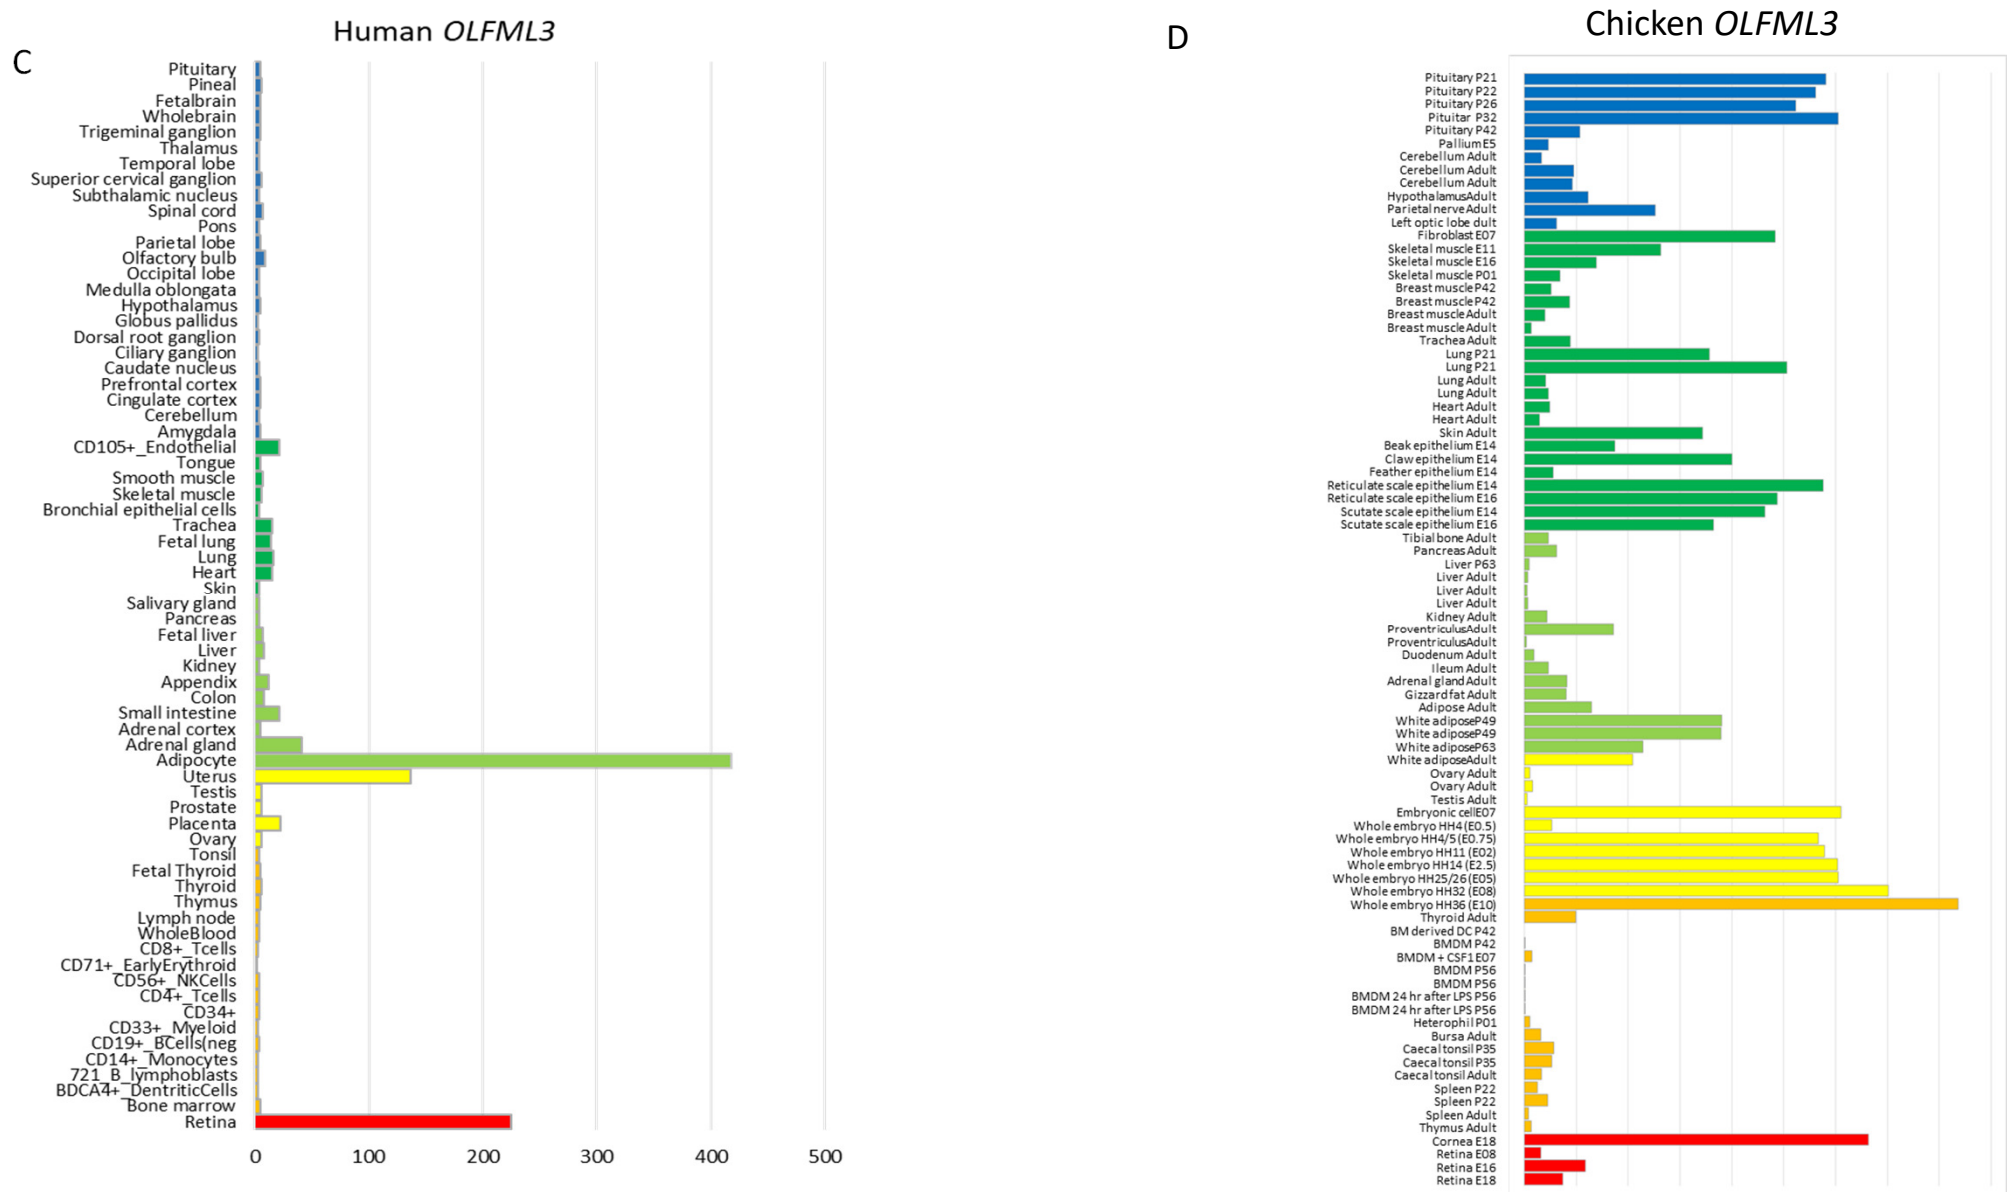

**Figure S3.** Expression of olfactomedin-like 3 gene in cells and tissues.

- Expression in mouse tissues and cell lines (<http://biogps.org>; microarray probeset 1448475\_at).
  - Expression in mouse myeloid cells (<http://www.immgen.org>, dataset “MFs, Monocytes, Neutrophils”; microarray probeset 10500808).
  - Expression in human tissues and cell lines (<http://biogps.org>; microarray probeset 218162\_at).
  - Expression in chicken tissues (RNA sequencing data curated from public databases and analysed using Kallisto, available at [http://biogps.org/dataset/BDS\\_00031/chicken-atlas/](http://biogps.org/dataset/BDS_00031/chicken-atlas/) (Bush et al. 2018)).
- In A, C and D, blue – nervous tissues; dark green – connective tissues; light green – digestive tract and renal; yellow – reproductive; orange – immune; red – ocular.
