# Supplementary material
Source: publisher figshare collection journal article supplement (https://gsajournals.figshare.com/articles/dataset/_/7414073)
Supplement: Supplementary file 5 [file 1]

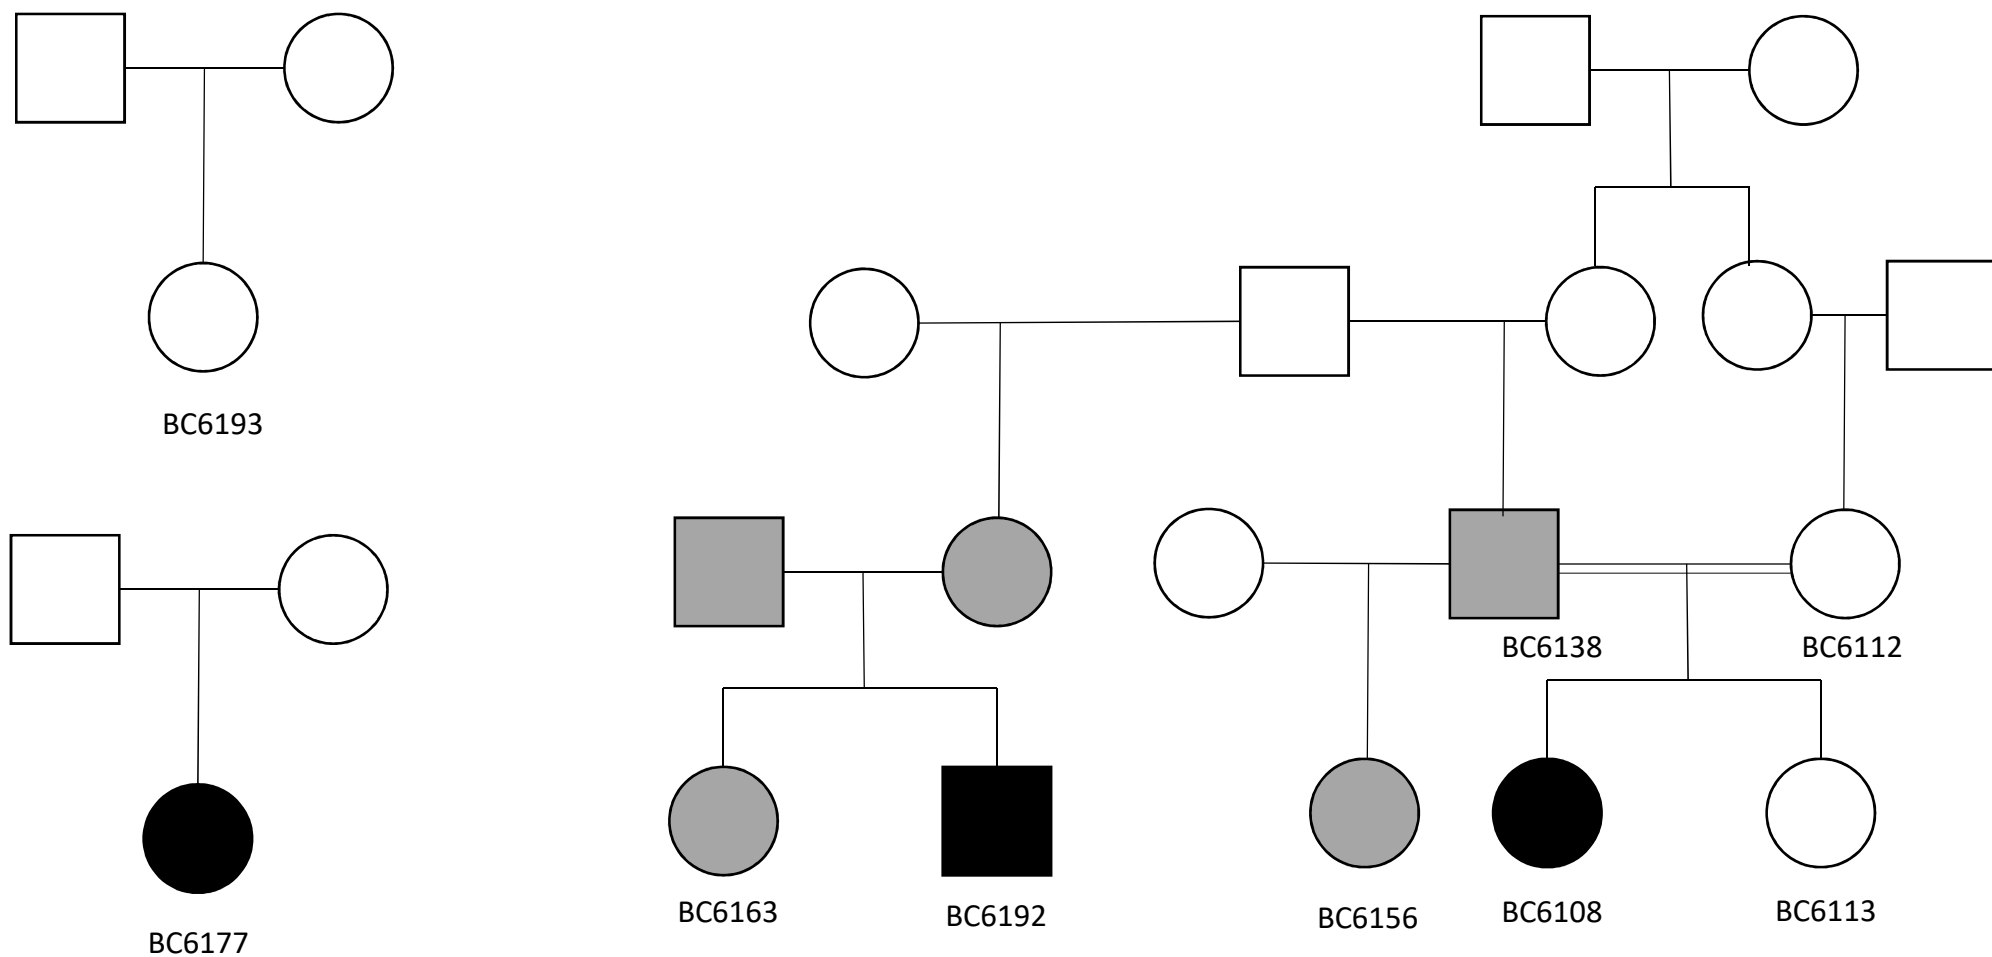

**Figure S2.** Pedigrees of dogs used for whole genome sequencing.

Grey fill indicates severe goniodysgenesis; black fill indicates glaucoma; white fill indicates unaffected or unknown status  
 Double line indicates a first cousin mating; all glaucoma individuals can be traced back to the same three distant common ancestors on both sides.  
 Animals with a BC ID were sequenced.
