# Supplementary material
Source: publisher figshare collection journal article supplement (https://gsajournals.figshare.com/articles/dataset/_/7414073)
Supplement: Supplementary file 6 [file 1]

**Table S4.** Genotypes for rs850595562 within the *CDK2AP1* gene.

| <b>Genotype</b>                   | <b>TT</b> | <b>CT</b> | <b>CC</b> | <b>Total</b> |
|-----------------------------------|-----------|-----------|-----------|--------------|
| <b>Clinical Status</b>            |           |           |           |              |
| <b>Glaucoma</b>                   | 8         | 0         | 0         | 8            |
| <b>Severe<br/>Goniodysgenesis</b> | 10        | 2         | 1         | 12           |
| <b>Unaffected</b>                 | 2         | 33        | 17        | 52           |
| <b>Total</b>                      | 20        | 35        | 17        | 72           |
